# Supplementary material for: Genomic evidence of genetic diversity and functional evolution in Flavobacterium columnare
Source: Front Microbiol. 2023 Sep 28;14:1240471. doi: 10.3389/fmicb.2023.1240471 (PMC10568018; doi:10.3389/fmicb.2023.1240471)
Supplement: Supplementary file 2 [file Data_Sheet_2.XLSX]

## Sheet: AH-01
Gene_id	Identity	E_value	Subject_id	Protein_id	Swissprot_Gene	Organism	url
AH-01_GM000003	56	6.4e-114	Q11WK6	Riboflavin biosynthesis protein RibBA	ribBA	Cytophaga hutchinsonii (strain ATCC 33406 / NCIMB 9469)	https://www.uniprot.org/uniprot/Q11WK6
AH-01_GM000004	78.6	1.4e-231	P10484	Type I restriction enzyme EcoR124II M protein	hsdM	Escherichia coli	https://www.uniprot.org/uniprot/P10484
AH-01_GM000006	66.9	1.2e-67	P71344	Putative type I restriction enzyme specificity protein HI_0216	HI_0216	Haemophilus influenzae (strain ATCC 51907 / DSM 11121 / KW20 / Rd)	https://www.uniprot.org/uniprot/P71344
AH-01_GM000007	48	4.6e-21	P44014	Uncharacterized protein HI_0554	HI_0554	Haemophilus influenzae (strain ATCC 51907 / DSM 11121 / KW20 / Rd)	https://www.uniprot.org/uniprot/P44014
AH-01_GM000008	75	0	P10486	Type I restriction enzyme EcoR124II R protein	hsdR	Escherichia coli	https://www.uniprot.org/uniprot/P10486
AH-01_GM000009	47.7	1.3e-251	Q5HQW9	UvrABC system protein A	uvrA	Staphylococcus epidermidis (strain ATCC 35984 / RP62A)	https://www.uniprot.org/uniprot/Q5HQW9
AH-01_GM000015	41.2	1.7e-13	P14949	Thioredoxin	trxA	Bacillus subtilis (strain 168)	https://www.uniprot.org/uniprot/P14949
AH-01_GM000020	41.8	2.8e-63	P49748	Very long-chain specific acyl-CoA dehydrogenase, mitochondrial	ACADVL	Homo sapiens	https://www.uniprot.org/uniprot/P49748
AH-01_GM000022	53.6	1.2e-107	O32177	3-ketoacyl-CoA thiolase	fadA	Bacillus subtilis (strain 168)	https://www.uniprot.org/uniprot/O32177
AH-01_GM000023	48.9	1.8e-211	O32178	Probable 3-hydroxyacyl-CoA dehydrogenase	fadN	Bacillus subtilis (strain 168)	https://www.uniprot.org/uniprot/O32178
AH-01_GM000028	81.3	7.3e-193	A6H0G9	tRNA-specific 2-thiouridylase MnmA	mnmA	Flavobacterium psychrophilum (strain JIP02/86 / ATCC 49511)	https://www.uniprot.org/uniprot/A6H0G9
AH-01_GM000032	60.2	2.4e-71	Q8A3H9	NAD-dependent protein deacylase	cobB	Bacteroides thetaiotaomicron (strain ATCC 29148 / DSM 2079 / NCTC 10582 / E50 / VPI-5482)	https://www.uniprot.org/uniprot/Q8A3H9
AH-01_GM000036	40.7	4.9e-15	Q9V159	HTH-type transcriptional regulator LrpA	lrpA	Pyrococcus abyssi (strain GE5 / Orsay)	https://www.uniprot.org/uniprot/Q9V159
AH-01_GM000039	47.1	3.5e-51	Q3B276	Lipoprotein-releasing system ATP-binding protein LolD 2	lolD2	Chlorobium luteolum (strain DSM 273 / 2530)	https://www.uniprot.org/uniprot/Q3B276
AH-01_GM000040	51.6	2.3e-20	P96673	Uncharacterized HTH-type transcriptional regulator YdeP	ydeP	Bacillus subtilis (strain 168)	https://www.uniprot.org/uniprot/P96673
AH-01_GM000043	42	8e-90	Q5L3G9	DEAD-box ATP-dependent RNA helicase CshA	cshA	Geobacillus kaustophilus (strain HTA426)	https://www.uniprot.org/uniprot/Q5L3G9
AH-01_GM000045	60.2	1.3e-63	Q8A1D5	Orotate phosphoribosyltransferase	pyrE	Bacteroides thetaiotaomicron (strain ATCC 29148 / DSM 2079 / NCTC 10582 / E50 / VPI-5482)	https://www.uniprot.org/uniprot/Q8A1D5
AH-01_GM000048	67.4	1.3e-224	P22106	Asparagine synthetase B [glutamine-hydrolyzing]	asnB	Escherichia coli (strain K12)	https://www.uniprot.org/uniprot/P22106
AH-01_GM000049	56.3	3.7e-202	P05652	DNA gyrase subunit B	gyrB	Bacillus subtilis (strain 168)	https://www.uniprot.org/uniprot/P05652
AH-01_GM000050	82.6	5.2e-146	Q25QU7	Malate dehydrogenase	mdh	Flavobacterium frigidimaris	https://www.uniprot.org/uniprot/Q25QU7
AH-01_GM000052	56.2	1e-27	P37584	Probable chaperone CsaA	csaA	Bacillus subtilis (strain 168)	https://www.uniprot.org/uniprot/P37584
AH-01_GM000066	42.5	1.6e-21	O34360	Peptidoglycan L-alanyl-D-glutamate endopeptidase CwlK	cwlK	Bacillus subtilis (strain 168)	https://www.uniprot.org/uniprot/O34360
AH-01_GM000115	54	2.2e-158	D9IA43	Cbb3-type cytochrome c oxidase subunit CcoN1	ccoN1	Pseudomonas stutzeri	https://www.uniprot.org/uniprot/D9IA43
AH-01_GM000125	46.6	1.8e-26	Q6T1W8	TDP-4-oxo-6-deoxy-alpha-D-glucose-3,4-oxoisomerase	fdtA	Aneurinibacillus thermoaerophilus	https://www.uniprot.org/uniprot/Q6T1W8
AH-01_GM000128	86	3.5e-74	A5FE53	Ribosomal RNA large subunit methyltransferase H	rlmH	Flavobacterium johnsoniae (strain ATCC 17061 / DSM 2064 / UW101)	https://www.uniprot.org/uniprot/A5FE53
AH-01_GM000129	76.2	5.7e-149	A6H0L5	Dihydroorotate dehydrogenase (quinone)	pyrD	Flavobacterium psychrophilum (strain JIP02/86 / ATCC 49511)	https://www.uniprot.org/uniprot/A6H0L5
AH-01_GM000137	54.2	1.1e-292	Q890X9	UvrABC system protein A	uvrA	Clostridium tetani (strain Massachusetts / E88)	https://www.uniprot.org/uniprot/Q890X9
AH-01_GM000138	75.3	3.1e-68	A5FFL9	Adenine phosphoribosyltransferase	apt	Flavobacterium johnsoniae (strain ATCC 17061 / DSM 2064 / UW101)	https://www.uniprot.org/uniprot/A5FFL9
AH-01_GM000141	90.7	9.2e-204	A5FHX8	Succinate--CoA ligase [ADP-forming] subunit beta	sucC	Flavobacterium johnsoniae (strain ATCC 17061 / DSM 2064 / UW101)	https://www.uniprot.org/uniprot/A5FHX8
AH-01_GM000145	46.5	8.6e-116	P71349	L-serine dehydratase	sdaA	Haemophilus influenzae (strain ATCC 51907 / DSM 11121 / KW20 / Rd)	https://www.uniprot.org/uniprot/P71349
AH-01_GM000151	75.9	3.2e-42	A0M2C1	Nucleoid-associated protein GFO_1796	GFO_1796	Gramella forsetii (strain KT0803)	https://www.uniprot.org/uniprot/A0M2C1
AH-01_GM000152	46.9	3.2e-180	P24555	Protease 2	ptrB	Escherichia coli (strain K12)	https://www.uniprot.org/uniprot/P24555
AH-01_GM000153	41.3	2.9e-68	Q9N0V7	Cystathionine beta-synthase	CBS	Oryctolagus cuniculus	https://www.uniprot.org/uniprot/Q9N0V7
AH-01_GM000155	42.5	4.9e-31	P45173	Uncharacterized protein HI_1349	HI_1349	Haemophilus influenzae (strain ATCC 51907 / DSM 11121 / KW20 / Rd)	https://www.uniprot.org/uniprot/P45173
AH-01_GM000159	54.3	2.4e-36	O26807	Peptide methionine sulfoxide reductase MsrB	msrB	Methanothermobacter thermautotrophicus (strain ATCC 29096 / DSM 1053 / JCM 10044 / NBRC 100330 / Delta H)	https://www.uniprot.org/uniprot/O26807
AH-01_GM000160	52.6	3.7e-50	Q97Y45	Peptide methionine sulfoxide reductase MsrA	msrA	Sulfolobus solfataricus (strain ATCC 35092 / DSM 1617 / JCM 11322 / P2)	https://www.uniprot.org/uniprot/Q97Y45
AH-01_GM000171	47.8	2.3e-64	P0AAT4	Miniconductance mechanosensitive channel YbdG	ybdG	Escherichia coli (strain K12)	https://www.uniprot.org/uniprot/P0AAT4
AH-01_GM000172	41.6	2.6e-19	Q7MLR9	UPF0225 protein VV1358	VV1358	Vibrio vulnificus (strain YJ016)	https://www.uniprot.org/uniprot/Q7MLR9
AH-01_GM000178	48	2.6e-22	Q6NPF9	Thioredoxin Y1, chloroplastic	At1g76760	Arabidopsis thaliana	https://www.uniprot.org/uniprot/Q6NPF9
AH-01_GM000180	59.3	1.8e-164	Q9KGN8	Inosine-5'-monophosphate dehydrogenase	guaB	Bacillus halodurans (strain ATCC BAA-125 / DSM 18197 / FERM 7344 / JCM 9153 / C-125)	https://www.uniprot.org/uniprot/Q9KGN8
AH-01_GM000182	44	8e-63	O07051	L-allo-threonine aldolase	ltaA	Aeromonas jandaei	https://www.uniprot.org/uniprot/O07051
AH-01_GM000183	47.1	1.6e-87	O67695	Peptide chain release factor 2	prfB	Aquifex aeolicus (strain VF5)	https://www.uniprot.org/uniprot/O67695
AH-01_GM000184	42.2	6.8e-41	P45103	Uncharacterized protein HI_1198	HI_1198	Haemophilus influenzae (strain ATCC 51907 / DSM 11121 / KW20 / Rd)	https://www.uniprot.org/uniprot/P45103
AH-01_GM000187	50.5	2e-128	P90597	Dihydrolipoyl dehydrogenase	LPD	Trypanosoma cruzi	https://www.uniprot.org/uniprot/P90597
AH-01_GM000190	42.1	4.6e-161	B2RJX3	Prolyl tripeptidyl peptidase	ptpA	Porphyromonas gingivalis (strain ATCC 33277 / DSM 20709 / CIP 103683 / JCM 12257 / NCTC 11834 / 2561)	https://www.uniprot.org/uniprot/B2RJX3
AH-01_GM000191	53.2	3e-55	O66105	Probable peptidyl-prolyl cis-trans isomerase	ppiB	Treponema pallidum (strain Nichols)	https://www.uniprot.org/uniprot/O66105
AH-01_GM000197	45.1	5.3e-47	O34814	Cell division ATP-binding protein FtsE	ftsE	Bacillus subtilis (strain 168)	https://www.uniprot.org/uniprot/O34814
AH-01_GM000202	40.9	2.4e-70	Q6U1I3	dTDP-4-amino-4,6-dideoxy-D-glucose transaminase	vioA	Shigella dysenteriae	https://www.uniprot.org/uniprot/Q6U1I3
AH-01_GM000211	67.9	2.4e-96	A6GXJ8	UPF0246 protein FP0718	FP0718	Flavobacterium psychrophilum (strain JIP02/86 / ATCC 49511)	https://www.uniprot.org/uniprot/A6GXJ8
AH-01_GM000212	52.8	1.9e-90	O67716	Aspartate-semialdehyde dehydrogenase	asd	Aquifex aeolicus (strain VF5)	https://www.uniprot.org/uniprot/O67716
AH-01_GM000217	42.2	2.8e-53	Q9ZU32	Nicotinate-nucleotide pyrophosphorylase [carboxylating], chloroplastic	QPT	Arabidopsis thaliana	https://www.uniprot.org/uniprot/Q9ZU32
AH-01_GM000222	81.4	1.2e-47	A6H0P3	30S ribosomal protein S6	rpsF	Flavobacterium psychrophilum (strain JIP02/86 / ATCC 49511)	https://www.uniprot.org/uniprot/A6H0P3
AH-01_GM000223	96.9	1.6e-48	A5FE76	30S ribosomal protein S18	rpsR	Flavobacterium johnsoniae (strain ATCC 17061 / DSM 2064 / UW101)	https://www.uniprot.org/uniprot/A5FE76
AH-01_GM000224	80.8	1e-62	A5FE75	50S ribosomal protein L9	rplI	Flavobacterium johnsoniae (strain ATCC 17061 / DSM 2064 / UW101)	https://www.uniprot.org/uniprot/A5FE75
AH-01_GM000226	76.7	3e-300	A6H0N9	DNA ligase	ligA	Flavobacterium psychrophilum (strain JIP02/86 / ATCC 49511)	https://www.uniprot.org/uniprot/A6H0N9
AH-01_GM000229	52.7	3.5e-59	P74038	Ribosomal RNA small subunit methyltransferase I	rsmI	Synechocystis sp. (strain PCC 6803 / Kazusa)	https://www.uniprot.org/uniprot/P74038
AH-01_GM000231	62.7	2e-64	Q64YL9	Thymidine kinase	tdk	Bacteroides fragilis (strain YCH46)	https://www.uniprot.org/uniprot/Q64YL9
AH-01_GM000233	53.7	2.8e-35	A6VKX7	Large-conductance mechanosensitive channel	mscL	Actinobacillus succinogenes (strain ATCC 55618 / 130Z)	https://www.uniprot.org/uniprot/A6VKX7
AH-01_GM000234	86.4	6.4e-132	A5FAQ5	3-methyl-2-oxobutanoate hydroxymethyltransferase	panB	Flavobacterium johnsoniae (strain ATCC 17061 / DSM 2064 / UW101)	https://www.uniprot.org/uniprot/A5FAQ5
AH-01_GM000236	47.9	1.5e-114	P39616	Putative aldehyde dehydrogenase YwdH	ywdH	Bacillus subtilis (strain 168)	https://www.uniprot.org/uniprot/P39616
AH-01_GM000238	58.5	8.6e-248	P15623	Glutamine synthetase	glnA	Bacteroides fragilis (strain YCH46)	https://www.uniprot.org/uniprot/P15623
AH-01_GM000254	79.8	1e-162	A6GXC2	Phosphoserine aminotransferase	serC	Flavobacterium psychrophilum (strain JIP02/86 / ATCC 49511)	https://www.uniprot.org/uniprot/A6GXC2
AH-01_GM000256	41.2	3e-08	P00208	Ferredoxin	fdx	Allochromatium vinosum (strain ATCC 17899 / DSM 180 / NBRC 103801 / NCIMB 10441 / D)	https://www.uniprot.org/uniprot/P00208
AH-01_GM000258	73.8	8e-24	Q11SD8	Putative membrane protein insertion efficiency factor	CHU_2420	Cytophaga hutchinsonii (strain ATCC 33406 / NCIMB 9469)	https://www.uniprot.org/uniprot/Q11SD8
AH-01_GM000259	67.1	3.7e-202	A6GX80	Cysteine--tRNA ligase	cysS	Flavobacterium psychrophilum (strain JIP02/86 / ATCC 49511)	https://www.uniprot.org/uniprot/A6GX80
AH-01_GM000260	79.8	8.2e-101	A5FHM7	GTP cyclohydrolase 1	folE	Flavobacterium johnsoniae (strain ATCC 17061 / DSM 2064 / UW101)	https://www.uniprot.org/uniprot/A5FHM7
AH-01_GM000266	41.5	4.3e-31	Q8K9X3	Dihydrofolate synthase/folylpolyglutamate synthase	folC	Buchnera aphidicola subsp. Schizaphis graminum (strain Sg)	https://www.uniprot.org/uniprot/Q8K9X3
AH-01_GM000273	49	1.3e-60	Q72J02	Sulfur carrier protein adenylyltransferase	ttuC	Thermus thermophilus (strain HB27 / ATCC BAA-163 / DSM 7039)	https://www.uniprot.org/uniprot/Q72J02
AH-01_GM000275	48.9	2.2e-27	Q8YRR1	Cyclic pyranopterin monophosphate synthase	moaC	Nostoc sp. (strain PCC 7120 / SAG 25.82 / UTEX 2576)	https://www.uniprot.org/uniprot/Q8YRR1
AH-01_GM000276	41.4	1.9e-63	Q54NM6	Molybdenum cofactor biosynthesis protein 1	mocs1	Dictyostelium discoideum	https://www.uniprot.org/uniprot/Q54NM6
AH-01_GM000277	40.7	2.7e-64	Q9RA46	Probable nitrate/nitrite antiporter NarK1	narK1	Thermus thermophilus	https://www.uniprot.org/uniprot/Q9RA46
AH-01_GM000278	49.4	8.9e-69	Q9RA45	Probable nitrate/nitrite antiporter NarK2	narK2	Thermus thermophilus	https://www.uniprot.org/uniprot/Q9RA45
AH-01_GM000280	46	9.8e-175	P42434	Assimilatory nitrate reductase catalytic subunit	nasC	Bacillus subtilis (strain 168)	https://www.uniprot.org/uniprot/P42434
AH-01_GM000289	41.6	1.4e-141	Q55681	ATP-dependent DNA helicase RecG	recG	Synechocystis sp. (strain PCC 6803 / Kazusa)	https://www.uniprot.org/uniprot/Q55681
AH-01_GM000291	55.4	4.3e-180	O31716	Uncharacterized ABC transporter ATP-binding protein YkpA	ykpA	Bacillus subtilis (strain 168)	https://www.uniprot.org/uniprot/O31716
AH-01_GM000298	69.3	3.7e-95	A6GWZ0	Tryptophan synthase alpha chain	trpA	Flavobacterium psychrophilum (strain JIP02/86 / ATCC 49511)	https://www.uniprot.org/uniprot/A6GWZ0
AH-01_GM000299	67.5	8.5e-157	A6L9K4	Tryptophan synthase beta chain	trpB	Parabacteroides distasonis (strain ATCC 8503 / DSM 20701 / CIP 104284 / JCM 5825 / NCTC 11152)	https://www.uniprot.org/uniprot/A6L9K4
AH-01_GM000300	40.9	3.2e-35	A6L9J9	N-(5'-phosphoribosyl)anthranilate isomerase	trpF	Parabacteroides distasonis (strain ATCC 8503 / DSM 20701 / CIP 104284 / JCM 5825 / NCTC 11152)	https://www.uniprot.org/uniprot/A6L9J9
AH-01_GM000301	49	1.4e-59	Q8AAD6	Indole-3-glycerol phosphate synthase	trpC	Bacteroides thetaiotaomicron (strain ATCC 29148 / DSM 2079 / NCTC 10582 / E50 / VPI-5482)	https://www.uniprot.org/uniprot/Q8AAD6
AH-01_GM000302	76.6	8.1e-125	A6GWZ4	Anthranilate phosphoribosyltransferase	trpD	Flavobacterium psychrophilum (strain JIP02/86 / ATCC 49511)	https://www.uniprot.org/uniprot/A6GWZ4
AH-01_GM000303	44.3	2.2e-39	P44339	Putative anthranilate synthase component II	HI_1171	Haemophilus influenzae (strain ATCC 51907 / DSM 11121 / KW20 / Rd)	https://www.uniprot.org/uniprot/P44339
AH-01_GM000304	47.6	1.1e-59	P18267	Anthranilate synthase component 1	trpE	Bacillus pumilus	https://www.uniprot.org/uniprot/P18267
AH-01_GM000311	85.9	1.5e-147	A6GZL9	Lipoyl synthase	lipA	Flavobacterium psychrophilum (strain JIP02/86 / ATCC 49511)	https://www.uniprot.org/uniprot/A6GZL9
AH-01_GM000312	52.6	2.4e-96	P17721	Glyceraldehyde-3-phosphate dehydrogenase	gap	Thermotoga maritima (strain ATCC 43589 / MSB8 / DSM 3109 / JCM 10099)	https://www.uniprot.org/uniprot/P17721
AH-01_GM000314	47.9	3.7e-71	P77834	Purine nucleoside phosphorylase 1	punA	Geobacillus stearothermophilus	https://www.uniprot.org/uniprot/P77834
AH-01_GM000315	57	7.1e-112	A6GZM3	Tetraacyldisaccharide 4'-kinase	lpxK	Flavobacterium psychrophilum (strain JIP02/86 / ATCC 49511)	https://www.uniprot.org/uniprot/A6GZM3
AH-01_GM000320	54.8	7.7e-71	Q8Z1V3	23S rRNA pseudouridine(2604) synthase	rluF	Salmonella typhi	https://www.uniprot.org/uniprot/Q8Z1V3
AH-01_GM000322	41.5	8e-25	Q9I3A4	Putative esterase PA1618	PA1618	Pseudomonas aeruginosa (strain ATCC 15692 / DSM 22644 / CIP 104116 / JCM 14847 / LMG 12228 / 1C / PRS 101 / PAO1)	https://www.uniprot.org/uniprot/Q9I3A4
AH-01_GM000324	40.5	1.5e-36	Q81ST8	N-acetyl-alpha-D-glucosaminyl L-malate deacetylase 1	bshB1	Bacillus anthracis	https://www.uniprot.org/uniprot/Q81ST8
AH-01_GM000326	42.1	9.7e-156	Q8DEW2	Polyphosphate kinase	ppk	Vibrio vulnificus (strain CMCP6)	https://www.uniprot.org/uniprot/Q8DEW2
AH-01_GM000329	57.4	1.1e-113	Q6T1W6	dTDP-3-amino-3,6-dideoxy-alpha-D-galactopyranose transaminase	fdtB	Aneurinibacillus thermoaerophilus	https://www.uniprot.org/uniprot/Q6T1W6
AH-01_GM000332	54.7	9.2e-69	P51831	3-oxoacyl-[acyl-carrier-protein] reductase FabG	fabG	Bacillus subtilis (strain 168)	https://www.uniprot.org/uniprot/P51831
AH-01_GM000336	72.4	2.8e-93	A5FFT1	Uracil-DNA glycosylase	ung	Flavobacterium johnsoniae (strain ATCC 17061 / DSM 2064 / UW101)	https://www.uniprot.org/uniprot/A5FFT1
AH-01_GM000343	42.9	2.5e-10	A8AC05	Protein translation factor SUI1 homolog	Igni_1281	Ignicoccus hospitalis (strain KIN4/I / DSM 18386 / JCM 14125)	https://www.uniprot.org/uniprot/A8AC05
AH-01_GM000345	43	1.6e-67	P37941	2-oxoisovalerate dehydrogenase subunit beta	bfmBAB	Bacillus subtilis (strain 168)	https://www.uniprot.org/uniprot/P37941
AH-01_GM000346	41.9	2.4e-113	P15288	Cytosol non-specific dipeptidase	pepD	Escherichia coli (strain K12)	https://www.uniprot.org/uniprot/P15288
AH-01_GM000354	84.2	0	A6GXA1	Probable potassium transport system protein kup	kup	Flavobacterium psychrophilum (strain JIP02/86 / ATCC 49511)	https://www.uniprot.org/uniprot/A6GXA1
AH-01_GM000360	40.1	5.8e-18	P64804	Cob(I)yrinic acid a,c-diamide adenosyltransferase	BQ2027_MB1347C	Mycobacterium bovis (strain ATCC BAA-935 / AF2122/97)	https://www.uniprot.org/uniprot/P64804
AH-01_GM000361	43.1	1.7e-65	P9WPR2	Uncharacterized protein MT2916	MT2916	Mycobacterium tuberculosis (strain CDC 1551 / Oshkosh)	https://www.uniprot.org/uniprot/P9WPR2
AH-01_GM000363	46.6	5.8e-72	C5DAN8	Cobalt-precorrin-5B C(1)-methyltransferase	cbiD	Geobacillus sp. (strain WCH70)	https://www.uniprot.org/uniprot/C5DAN8
AH-01_GM000365	46.8	7.3e-59	Q58973	Cobalt-precorrin-4 C(11)-methyltransferase	cbiF	Methanocaldococcus jannaschii (strain ATCC 43067 / DSM 2661 / JAL-1 / JCM 10045 / NBRC 100440)	https://www.uniprot.org/uniprot/Q58973
AH-01_GM000367	42.7	1.7e-42	Q92PC8	5,6-dimethylbenzimidazole synthase	bluB	Rhizobium meliloti (strain 1021)	https://www.uniprot.org/uniprot/Q92PC8
AH-01_GM000368	40.2	2.9e-52	O87689	Cobalt-factor III methyltransferase	cbiH60	Bacillus megaterium	https://www.uniprot.org/uniprot/O87689
AH-01_GM000375	41.5	1.6e-57	Q8XLK2	Cobalamin biosynthesis protein CobD	cobD	Clostridium perfringens (strain 13 / Type A)	https://www.uniprot.org/uniprot/Q8XLK2
AH-01_GM000377	62.9	9.1e-177	A6LBQ5	Cobyric acid synthase	cobQ	Parabacteroides distasonis (strain ATCC 8503 / DSM 20701 / CIP 104284 / JCM 5825 / NCTC 11152)	https://www.uniprot.org/uniprot/A6LBQ5
AH-01_GM000379	40.5	2.8e-76	Q8RCP4	Cobyrinate a,c-diamide synthase	cbiA	Caldanaerobacter subterraneus subsp. tengcongensis (strain DSM 15242 / JCM 11007 / NBRC 100824 / MB4)	https://www.uniprot.org/uniprot/Q8RCP4
AH-01_GM000380	51.6	3.4e-59	O34557	Ribulose-phosphate 3-epimerase	rpe	Bacillus subtilis (strain 168)	https://www.uniprot.org/uniprot/O34557
AH-01_GM000382	51.7	2.2e-97	P29937	Protein CobW	cobW	Pseudomonas denitrificans	https://www.uniprot.org/uniprot/P29937
AH-01_GM000383	43.3	6.5e-304	Q9HZQ3	Aerobic cobaltochelatase subunit CobN	cobN	Pseudomonas aeruginosa (strain ATCC 15692 / DSM 22644 / CIP 104116 / JCM 14847 / LMG 12228 / 1C / PRS 101 / PAO1)	https://www.uniprot.org/uniprot/Q9HZQ3
AH-01_GM000388	64	3.5e-93	P9WNP4	1,4-dihydroxy-2-naphthoyl-CoA synthase	menB	Mycobacterium tuberculosis (strain CDC 1551 / Oshkosh)	https://www.uniprot.org/uniprot/P9WNP4
AH-01_GM000391	60.8	1.5e-148	Q5KZ39	Peptidase T	pepT	Geobacillus kaustophilus (strain HTA426)	https://www.uniprot.org/uniprot/Q5KZ39
AH-01_GM000398	42.7	2.6e-43	P50059	Superoxide dismutase [Mn] 2	sodA2	Leptolyngbya boryana	https://www.uniprot.org/uniprot/P50059
AH-01_GM000400	53.7	2.8e-61	Q11Y69	Phosphatidylserine decarboxylase proenzyme	psd	Cytophaga hutchinsonii (strain ATCC 33406 / NCIMB 9469)	https://www.uniprot.org/uniprot/Q11Y69
AH-01_GM000403	59.6	1.1e-211	A6LD25	ATP-dependent zinc metalloprotease FtsH	ftsH	Parabacteroides distasonis (strain ATCC 8503 / DSM 20701 / CIP 104284 / JCM 5825 / NCTC 11152)	https://www.uniprot.org/uniprot/A6LD25
AH-01_GM000404	42.2	2.9e-15	P54457	Ribosomal silencing factor RsfS	rsfS	Bacillus subtilis (strain 168)	https://www.uniprot.org/uniprot/P54457
AH-01_GM000415	40.8	8.5e-24	Q52527	Nitric oxide reductase subunit C	norC	Pseudomonas stutzeri	https://www.uniprot.org/uniprot/Q52527
AH-01_GM000416	44.4	8.1e-108	P98008	Nitric oxide reductase subunit B	norB	Pseudomonas stutzeri	https://www.uniprot.org/uniprot/P98008
AH-01_GM000418	54.1	9e-113	Q02219	Copper-containing nitrite reductase	aniA	Neisseria gonorrhoeae	https://www.uniprot.org/uniprot/Q02219
AH-01_GM000421	52.5	2.1e-68	Q51858	Protein CbbQ	cbbQ	Hydrogenophilus thermoluteolus	https://www.uniprot.org/uniprot/Q51858
AH-01_GM000431	56.6	4.1e-206	A0LG91	Acetyl-coenzyme A synthetase	acsA	Syntrophobacter fumaroxidans (strain DSM 10017 / MPOB)	https://www.uniprot.org/uniprot/A0LG91
AH-01_GM000438	42.3	2.3e-40	O66631	Pyridoxal phosphate homeostasis protein	aq_274	Aquifex aeolicus (strain VF5)	https://www.uniprot.org/uniprot/O66631
AH-01_GM000439	40.1	3e-44	P44243	Uncharacterized protein HI_1523	HI_1523	Haemophilus influenzae (strain ATCC 51907 / DSM 11121 / KW20 / Rd)	https://www.uniprot.org/uniprot/P44243
AH-01_GM000487	53	1.1e-20	P44193	Uncharacterized protein HI_1422	HI_1422	Haemophilus influenzae (strain ATCC 51907 / DSM 11121 / KW20 / Rd)	https://www.uniprot.org/uniprot/P44193
AH-01_GM000500	43.8	1.6e-25	P40761	Uncharacterized protein YuxK	yuxK	Bacillus subtilis (strain 168)	https://www.uniprot.org/uniprot/P40761
AH-01_GM000502	55.7	8.5e-179	P45127	Energy-dependent translational throttle protein EttA	ettA	Haemophilus influenzae (strain ATCC 51907 / DSM 11121 / KW20 / Rd)	https://www.uniprot.org/uniprot/P45127
AH-01_GM000517	52.4	1.4e-131	O05940	Dihydrolipoyl dehydrogenase	lpdA	Rhizobium etli (strain CFN 42 / ATCC 51251)	https://www.uniprot.org/uniprot/O05940
AH-01_GM000518	42.5	1.5e-72	P50401	Exoglucanase A	cbhA	Cellulomonas fimi (strain ATCC 484 / DSM 20113 / JCM 1341 / NBRC 15513 / NCIMB 8980 / NCTC 7547)	https://www.uniprot.org/uniprot/P50401
AH-01_GM000525	49.4	1e-68	Q1IKD0	2-dehydro-3-deoxyphosphooctonate aldolase	kdsA	Koribacter versatilis (strain Ellin345)	https://www.uniprot.org/uniprot/Q1IKD0
AH-01_GM000528	90.4	8.6e-111	A6GYG9	Probable transaldolase	tal	Flavobacterium psychrophilum (strain JIP02/86 / ATCC 49511)	https://www.uniprot.org/uniprot/A6GYG9
AH-01_GM000534	61.2	1.6e-148	Q54J34	Adenylosuccinate lyase	purB	Dictyostelium discoideum	https://www.uniprot.org/uniprot/Q54J34
AH-01_GM000543	47.1	6.7e-122	Q8RBH4	Histidine ammonia-lyase	hutH	Caldanaerobacter subterraneus subsp. tengcongensis (strain DSM 15242 / JCM 11007 / NBRC 100824 / MB4)	https://www.uniprot.org/uniprot/Q8RBH4
AH-01_GM000544	86.7	1.8e-182	A6GXW3	Aminomethyltransferase	gcvT	Flavobacterium psychrophilum (strain JIP02/86 / ATCC 49511)	https://www.uniprot.org/uniprot/A6GXW3
AH-01_GM000548	71.5	0	A0M5I5	Valine--tRNA ligase	valS	Gramella forsetii (strain KT0803)	https://www.uniprot.org/uniprot/A0M5I5
AH-01_GM000550	80.1	3.1e-109	A6GYA2	3-deoxy-manno-octulosonate cytidylyltransferase	kdsB	Flavobacterium psychrophilum (strain JIP02/86 / ATCC 49511)	https://www.uniprot.org/uniprot/A6GYA2
AH-01_GM000554	86.4	4.6e-118	A5FGS7	Probable transcriptional regulatory protein Fjoh_2560	Fjoh_2560	Flavobacterium johnsoniae (strain ATCC 17061 / DSM 2064 / UW101)	https://www.uniprot.org/uniprot/A5FGS7
AH-01_GM000556	51.7	4.9e-31	B2V099	Methylglyoxal synthase	mgsA	Clostridium botulinum (strain Alaska E43 / Type E3)	https://www.uniprot.org/uniprot/B2V099
AH-01_GM000558	65.9	2.1e-121	B7LQ20	Glyceraldehyde-3-phosphate dehydrogenase	gapA	Escherichia fergusonii (strain ATCC 35469 / DSM 13698 / CDC 0568-73)	https://www.uniprot.org/uniprot/B7LQ20
AH-01_GM000559	53.1	5.8e-95	Q8A624	ATP-dependent 6-phosphofructokinase 2	pfkA2	Bacteroides thetaiotaomicron (strain ATCC 29148 / DSM 2079 / NCTC 10582 / E50 / VPI-5482)	https://www.uniprot.org/uniprot/Q8A624
AH-01_GM000561	72.4	1.1e-141	A0M1X3	tRNA N6-adenosine threonylcarbamoyltransferase	tsaD	Gramella forsetii (strain KT0803)	https://www.uniprot.org/uniprot/A0M1X3
AH-01_GM000565	40.6	3.6e-49	Q8TL28	Ulilysin	MA_3214	Methanosarcina acetivorans (strain ATCC 35395 / DSM 2834 / JCM 12185 / C2A)	https://www.uniprot.org/uniprot/Q8TL28
AH-01_GM000566	46.9	6.9e-68	P64431	Uncharacterized protein YpfJ	ypfJ	Escherichia coli O157:H7	https://www.uniprot.org/uniprot/P64431
AH-01_GM000571	42.7	1.8e-87	P0ADT7	Putative acid--amine ligase YgiC	ygiC	Escherichia coli O157:H7	https://www.uniprot.org/uniprot/P0ADT7
AH-01_GM000575	88.4	1.8e-279	A6H0U1	CTP synthase	pyrG	Flavobacterium psychrophilum (strain JIP02/86 / ATCC 49511)	https://www.uniprot.org/uniprot/A6H0U1
AH-01_GM000577	47.1	1.8e-12	P0AD41	Uncharacterized protein YpeB	ypeB	Escherichia coli O157:H7	https://www.uniprot.org/uniprot/P0AD41
AH-01_GM000581	88.6	9.8e-267	A5FHB4	GMP synthase [glutamine-hydrolyzing]	guaA	Flavobacterium johnsoniae (strain ATCC 17061 / DSM 2064 / UW101)	https://www.uniprot.org/uniprot/A5FHB4
AH-01_GM000583	60.4	0	Q5KUG0	Fused isobutyryl-CoA mutase	icmF	Geobacillus kaustophilus (strain HTA426)	https://www.uniprot.org/uniprot/Q5KUG0
AH-01_GM000590	53.1	0	P25239	Type IIS restriction enzyme Eco57I	eco57IR	Escherichia coli	https://www.uniprot.org/uniprot/P25239
AH-01_GM000595	74.2	0	A4Y2G4	Catalase-peroxidase	katG	Shewanella putrefaciens (strain CN-32 / ATCC BAA-453)	https://www.uniprot.org/uniprot/A4Y2G4
AH-01_GM000596	66.7	3.7e-43	P45871	Uncharacterized protein YwkD	ywkD	Bacillus subtilis (strain 168)	https://www.uniprot.org/uniprot/P45871
AH-01_GM000607	40.3	4.2e-82	B5ZXG4	C4-dicarboxylate transport protein	dctA	Rhizobium leguminosarum bv. trifolii (strain WSM2304)	https://www.uniprot.org/uniprot/B5ZXG4
AH-01_GM000608	82.4	4.6e-170	A6GXP5	Chorismate synthase	aroC	Flavobacterium psychrophilum (strain JIP02/86 / ATCC 49511)	https://www.uniprot.org/uniprot/A6GXP5
AH-01_GM000609	87.7	3e-221	A6GXG2	Serine hydroxymethyltransferase	glyA	Flavobacterium psychrophilum (strain JIP02/86 / ATCC 49511)	https://www.uniprot.org/uniprot/A6GXG2
AH-01_GM000610	53.8	6.8e-128	Q1ZXQ1	Fumarylacetoacetase	fah	Dictyostelium discoideum	https://www.uniprot.org/uniprot/Q1ZXQ1
AH-01_GM000612	53.8	4.9e-244	Q64T65	Phenylalanine--tRNA ligase beta subunit	pheT	Bacteroides fragilis (strain YCH46)	https://www.uniprot.org/uniprot/Q64T65
AH-01_GM000616	56.4	2.7e-52	A6Q418	Peptide methionine sulfoxide reductase MsrA	msrA	Nitratiruptor sp. (strain SB155-2)	https://www.uniprot.org/uniprot/A6Q418
AH-01_GM000617	60.2	2.6e-42	Q8DJK9	Peptide methionine sulfoxide reductase MsrB	msrB	Thermosynechococcus elongatus (strain BP-1)	https://www.uniprot.org/uniprot/Q8DJK9
AH-01_GM000618	40.1	3e-44	P44243	Uncharacterized protein HI_1523	HI_1523	Haemophilus influenzae (strain ATCC 51907 / DSM 11121 / KW20 / Rd)	https://www.uniprot.org/uniprot/P44243
AH-01_GM000653	42.5	1.6e-21	O34360	Peptidoglycan L-alanyl-D-glutamate endopeptidase CwlK	cwlK	Bacillus subtilis (strain 168)	https://www.uniprot.org/uniprot/O34360
AH-01_GM000674	40.1	8e-49	Q8TL28	Ulilysin	MA_3214	Methanosarcina acetivorans (strain ATCC 35395 / DSM 2834 / JCM 12185 / C2A)	https://www.uniprot.org/uniprot/Q8TL28
AH-01_GM000683	62.2	7.2e-71	Q8A1M1	Lipoprotein-releasing system ATP-binding protein LolD	lolD	Bacteroides thetaiotaomicron (strain ATCC 29148 / DSM 2079 / NCTC 10582 / E50 / VPI-5482)	https://www.uniprot.org/uniprot/Q8A1M1
AH-01_GM000706	84.8	4.5e-178	A5FMM5	S-adenosylmethionine:tRNA ribosyltransferase-isomerase	queA	Flavobacterium johnsoniae (strain ATCC 17061 / DSM 2064 / UW101)	https://www.uniprot.org/uniprot/A5FMM5
AH-01_GM000707	45.5	1.8e-55	P38446	Nuclease	nucA	Nostoc sp. (strain PCC 7120 / SAG 25.82 / UTEX 2576)	https://www.uniprot.org/uniprot/P38446
AH-01_GM000708	80.9	1.1e-210	A6H1P7	Kynureninase	kynU	Flavobacterium psychrophilum (strain JIP02/86 / ATCC 49511)	https://www.uniprot.org/uniprot/A6H1P7
AH-01_GM000712	75.5	4.4e-202	A5FMP6	Kynurenine 3-monooxygenase	kmo	Flavobacterium johnsoniae (strain ATCC 17061 / DSM 2064 / UW101)	https://www.uniprot.org/uniprot/A5FMP6
AH-01_GM000716	42.7	7.5e-102	P39342	Uncharacterized protein YjgR	yjgR	Escherichia coli (strain K12)	https://www.uniprot.org/uniprot/P39342
AH-01_GM000724	78.1	1.9e-99	A6H1N2	7-carboxy-7-deazaguanine synthase	queE	Flavobacterium psychrophilum (strain JIP02/86 / ATCC 49511)	https://www.uniprot.org/uniprot/A6H1N2
AH-01_GM000732	46.8	6.4e-83	Q5LHG9	3-phosphoshikimate 1-carboxyvinyltransferase	aroA	Bacteroides fragilis (strain ATCC 25285 / DSM 2151 / JCM 11019 / NCTC 9343)	https://www.uniprot.org/uniprot/Q5LHG9
AH-01_GM000733	42.5	6.1e-17	P42979	Uncharacterized protein YpjD	ypjD	Bacillus subtilis (strain 168)	https://www.uniprot.org/uniprot/P42979
AH-01_GM000734	78.7	3.3e-62	A6GW89	D-aminoacyl-tRNA deacylase	dtd	Flavobacterium psychrophilum (strain JIP02/86 / ATCC 49511)	https://www.uniprot.org/uniprot/A6GW89
AH-01_GM000735	76.6	1.7e-144	A6GW90	Small ribosomal subunit biogenesis GTPase RsgA	rsgA	Flavobacterium psychrophilum (strain JIP02/86 / ATCC 49511)	https://www.uniprot.org/uniprot/A6GW90
AH-01_GM000739	84.4	6.9e-171	A6H1B8	Probable dual-specificity RNA methyltransferase RlmN	rlmN	Flavobacterium psychrophilum (strain JIP02/86 / ATCC 49511)	https://www.uniprot.org/uniprot/A6H1B8
AH-01_GM000743	44.1	4.5e-10	Q3APS6	Sec-independent protein translocase protein TatA	tatA	Chlorobium chlorochromatii (strain CaD3)	https://www.uniprot.org/uniprot/Q3APS6
AH-01_GM000747	45.9	6.7e-53	Q93RZ5	Peptidase E	pepE	Streptomyces coelicolor (strain ATCC BAA-471 / A3(2) / M145)	https://www.uniprot.org/uniprot/Q93RZ5
AH-01_GM000755	75.4	4e-228	A6H1H2	2,3-bisphosphoglycerate-independent phosphoglycerate mutase	gpmI	Flavobacterium psychrophilum (strain JIP02/86 / ATCC 49511)	https://www.uniprot.org/uniprot/A6H1H2
AH-01_GM000756	51.7	8.1e-92	P55180	UDP-glucose 4-epimerase	galE	Bacillus subtilis (strain 168)	https://www.uniprot.org/uniprot/P55180
AH-01_GM000757	44.1	9.2e-81	P15263	Pleiotropic regulatory protein	degT	Geobacillus stearothermophilus	https://www.uniprot.org/uniprot/P15263
AH-01_GM000762	68.7	1e-301	A6GWM2	Asp/Glu-specific dipeptidyl-peptidase	dpp11	Flavobacterium psychrophilum (strain JIP02/86 / ATCC 49511)	https://www.uniprot.org/uniprot/A6GWM2
AH-01_GM000767	40	6.3e-13	Q5JMR9	Thioredoxin Y, chloroplastic	Os01g0963400	Oryza sativa subsp. japonica	https://www.uniprot.org/uniprot/Q5JMR9
AH-01_GM000770	42.7	2.7e-201	P00582	DNA polymerase I	polA	Escherichia coli (strain K12)	https://www.uniprot.org/uniprot/P00582
AH-01_GM000771	60.8	8.2e-44	Q14KZ8	50S ribosomal protein L13	rplM	Spiroplasma citri	https://www.uniprot.org/uniprot/Q14KZ8
AH-01_GM000772	89.1	2.1e-61	A6GWU3	30S ribosomal protein S9	rpsI	Flavobacterium psychrophilum (strain JIP02/86 / ATCC 49511)	https://www.uniprot.org/uniprot/A6GWU3
AH-01_GM000773	90.9	2.9e-126	A5FJG9	30S ribosomal protein S2	rpsB	Flavobacterium johnsoniae (strain ATCC 17061 / DSM 2064 / UW101)	https://www.uniprot.org/uniprot/A5FJG9
AH-01_GM000774	93.1	2.1e-166	A5FJI4	Elongation factor Ts	tsf	Flavobacterium johnsoniae (strain ATCC 17061 / DSM 2064 / UW101)	https://www.uniprot.org/uniprot/A5FJI4
AH-01_GM000787	84.5	5.9e-84	A6GWS4	Ribosome-recycling factor	frr	Flavobacterium psychrophilum (strain JIP02/86 / ATCC 49511)	https://www.uniprot.org/uniprot/A6GWS4
AH-01_GM000788	92.3	1.7e-120	A6GWS3	Uridylate kinase	pyrH	Flavobacterium psychrophilum (strain JIP02/86 / ATCC 49511)	https://www.uniprot.org/uniprot/A6GWS3
AH-01_GM000797	42.4	2.6e-128	P76104	Uncharacterized protease YdcP	ydcP	Escherichia coli (strain K12)	https://www.uniprot.org/uniprot/P76104
AH-01_GM000798	44.2	2.7e-64	P71019	Malonyl CoA-acyl carrier protein transacylase	fabD	Bacillus subtilis (strain 168)	https://www.uniprot.org/uniprot/P71019
AH-01_GM000832	45.8	2e-97	Q9SIE1	Bifunctional aspartate aminotransferase and glutamate/aspartate-prephenate aminotransferase	PAT	Arabidopsis thaliana	https://www.uniprot.org/uniprot/Q9SIE1
AH-01_GM000834	74.3	2.2e-84	A6GWQ2	Ribosomal RNA small subunit methyltransferase G	rsmG	Flavobacterium psychrophilum (strain JIP02/86 / ATCC 49511)	https://www.uniprot.org/uniprot/A6GWQ2
AH-01_GM000835	52.1	1e-160	Q54RA2	Delta-1-pyrroline-5-carboxylate dehydrogenase, mitochondrial	DDB_G0283293	Dictyostelium discoideum	https://www.uniprot.org/uniprot/Q54RA2
AH-01_GM000836	44.7	9.1e-20	B7J8G8	Protein ApaG	apaG	Acidithiobacillus ferrooxidans (strain ATCC 23270 / DSM 14882 / CIP 104768 / NCIMB 8455)	https://www.uniprot.org/uniprot/B7J8G8
AH-01_GM000840	49.8	2.2e-71	P50614	Methionine aminopeptidase	map	Clostridium perfringens (strain 13 / Type A)	https://www.uniprot.org/uniprot/P50614
AH-01_GM000841	45.9	2.6e-103	P38942	4-hydroxybutyrate coenzyme A transferase	cat2	Clostridium kluyveri (strain ATCC 8527 / DSM 555 / NCIMB 10680)	https://www.uniprot.org/uniprot/P38942
AH-01_GM000848	43.1	6.9e-91	P72973	Na(+)/H(+) antiporter NhaS4	nhaS4	Synechocystis sp. (strain PCC 6803 / Kazusa)	https://www.uniprot.org/uniprot/P72973
AH-01_GM000851	61.1	2.6e-168	Q11Q97	Asparagine--tRNA ligase	asnS	Cytophaga hutchinsonii (strain ATCC 33406 / NCIMB 9469)	https://www.uniprot.org/uniprot/Q11Q97
AH-01_GM000855	49.2	1.7e-157	O32219	Cadmium, zinc and cobalt-transporting ATPase	cadA	Bacillus subtilis (strain 168)	https://www.uniprot.org/uniprot/O32219
AH-01_GM000857	47.3	5.8e-272	P94177	Cation efflux system protein CzcA	czcA	Alcaligenes sp. (strain CT14)	https://www.uniprot.org/uniprot/P94177
AH-01_GM000861	45.8	5e-161	P98000	Alternative cytochrome c oxidase subunit 1	coxN	Bradyrhizobium diazoefficiens (strain JCM 10833 / IAM 13628 / NBRC 14792 / USDA 110)	https://www.uniprot.org/uniprot/P98000
AH-01_GM000870	69.2	2.9e-185	A6H1Q0	NADH-quinone oxidoreductase subunit N	nuoN	Flavobacterium psychrophilum (strain JIP02/86 / ATCC 49511)	https://www.uniprot.org/uniprot/A6H1Q0
AH-01_GM000872	44.3	2.2e-127	Q56227	NADH-quinone oxidoreductase subunit 12	nqo12	Thermus thermophilus (strain HB8 / ATCC 27634 / DSM 579)	https://www.uniprot.org/uniprot/Q56227
AH-01_GM000873	86.8	2e-44	A5FKJ7	NADH-quinone oxidoreductase subunit K	nuoK	Flavobacterium johnsoniae (strain ATCC 17061 / DSM 2064 / UW101)	https://www.uniprot.org/uniprot/A5FKJ7
AH-01_GM000875	78.9	1.7e-77	A6H1Q5	NADH-quinone oxidoreductase subunit I	nuoI	Flavobacterium psychrophilum (strain JIP02/86 / ATCC 49511)	https://www.uniprot.org/uniprot/A6H1Q5
AH-01_GM000877	72.1	2.3e-150	A6H1Q6	NADH-quinone oxidoreductase subunit H	nuoH	Flavobacterium psychrophilum (strain JIP02/86 / ATCC 49511)	https://www.uniprot.org/uniprot/A6H1Q6
AH-01_GM000881	50.5	2.8e-124	P56913	NADH-quinone oxidoreductase subunit F 2	nuoF2	Rhizobium meliloti (strain 1021)	https://www.uniprot.org/uniprot/P56913
AH-01_GM000884	45.3	2.3e-37	P04394	NADH dehydrogenase [ubiquinone] flavoprotein 2, mitochondrial	NDUFV2	Bos taurus	https://www.uniprot.org/uniprot/P04394
AH-01_GM000885	81.6	1.5e-204	A5FKI7	NADH-quinone oxidoreductase subunit D	nuoD	Flavobacterium johnsoniae (strain ATCC 17061 / DSM 2064 / UW101)	https://www.uniprot.org/uniprot/A5FKI7
AH-01_GM000886	41.6	5.5e-28	B3PY58	NADH-quinone oxidoreductase subunit C 2	nuoC2	Rhizobium etli (strain CIAT 652)	https://www.uniprot.org/uniprot/B3PY58
AH-01_GM000887	87.4	5e-88	A5FKI9	NADH-quinone oxidoreductase subunit B	nuoB	Flavobacterium johnsoniae (strain ATCC 17061 / DSM 2064 / UW101)	https://www.uniprot.org/uniprot/A5FKI9
AH-01_GM000888	78	2.6e-44	A6H1R4	NADH-quinone oxidoreductase subunit A	nuoA	Flavobacterium psychrophilum (strain JIP02/86 / ATCC 49511)	https://www.uniprot.org/uniprot/A6H1R4
AH-01_GM000890	40.2	6e-14	P68573	SPBc2 prophage-derived DNA-binding protein HU 2	hup2	Bacillus subtilis (strain 168)	https://www.uniprot.org/uniprot/P68573
AH-01_GM000891	43.2	2.3e-46	Q99P21	Adenine DNA glycosylase	Mutyh	Mus musculus	https://www.uniprot.org/uniprot/Q99P21
AH-01_GM000892	42.9	1.8e-21	P44409	Single-stranded DNA-binding protein	ssb	Haemophilus influenzae (strain ATCC 51907 / DSM 11121 / KW20 / Rd)	https://www.uniprot.org/uniprot/P44409
AH-01_GM000899	87.2	5e-38	A5FJP6	50S ribosomal protein L27	rpmA	Flavobacterium johnsoniae (strain ATCC 17061 / DSM 2064 / UW101)	https://www.uniprot.org/uniprot/A5FJP6
AH-01_GM000900	83	4.2e-58	A5FJP5	50S ribosomal protein L21	rplU	Flavobacterium johnsoniae (strain ATCC 17061 / DSM 2064 / UW101)	https://www.uniprot.org/uniprot/A5FJP5
AH-01_GM000903	40.6	9.3e-48	P37545	Uncharacterized metal-dependent hydrolase YabD	yabD	Bacillus subtilis (strain 168)	https://www.uniprot.org/uniprot/P37545
AH-01_GM000905	41.5	1.8e-67	P0A963	L-asparaginase 1	ansA	Escherichia coli O157:H7	https://www.uniprot.org/uniprot/P0A963
AH-01_GM000908	61.7	1e-77	A5FJK8	Geranylgeranylglyceryl phosphate synthase	Fjoh_1584	Flavobacterium johnsoniae (strain ATCC 17061 / DSM 2064 / UW101)	https://www.uniprot.org/uniprot/A5FJK8
AH-01_GM000910	88.8	9.1e-229	A5FJK3	Adenosylhomocysteinase	ahcY	Flavobacterium johnsoniae (strain ATCC 17061 / DSM 2064 / UW101)	https://www.uniprot.org/uniprot/A5FJK3
AH-01_GM000916	46.2	1.5e-52	A0QZ12	Polyprenol monophosphomannose synthase	ppm1	Mycobacterium smegmatis (strain ATCC 700084 / mc(2)155)	https://www.uniprot.org/uniprot/A0QZ12
AH-01_GM000922	56.1	6.3e-30	A6GZS1	CRISPR-associated endoribonuclease Cas2	cas2	Flavobacterium psychrophilum (strain JIP02/86 / ATCC 49511)	https://www.uniprot.org/uniprot/A6GZS1
AH-01_GM000926	79.1	2.3e-200	A6GW04	Tyrosine--tRNA ligase	tyrS	Flavobacterium psychrophilum (strain JIP02/86 / ATCC 49511)	https://www.uniprot.org/uniprot/A6GW04
AH-01_GM000928	43.5	3.1e-145	B2RIT0	Dipeptidyl-peptidase 5	dpp5	Porphyromonas gingivalis (strain ATCC 33277 / DSM 20709 / CIP 103683 / JCM 12257 / NCTC 11834 / 2561)	https://www.uniprot.org/uniprot/B2RIT0
AH-01_GM000929	60.7	3e-217	Q8AAB1	Glutamine--fructose-6-phosphate aminotransferase [isomerizing]	glmS	Bacteroides thetaiotaomicron (strain ATCC 29148 / DSM 2079 / NCTC 10582 / E50 / VPI-5482)	https://www.uniprot.org/uniprot/Q8AAB1
AH-01_GM000932	66	3.5e-104	A6GVV3	Pantothenate synthetase	panC	Flavobacterium psychrophilum (strain JIP02/86 / ATCC 49511)	https://www.uniprot.org/uniprot/A6GVV3
AH-01_GM000933	79.3	6.1e-47	A6GVV2	Aspartate 1-decarboxylase	panD	Flavobacterium psychrophilum (strain JIP02/86 / ATCC 49511)	https://www.uniprot.org/uniprot/A6GVV2
AH-01_GM000936	50.2	1.6e-122	P37572	DNA repair protein RadA	radA	Bacillus subtilis (strain 168)	https://www.uniprot.org/uniprot/P37572
AH-01_GM000940	48.8	7e-91	P0A9T4	Protein tas	tas	Escherichia coli (strain K12)	https://www.uniprot.org/uniprot/P0A9T4
AH-01_GM000942	42.6	8e-52	P37454	Exodeoxyribonuclease	exoA	Bacillus subtilis (strain 168)	https://www.uniprot.org/uniprot/P37454
AH-01_GM000945	45.1	5.1e-15	Q4ULW1	Endolytic peptidoglycan transglycosylase RlpA	rlpA	Rickettsia felis (strain ATCC VR-1525 / URRWXCal2)	https://www.uniprot.org/uniprot/Q4ULW1
AH-01_GM000946	48.7	4.9e-31	A3DIJ8	Inorganic triphosphatase	Cthe_2577	Clostridium thermocellum (strain ATCC 27405 / DSM 1237 / NBRC 103400 / NCIMB 10682 / NRRL B-4536 / VPI 7372)	https://www.uniprot.org/uniprot/A3DIJ8
AH-01_GM000947	55.3	1.6e-98	Q8UJK7	DNA polymerase IV 2	dinB2	Agrobacterium fabrum (strain C58 / ATCC 33970)	https://www.uniprot.org/uniprot/Q8UJK7
AH-01_GM000948	43.1	1.3e-100	Q46078	Pyruvate kinase	pyk	Corynebacterium glutamicum (strain ATCC 13032 / DSM 20300 / JCM 1318 / LMG 3730 / NCIMB 10025)	https://www.uniprot.org/uniprot/Q46078
AH-01_GM000951	58.9	1.9e-64	A0M7A5	ATP-dependent dethiobiotin synthetase BioD	bioD	Gramella forsetii (strain KT0803)	https://www.uniprot.org/uniprot/A0M7A5
AH-01_GM000954	46.4	4.2e-18	P70949	Fe-S protein maturation auxiliary factor YitW	yitW	Bacillus subtilis (strain 168)	https://www.uniprot.org/uniprot/P70949
AH-01_GM000955	43.8	2.8e-22	Q52742	Uncharacterized SufE-like protein RHE_CH01250	RHE_CH01250	Rhizobium etli (strain CFN 42 / ATCC 51251)	https://www.uniprot.org/uniprot/Q52742
AH-01_GM000957	49.4	6e-118	O32164	Cysteine desulfurase SufS	sufS	Bacillus subtilis (strain 168)	https://www.uniprot.org/uniprot/O32164
AH-01_GM000966	43.9	8.9e-67	P94474	Uncharacterized protein YeaC	yeaC	Bacillus subtilis (strain 168)	https://www.uniprot.org/uniprot/P94474
AH-01_GM000968	72.6	2.6e-103	A6GW45	Ribonuclease 3	rnc	Flavobacterium psychrophilum (strain JIP02/86 / ATCC 49511)	https://www.uniprot.org/uniprot/A6GW45
AH-01_GM000969	52.4	1.2e-116	O34340	3-oxoacyl-[acyl-carrier-protein] synthase 2	fabF	Bacillus subtilis (strain 168)	https://www.uniprot.org/uniprot/O34340
AH-01_GM000970	98.7	2.1e-35	A5FKU7	Acyl carrier protein	acpP	Flavobacterium johnsoniae (strain ATCC 17061 / DSM 2064 / UW101)	https://www.uniprot.org/uniprot/A5FKU7
AH-01_GM000972	55	6.3e-39	A4J7B3	Ribonuclease H	rnhA	Desulfotomaculum reducens (strain MI-1)	https://www.uniprot.org/uniprot/A4J7B3
AH-01_GM000973	48.6	1e-41	B2RI39	Lipoprotein signal peptidase	lspA	Porphyromonas gingivalis (strain ATCC 33277 / DSM 20709 / CIP 103683 / JCM 12257 / NCTC 11834 / 2561)	https://www.uniprot.org/uniprot/B2RI39
AH-01_GM000975	61.4	0	Q5LCU8	Isoleucine--tRNA ligase	ileS	Bacteroides fragilis (strain ATCC 25285 / DSM 2151 / JCM 11019 / NCTC 9343)	https://www.uniprot.org/uniprot/Q5LCU8
AH-01_GM000978	57	9.2e-74	A5FM31	DNA repair protein RecO	recO	Flavobacterium johnsoniae (strain ATCC 17061 / DSM 2064 / UW101)	https://www.uniprot.org/uniprot/A5FM31
AH-01_GM000981	66.9	1e-171	P95544	NAD(P)-specific glutamate dehydrogenase	gdhA	Prevotella ruminicola	https://www.uniprot.org/uniprot/P95544
AH-01_GM000983	53.8	1.5e-110	O05394	Cystathionine gamma-lyase	mccB	Bacillus subtilis (strain 168)	https://www.uniprot.org/uniprot/O05394
AH-01_GM000984	51.8	7.7e-142	P46562	Putative aldehyde dehydrogenase family 7 member A1 homolog	alh-9	Caenorhabditis elegans	https://www.uniprot.org/uniprot/P46562
AH-01_GM000985	52.1	9.2e-47	Q4UT95	3-hydroxyanthranilate 3,4-dioxygenase	nbaC	Xanthomonas campestris pv. campestris (strain 8004)	https://www.uniprot.org/uniprot/Q4UT95
AH-01_GM000990	83.6	6.2e-198	A6H294	GTPase HflX	hflX	Flavobacterium psychrophilum (strain JIP02/86 / ATCC 49511)	https://www.uniprot.org/uniprot/A6H294
AH-01_GM000998	47.1	4.1e-21	Q5P7U0	Putative iron-sulfur cluster insertion protein ErpA	erpA	Aromatoleum aromaticum (strain EbN1)	https://www.uniprot.org/uniprot/Q5P7U0
AH-01_GM000999	70.1	2e-197	Q55790	UPF0051 protein slr0074	slr0074	Synechocystis sp. (strain PCC 6803 / Kazusa)	https://www.uniprot.org/uniprot/Q55790
AH-01_GM001001	64.7	1.7e-86	Q55791	Probable ATP-dependent transporter slr0075	slr0075	Synechocystis sp. (strain PCC 6803 / Kazusa)	https://www.uniprot.org/uniprot/Q55791
AH-01_GM001005	89.7	6.1e-180	A6GVW9	Phenylalanine--tRNA ligase alpha subunit	pheS	Flavobacterium psychrophilum (strain JIP02/86 / ATCC 49511)	https://www.uniprot.org/uniprot/A6GVW9
AH-01_GM001011	49.6	8.9e-103	Q46856	Alcohol dehydrogenase YqhD	yqhD	Escherichia coli (strain K12)	https://www.uniprot.org/uniprot/Q46856
AH-01_GM001012	41.4	4e-35	B5YD80	Endonuclease V	nfi	Dictyoglomus thermophilum (strain ATCC 35947 / DSM 3960 / H-6-12)	https://www.uniprot.org/uniprot/B5YD80
AH-01_GM001031	43.6	5.7e-28	Q5UR67	N-glycosidase R617	MIMI_R617	Acanthamoeba polyphaga mimivirus	https://www.uniprot.org/uniprot/Q5UR67
AH-01_GM001035	66.7	4.8e-62	A5FLZ4	Probable RNA 2'-phosphotransferase	kptA	Flavobacterium johnsoniae (strain ATCC 17061 / DSM 2064 / UW101)	https://www.uniprot.org/uniprot/A5FLZ4
AH-01_GM001039	77.2	1.5e-90	A6GVY8	Probable nicotinate-nucleotide adenylyltransferase	nadD	Flavobacterium psychrophilum (strain JIP02/86 / ATCC 49511)	https://www.uniprot.org/uniprot/A6GVY8
AH-01_GM001041	53.5	1.3e-51	Q11XI0	Guanylate kinase	gmk	Cytophaga hutchinsonii (strain ATCC 33406 / NCIMB 9469)	https://www.uniprot.org/uniprot/Q11XI0
AH-01_GM001044	43.9	5.7e-61	P55929	Cytochrome c551 peroxidase	ccp	Nitrosomonas europaea (strain ATCC 19718 / CIP 103999 / KCTC 2705 / NBRC 14298)	https://www.uniprot.org/uniprot/P55929
AH-01_GM001051	94	3.2e-270	A5FLS1	ATP synthase subunit beta	atpD	Flavobacterium johnsoniae (strain ATCC 17061 / DSM 2064 / UW101)	https://www.uniprot.org/uniprot/A5FLS1
AH-01_GM001067	40.1	3e-44	P44243	Uncharacterized protein HI_1523	HI_1523	Haemophilus influenzae (strain ATCC 51907 / DSM 11121 / KW20 / Rd)	https://www.uniprot.org/uniprot/P44243
AH-01_GM001102	41.7	4.5e-21	O34360	Peptidoglycan L-alanyl-D-glutamate endopeptidase CwlK	cwlK	Bacillus subtilis (strain 168)	https://www.uniprot.org/uniprot/O34360
AH-01_GM001123	41.5	5.3e-08	P0AFJ3	Protein PhnA	phnA	Escherichia coli O157:H7	https://www.uniprot.org/uniprot/P0AFJ3
AH-01_GM001134	86.4	1.9e-176	A6H064	Ferredoxin--NADP reductase	FP1670	Flavobacterium psychrophilum (strain JIP02/86 / ATCC 49511)	https://www.uniprot.org/uniprot/A6H064
AH-01_GM001135	42.9	1.6e-11	O32119	Putative nitrogen fixation protein YutI	yutI	Bacillus subtilis (strain 168)	https://www.uniprot.org/uniprot/O32119
AH-01_GM001136	40.9	7.9e-64	O66946	Iron-sulfur cluster carrier protein	mrp	Aquifex aeolicus (strain VF5)	https://www.uniprot.org/uniprot/O66946
AH-01_GM001137	46.2	5.4e-08	Q5SI16	DNA base-flipping protein	TTHA1564	Thermus thermophilus (strain HB8 / ATCC 27634 / DSM 579)	https://www.uniprot.org/uniprot/Q5SI16
AH-01_GM001141	71.9	3.6e-96	A0LXL4	tRNA (guanine-N(7)-)-methyltransferase	trmB	Gramella forsetii (strain KT0803)	https://www.uniprot.org/uniprot/A0LXL4
AH-01_GM001144	42.6	1.5e-43	P23545	Alkaline phosphatase synthesis sensor protein PhoR	phoR	Bacillus subtilis (strain 168)	https://www.uniprot.org/uniprot/P23545
AH-01_GM001145	40.6	1.8e-39	P35163	Transcriptional regulatory protein ResD	resD	Bacillus subtilis (strain 168)	https://www.uniprot.org/uniprot/P35163
AH-01_GM001152	59.6	1.2e-151	P49787	Biotin carboxylase 1	accC1	Bacillus subtilis (strain 168)	https://www.uniprot.org/uniprot/P49787
AH-01_GM001153	43.5	6.8e-28	P37799	Biotin carboxyl carrier protein of acetyl-CoA carboxylase	accB	Pseudomonas aeruginosa (strain ATCC 15692 / DSM 22644 / CIP 104116 / JCM 14847 / LMG 12228 / 1C / PRS 101 / PAO1)	https://www.uniprot.org/uniprot/P37799
AH-01_GM001154	58.2	1.8e-112	Q8A137	3-oxoacyl-[acyl-carrier-protein] synthase 3 protein 2	fabH2	Bacteroides thetaiotaomicron (strain ATCC 29148 / DSM 2079 / NCTC 10582 / E50 / VPI-5482)	https://www.uniprot.org/uniprot/Q8A137
AH-01_GM001155	92.2	1.4e-29	A5FM90	50S ribosomal protein L32	rpmF	Flavobacterium johnsoniae (strain ATCC 17061 / DSM 2064 / UW101)	https://www.uniprot.org/uniprot/A5FM90
AH-01_GM001157	45.9	2.3e-89	Q89ZK3	4-hydroxythreonine-4-phosphate dehydrogenase	pdxA	Bacteroides thetaiotaomicron (strain ATCC 29148 / DSM 2079 / NCTC 10582 / E50 / VPI-5482)	https://www.uniprot.org/uniprot/Q89ZK3
AH-01_GM001158	41.4	1.5e-37	P50854	Riboflavin synthase	ribE	Actinobacillus pleuropneumoniae	https://www.uniprot.org/uniprot/P50854
AH-01_GM001159	82.2	1.5e-117	A5FL19	ATP synthase gamma chain	atpG	Flavobacterium johnsoniae (strain ATCC 17061 / DSM 2064 / UW101)	https://www.uniprot.org/uniprot/A5FL19
AH-01_GM001160	92.8	9.8e-278	A6H2D7	ATP synthase subunit alpha	atpA	Flavobacterium psychrophilum (strain JIP02/86 / ATCC 49511)	https://www.uniprot.org/uniprot/A6H2D7
AH-01_GM001161	67.2	1.5e-60	A5FL33	ATP synthase subunit delta	atpH	Flavobacterium johnsoniae (strain ATCC 17061 / DSM 2064 / UW101)	https://www.uniprot.org/uniprot/A5FL33
AH-01_GM001162	72.9	6.6e-63	A5FL32	ATP synthase subunit b	atpF	Flavobacterium johnsoniae (strain ATCC 17061 / DSM 2064 / UW101)	https://www.uniprot.org/uniprot/A5FL32
AH-01_GM001163	67.9	6.4e-14	Q8A9V0	ATP synthase subunit c	atpE	Bacteroides thetaiotaomicron (strain ATCC 29148 / DSM 2079 / NCTC 10582 / E50 / VPI-5482)	https://www.uniprot.org/uniprot/Q8A9V0
AH-01_GM001164	46.4	5e-48	Q8KGE7	ATP synthase subunit a 2	atpB2	Chlorobaculum tepidum (strain ATCC 49652 / DSM 12025 / NBRC 103806 / TLS)	https://www.uniprot.org/uniprot/Q8KGE7
AH-01_GM001173	51.6	9.9e-59	B2RIV3	Uracil phosphoribosyltransferase	upp	Porphyromonas gingivalis (strain ATCC 33277 / DSM 20709 / CIP 103683 / JCM 12257 / NCTC 11834 / 2561)	https://www.uniprot.org/uniprot/B2RIV3
AH-01_GM001176	46.9	1.6e-100	Q8FB69	Phosphoribosylamine--glycine ligase	purD	Escherichia coli O6:H1 (strain CFT073 / ATCC 700928 / UPEC)	https://www.uniprot.org/uniprot/Q8FB69
AH-01_GM001179	42.9	2.4e-43	P71241	UDP-glucose:undecaprenyl-phosphate glucose-1-phosphate transferase	wcaJ	Escherichia coli (strain K12)	https://www.uniprot.org/uniprot/P71241
AH-01_GM001180	50.7	1.6e-84	Q8NBZ7	UDP-glucuronic acid decarboxylase 1	UXS1	Homo sapiens	https://www.uniprot.org/uniprot/Q8NBZ7
AH-01_GM001181	45.4	2e-59	O66251	dTDP-4-dehydrorhamnose reductase	rmlD	Aggregatibacter actinomycetemcomitans	https://www.uniprot.org/uniprot/O66251
AH-01_GM001182	54.8	5.1e-48	P37745	dTDP-4-dehydrorhamnose 3,5-epimerase	rfbC	Escherichia coli (strain K12)	https://www.uniprot.org/uniprot/P37745
AH-01_GM001188	62.5	4.1e-199	P14407	Fumarate hydratase class I, anaerobic	fumB	Escherichia coli (strain K12)	https://www.uniprot.org/uniprot/P14407
AH-01_GM001193	50.6	6.9e-85	Q7A1Q7	Uncharacterized epimerase/dehydratase MW0508	MW0508	Staphylococcus aureus (strain MW2)	https://www.uniprot.org/uniprot/Q7A1Q7
AH-01_GM001195	45.7	3.5e-168	Q55750	Transcription-repair-coupling factor	mfd	Synechocystis sp. (strain PCC 6803 / Kazusa)	https://www.uniprot.org/uniprot/Q55750
AH-01_GM001197	60.5	1.9e-35	A0M5Z7	UPF0102 protein GFO_3098	GFO_3098	Gramella forsetii (strain KT0803)	https://www.uniprot.org/uniprot/A0M5Z7
AH-01_GM001199	82.1	0	A6GVQ2	Methionine--tRNA ligase	metG	Flavobacterium psychrophilum (strain JIP02/86 / ATCC 49511)	https://www.uniprot.org/uniprot/A6GVQ2
AH-01_GM001200	44.5	1.4e-36	P43708	Probable bacterial non-heme ferritin-like protein	ftnB	Haemophilus influenzae (strain ATCC 51907 / DSM 11121 / KW20 / Rd)	https://www.uniprot.org/uniprot/P43708
AH-01_GM001219	40.1	3.4e-70	B4RRY8	Ribosomal RNA large subunit methyltransferase I	rlmI	Alteromonas mediterranea (strain DSM 17117 / CIP 110805 / LMG 28347 / Deep ecotype)	https://www.uniprot.org/uniprot/B4RRY8
AH-01_GM001221	55.6	1.9e-65	P63651	Probable succinyl-CoA:3-ketoacid coenzyme A transferase subunit B	scoB	Mycobacterium bovis (strain ATCC BAA-935 / AF2122/97)	https://www.uniprot.org/uniprot/P63651
AH-01_GM001223	62	1.9e-79	Q9ZLE3	Succinyl-CoA:3-ketoacid coenzyme A transferase subunit A	scoA	Helicobacter pylori (strain J99 / ATCC 700824)	https://www.uniprot.org/uniprot/Q9ZLE3
AH-01_GM001225	57.1	4.8e-45	Q8KRP0	Gliding motility lipoprotein GldH	gldH	Flavobacterium johnsoniae (strain ATCC 17061 / DSM 2064 / UW101)	https://www.uniprot.org/uniprot/Q8KRP0
AH-01_GM001229	52.7	1.4e-101	P59916	Collagenase	prtC	Porphyromonas gingivalis (strain ATCC BAA-308 / W83)	https://www.uniprot.org/uniprot/P59916
AH-01_GM001230	57.8	5.4e-107	A8GCZ9	UPF0176 protein Spro_1886	Spro_1886	Serratia proteamaculans (strain 568)	https://www.uniprot.org/uniprot/A8GCZ9
AH-01_GM001238	44.1	6.6e-19	P57610	Single-stranded DNA-binding protein	ssb	Buchnera aphidicola subsp. Acyrthosiphon pisum (strain APS)	https://www.uniprot.org/uniprot/P57610
AH-01_GM001244	42.4	9e-23	P49851	Uncharacterized acyl-CoA thioester hydrolase YkhA	ykhA	Bacillus subtilis (strain 168)	https://www.uniprot.org/uniprot/P49851
AH-01_GM001270	74.6	3.3e-17	A6H2G3	Sec-independent protein translocase protein TatA	tatA	Flavobacterium psychrophilum (strain JIP02/86 / ATCC 49511)	https://www.uniprot.org/uniprot/A6H2G3
AH-01_GM001272	55.8	5.7e-138	Q8A1D3	Argininosuccinate lyase	argH	Bacteroides thetaiotaomicron (strain ATCC 29148 / DSM 2079 / NCTC 10582 / E50 / VPI-5482)	https://www.uniprot.org/uniprot/Q8A1D3
AH-01_GM001274	51	4.4e-66	Q11QI8	Acetylglutamate kinase	argB	Cytophaga hutchinsonii (strain ATCC 33406 / NCIMB 9469)	https://www.uniprot.org/uniprot/Q11QI8
AH-01_GM001275	51.1	1.7e-94	Q8A1E9	N-acetylornithine carbamoyltransferase	argF'	Bacteroides thetaiotaomicron (strain ATCC 29148 / DSM 2079 / NCTC 10582 / E50 / VPI-5482)	https://www.uniprot.org/uniprot/Q8A1E9
AH-01_GM001276	40.1	9.6e-65	Q9K8V5	Acetylornithine aminotransferase	argD	Bacillus halodurans (strain ATCC BAA-125 / DSM 18197 / FERM 7344 / JCM 9153 / C-125)	https://www.uniprot.org/uniprot/Q9K8V5
AH-01_GM001277	56.7	6.3e-102	A0M376	N-acetyl-gamma-glutamyl-phosphate reductase	argC	Gramella forsetii (strain KT0803)	https://www.uniprot.org/uniprot/A0M376
AH-01_GM001286	46.3	1.5e-167	Q51062	Transcriptional accessory protein Tex	tex	Neisseria gonorrhoeae	https://www.uniprot.org/uniprot/Q51062
AH-01_GM001298	40.6	3.4e-23	Q1RJV5	Putative sugar phosphate isomerase RBE_0278	RBE_0278	Rickettsia bellii (strain RML369-C)	https://www.uniprot.org/uniprot/Q1RJV5
AH-01_GM001304	57.3	4.2e-186	Q7UX42	Glutamine--tRNA ligase	glnS	Rhodopirellula baltica (strain DSM 10527 / NCIMB 13988 / SH1)	https://www.uniprot.org/uniprot/Q7UX42
AH-01_GM001306	49.4	2.2e-62	Q9SRH6	Hypersensitive-induced response protein 3	HIR3	Arabidopsis thaliana	https://www.uniprot.org/uniprot/Q9SRH6
AH-01_GM001307	78.4	2.7e-240	A6H2H7	Glutamate--tRNA ligase	gltX	Flavobacterium psychrophilum (strain JIP02/86 / ATCC 49511)	https://www.uniprot.org/uniprot/A6H2H7
AH-01_GM001309	65.2	5.4e-50	A5FL87	Endoribonuclease YbeY	ybeY	Flavobacterium johnsoniae (strain ATCC 17061 / DSM 2064 / UW101)	https://www.uniprot.org/uniprot/A5FL87
AH-01_GM001310	81.1	5.2e-302	A6GVK0	tRNA uridine 5-carboxymethylaminomethyl modification enzyme MnmG	mnmG	Flavobacterium psychrophilum (strain JIP02/86 / ATCC 49511)	https://www.uniprot.org/uniprot/A6GVK0
AH-01_GM001321	58.8	3.1e-135	Q8A753	Phosphoglycerate kinase	pgk	Bacteroides thetaiotaomicron (strain ATCC 29148 / DSM 2079 / NCTC 10582 / E50 / VPI-5482)	https://www.uniprot.org/uniprot/Q8A753
AH-01_GM001323	44.3	6.9e-27	P0AEH3	Protein ElaA	elaA	Escherichia coli (strain K12)	https://www.uniprot.org/uniprot/P0AEH3
AH-01_GM001328	46.4	1e-56	Q1XDF1	Probable molybdopterin-synthase adenylyltransferase	moeB	Pyropia yezoensis	https://www.uniprot.org/uniprot/Q1XDF1
AH-01_GM001329	49.6	8.3e-106	Q9S498	2-iminoacetate synthase	thiH	Salmonella typhimurium (strain LT2 / SGSC1412 / ATCC 700720)	https://www.uniprot.org/uniprot/Q9S498
AH-01_GM001330	82.7	4.4e-111	A6GWS0	Thiazole synthase	thiG	Flavobacterium psychrophilum (strain JIP02/86 / ATCC 49511)	https://www.uniprot.org/uniprot/A6GWS0
AH-01_GM001331	52.4	3.5e-53	A6GWR9	Thiamine-phosphate synthase	thiE	Flavobacterium psychrophilum (strain JIP02/86 / ATCC 49511)	https://www.uniprot.org/uniprot/A6GWR9
AH-01_GM001334	75.5	7.5e-274	Q3J7C1	Phosphomethylpyrimidine synthase	thiC	Nitrosococcus oceani (strain ATCC 19707 / BCRC 17464 / NCIMB 11848 / C-107)	https://www.uniprot.org/uniprot/Q3J7C1
AH-01_GM001336	48.3	1.7e-46	P05100	DNA-3-methyladenine glycosylase 1	tag	Escherichia coli (strain K12)	https://www.uniprot.org/uniprot/P05100
AH-01_GM001338	75.6	1.4e-95	Q9RB36	tRNA pseudouridine synthase B	truB	Flavobacterium johnsoniae (strain ATCC 17061 / DSM 2064 / UW101)	https://www.uniprot.org/uniprot/Q9RB36
AH-01_GM001339	55.9	6.7e-73	A6H239	Undecaprenyl-diphosphatase	uppP	Flavobacterium psychrophilum (strain JIP02/86 / ATCC 49511)	https://www.uniprot.org/uniprot/A6H239
AH-01_GM001341	68.4	7.9e-112	A5FMG4	Cell division protein FtsX	ftsX	Flavobacterium johnsoniae (strain ATCC 17061 / DSM 2064 / UW101)	https://www.uniprot.org/uniprot/A5FMG4
AH-01_GM001344	77.2	0	A5FMG2	Leucine--tRNA ligase	leuS	Flavobacterium johnsoniae (strain ATCC 17061 / DSM 2064 / UW101)	https://www.uniprot.org/uniprot/A5FMG2
AH-01_GM001349	66.4	1.1e-81	A6H233	Leucyl/phenylalanyl-tRNA--protein transferase	aat	Flavobacterium psychrophilum (strain JIP02/86 / ATCC 49511)	https://www.uniprot.org/uniprot/A6H233
AH-01_GM001354	50	1.4e-56	Q3V7R3	Biosynthetic peptidoglycan transglycosylase	mtgA	Bdellovibrio bacteriovorus (strain ATCC 15356 / DSM 50701 / NCIB 9529 / HD100)	https://www.uniprot.org/uniprot/Q3V7R3
AH-01_GM001360	75	3e-237	Q7MU78	Phosphoenolpyruvate carboxykinase (ATP)	pckA	Porphyromonas gingivalis (strain ATCC BAA-308 / W83)	https://www.uniprot.org/uniprot/Q7MU78
AH-01_GM001361	40.8	1.4e-61	Q92JQ6	Probable tRNA-dihydrouridine synthase	dus	Rickettsia conorii (strain ATCC VR-613 / Malish 7)	https://www.uniprot.org/uniprot/Q92JQ6
AH-01_GM001364	93.3	0	A5FLU8	Elongation factor 4	lepA	Flavobacterium johnsoniae (strain ATCC 17061 / DSM 2064 / UW101)	https://www.uniprot.org/uniprot/A5FLU8
AH-01_GM001365	47.6	2.8e-122	O07576	Uncharacterized amino acid permease YhdG	yhdG	Bacillus subtilis (strain 168)	https://www.uniprot.org/uniprot/O07576
AH-01_GM001367	80.6	5.5e-285	A6GW65	UvrABC system protein C	uvrC	Flavobacterium psychrophilum (strain JIP02/86 / ATCC 49511)	https://www.uniprot.org/uniprot/A6GW65
AH-01_GM001369	65.5	4.4e-77	P28760	Superoxide dismutase [Mn]	sodA	Bacillus caldotenax	https://www.uniprot.org/uniprot/P28760
AH-01_GM001371	62.5	2.5e-140	P0AB78	2-amino-3-ketobutyrate coenzyme A ligase	kbl	Escherichia coli O157:H7	https://www.uniprot.org/uniprot/P0AB78
AH-01_GM001388	40.7	2e-50	P0DP67	Omega-amidase YafV	yafV	Yersinia enterocolitica	https://www.uniprot.org/uniprot/P0DP67
AH-01_GM001402	59.8	3e-140	Q89K67	Divalent metal cation transporter MntH	mntH	Bradyrhizobium diazoefficiens (strain JCM 10833 / IAM 13628 / NBRC 14792 / USDA 110)	https://www.uniprot.org/uniprot/Q89K67
AH-01_GM001443	53.1	5.3e-143	Q8KAB1	Glycine--tRNA ligase	glyQS	Chlorobaculum tepidum (strain ATCC 49652 / DSM 12025 / NBRC 103806 / TLS)	https://www.uniprot.org/uniprot/Q8KAB1
AH-01_GM001450	40.4	4.7e-26	Q8TI34	Methylated-DNA--protein-cysteine methyltransferase	ogt	Methanosarcina acetivorans (strain ATCC 35395 / DSM 2834 / JCM 12185 / C2A)	https://www.uniprot.org/uniprot/Q8TI34
AH-01_GM001452	56	7.2e-101	Q8KCJ0	Delta-aminolevulinic acid dehydratase	hemB	Chlorobaculum tepidum (strain ATCC 49652 / DSM 12025 / NBRC 103806 / TLS)	https://www.uniprot.org/uniprot/Q8KCJ0
AH-01_GM001454	52.9	6.1e-91	P35055	Oxygen-dependent coproporphyrinogen-III oxidase, chloroplastic	CPX	Glycine max	https://www.uniprot.org/uniprot/P35055
AH-01_GM001456	85.5	2.1e-172	A5FLE7	Uroporphyrinogen decarboxylase	hemE	Flavobacterium johnsoniae (strain ATCC 17061 / DSM 2064 / UW101)	https://www.uniprot.org/uniprot/A5FLE7
AH-01_GM001458	40.9	7.8e-52	Q6H6D2	Porphobilinogen deaminase, chloroplastic	HEMC	Oryza sativa subsp. japonica	https://www.uniprot.org/uniprot/Q6H6D2
AH-01_GM001459	77.5	3.2e-181	A6GVP1	Glutamyl-tRNA reductase	hemA	Flavobacterium psychrophilum (strain JIP02/86 / ATCC 49511)	https://www.uniprot.org/uniprot/A6GVP1
AH-01_GM001461	48.8	1.4e-83	Q888A2	Ferrochelatase	hemH	Pseudomonas syringae pv. tomato (strain ATCC BAA-871 / DC3000)	https://www.uniprot.org/uniprot/Q888A2
AH-01_GM001462	40	2.1e-30	P72793	UPF0093 membrane protein slr1790	slr1790	Synechocystis sp. (strain PCC 6803 / Kazusa)	https://www.uniprot.org/uniprot/P72793
AH-01_GM001464	49.4	5.1e-62	P52046	Short-chain-enoyl-CoA hydratase	crt	Clostridium acetobutylicum (strain ATCC 824 / DSM 792 / JCM 1419 / LMG 5710 / VKM B-1787)	https://www.uniprot.org/uniprot/P52046
AH-01_GM001470	40.5	1.3e-72	P02982	Tetracycline resistance protein, class A	tetA	Escherichia coli	https://www.uniprot.org/uniprot/P02982
AH-01_GM001472	44.6	5.5e-95	P52993	Dihydrolipoyllysine-residue succinyltransferase component of 2-oxoglutarate dehydrogenase complex	sucB	Cupriavidus necator (strain ATCC 17699 / H16 / DSM 428 / Stanier 337)	https://www.uniprot.org/uniprot/P52993
AH-01_GM001473	42.5	2.6e-209	Q59106	2-oxoglutarate dehydrogenase E1 component	odhA	Cupriavidus necator (strain ATCC 17699 / H16 / DSM 428 / Stanier 337)	https://www.uniprot.org/uniprot/Q59106
AH-01_GM001486	50.6	4.1e-88	P22337	Stearoyl-[acyl-carrier-protein] 9-desaturase, chloroplastic	1 SV	Ricinus communis	https://www.uniprot.org/uniprot/P22337
AH-01_GM001489	58.2	3.5e-38	Q11WG7	UPF0403 protein CHU_0972	CHU_0972	Cytophaga hutchinsonii (strain ATCC 33406 / NCIMB 9469)	https://www.uniprot.org/uniprot/Q11WG7
AH-01_GM001494	75	1.4e-56	A5FL22	Deoxyuridine 5'-triphosphate nucleotidohydrolase	dut	Flavobacterium johnsoniae (strain ATCC 17061 / DSM 2064 / UW101)	https://www.uniprot.org/uniprot/A5FL22
AH-01_GM001497	48.7	1.4e-112	Q2S1G4	Serine--tRNA ligase	serS	Salinibacter ruber (strain DSM 13855 / M31)	https://www.uniprot.org/uniprot/Q2S1G4
AH-01_GM001501	78	1.1e-112	A5FLP4	Ribosomal RNA small subunit methyltransferase A	rsmA	Flavobacterium johnsoniae (strain ATCC 17061 / DSM 2064 / UW101)	https://www.uniprot.org/uniprot/A5FLP4
AH-01_GM001515	46.9	3.5e-76	Q8RGA3	Tryptophan--tRNA ligase	trpS	Fusobacterium nucleatum subsp. nucleatum (strain ATCC 25586 / CIP 101130 / JCM 8532 / LMG 13131)	https://www.uniprot.org/uniprot/Q8RGA3
AH-01_GM001518	63	1.1e-204	A0M665	Glucose-6-phosphate isomerase	pgi	Gramella forsetii (strain KT0803)	https://www.uniprot.org/uniprot/A0M665
AH-01_GM001523	48.7	4.6e-85	Q00512	Type II secretion system protein E	xcpR	Pseudomonas aeruginosa (strain ATCC 15692 / DSM 22644 / CIP 104116 / JCM 14847 / LMG 12228 / 1C / PRS 101 / PAO1)	https://www.uniprot.org/uniprot/Q00512
AH-01_GM001531	40.9	8.4e-06	P00259	Putidaredoxin	camB	Pseudomonas putida	https://www.uniprot.org/uniprot/P00259
AH-01_GM001535	51.8	2.7e-107	Q2KHZ9	Glutaryl-CoA dehydrogenase, mitochondrial	GCDH	Bos taurus	https://www.uniprot.org/uniprot/Q2KHZ9
AH-01_GM001551	83.8	1e-55	A5FL10	Ribosome-binding factor A	rbfA	Flavobacterium johnsoniae (strain ATCC 17061 / DSM 2064 / UW101)	https://www.uniprot.org/uniprot/A5FL10
AH-01_GM001552	53.4	1.9e-31	O58010	Methylmalonyl-CoA epimerase	PH0272	Pyrococcus horikoshii (strain ATCC 700860 / DSM 12428 / JCM 9974 / NBRC 100139 / OT-3)	https://www.uniprot.org/uniprot/O58010
AH-01_GM001556	65.5	1.3e-82	Q87MQ5	Aquaporin Z	aqpZ	Vibrio parahaemolyticus serotype O3:K6 (strain RIMD 2210633)	https://www.uniprot.org/uniprot/Q87MQ5
AH-01_GM001558	88.9	5.4e-187	A6GW77	Biotin synthase	bioB	Flavobacterium psychrophilum (strain JIP02/86 / ATCC 49511)	https://www.uniprot.org/uniprot/A6GW77
AH-01_GM001560	74.9	3.8e-142	Q59717	Protein RecA	recA	Prevotella ruminicola (strain ATCC 19189 / JCM 8958 / 23)	https://www.uniprot.org/uniprot/Q59717
AH-01_GM001561	42.1	3.9e-18	P0A5B6	Uncharacterized HIT-like protein Mb0782c	BQ2027_MB0782C	Mycobacterium bovis (strain ATCC BAA-935 / AF2122/97)	https://www.uniprot.org/uniprot/P0A5B6
AH-01_GM001562	86.7	5.7e-70	A5FJJ8	Transcription elongation factor GreA	greA	Flavobacterium johnsoniae (strain ATCC 17061 / DSM 2064 / UW101)	https://www.uniprot.org/uniprot/A5FJJ8
AH-01_GM001564	41	2.5e-81	Q97Y16	Putative dioxygenase SSO1533	SSO1533	Sulfolobus solfataricus (strain ATCC 35092 / DSM 1617 / JCM 11322 / P2)	https://www.uniprot.org/uniprot/Q97Y16
AH-01_GM001565	49.2	7.3e-97	Q6CDR5	4-hydroxyphenylpyruvate dioxygenase	YALI0B21846g	Yarrowia lipolytica (strain CLIB 122 / E 150)	https://www.uniprot.org/uniprot/Q6CDR5
AH-01_GM001566	66.4	1.4e-90	A5FKD7	tRNA1(Val) (adenine(37)-N6)-methyltransferase	Fjoh_1299	Flavobacterium johnsoniae (strain ATCC 17061 / DSM 2064 / UW101)	https://www.uniprot.org/uniprot/A5FKD7
AH-01_GM001567	67.8	4e-66	A6GWI5	Ribosome maturation factor RimM	rimM	Flavobacterium psychrophilum (strain JIP02/86 / ATCC 49511)	https://www.uniprot.org/uniprot/A6GWI5
AH-01_GM001568	73	3.4e-70	A5FKD9	30S ribosomal protein S16	rpsP	Flavobacterium johnsoniae (strain ATCC 17061 / DSM 2064 / UW101)	https://www.uniprot.org/uniprot/A5FKD9
AH-01_GM001571	54.5	3.3e-28	P0A4L1	Thioredoxin 1	trxA	Nostoc sp. (strain PCC 7120 / SAG 25.82 / UTEX 2576)	https://www.uniprot.org/uniprot/P0A4L1
AH-01_GM001574	85.3	4.8e-294	A5FKJ2	Aspartate--tRNA ligase	aspS	Flavobacterium johnsoniae (strain ATCC 17061 / DSM 2064 / UW101)	https://www.uniprot.org/uniprot/A5FKJ2
AH-01_GM001578	58.5	2.1e-12	Q9S170	Cold shock-like protein CspG	cspG	Shewanella violacea (strain JCM 10179 / CIP 106290 / LMG 19151 / DSS12)	https://www.uniprot.org/uniprot/Q9S170
AH-01_GM001579	47.3	2.2e-29	Q99W51	tRNA-specific adenosine deaminase	tadA	Staphylococcus aureus (strain Mu50 / ATCC 700699)	https://www.uniprot.org/uniprot/Q99W51
AH-01_GM001580	52.4	3.7e-180	B6YRV5	1-deoxy-D-xylulose-5-phosphate synthase	dxs	Azobacteroides pseudotrichonymphae genomovar. CFP2	https://www.uniprot.org/uniprot/B6YRV5
AH-01_GM001582	41.3	9.4e-80	Q55731	Deoxyguanosinetriphosphate triphosphohydrolase-like protein	sll0398	Synechocystis sp. (strain PCC 6803 / Kazusa)	https://www.uniprot.org/uniprot/Q55731
AH-01_GM001584	63.8	1.7e-310	P07742	Ribonucleoside-diphosphate reductase large subunit	Rrm1	Mus musculus	https://www.uniprot.org/uniprot/P07742
AH-01_GM001585	68.1	3.3e-127	Q9C167	Ribonucleoside-diphosphate reductase small chain	rnr-2	Neurospora crassa (strain ATCC 24698 / 74-OR23-1A / CBS 708.71 / DSM 1257 / FGSC 987)	https://www.uniprot.org/uniprot/Q9C167
AH-01_GM001590	40.8	5.8e-15	P32393	ComE operon protein 2	comEB	Bacillus subtilis (strain 168)	https://www.uniprot.org/uniprot/P32393
AH-01_GM001593	71.4	2.4e-59	A6GWV6	Ribosome maturation factor RimP	rimP	Flavobacterium psychrophilum (strain JIP02/86 / ATCC 49511)	https://www.uniprot.org/uniprot/A6GWV6
AH-01_GM001595	73.9	0	A6GWV8	Translation initiation factor IF-2	infB	Flavobacterium psychrophilum (strain JIP02/86 / ATCC 49511)	https://www.uniprot.org/uniprot/A6GWV8
AH-01_GM001598	86.2	2e-167	A6H1G3	Holliday junction ATP-dependent DNA helicase RuvB	ruvB	Flavobacterium psychrophilum (strain JIP02/86 / ATCC 49511)	https://www.uniprot.org/uniprot/A6H1G3
AH-01_GM001599	79.9	4.6e-150	A6H1G2	Epoxyqueuosine reductase	queG	Flavobacterium psychrophilum (strain JIP02/86 / ATCC 49511)	https://www.uniprot.org/uniprot/A6H1G2
AH-01_GM001600	49.5	4.7e-196	Q9ZFV8	NADP-dependent malic enzyme	maeB	Salmonella typhimurium (strain LT2 / SGSC1412 / ATCC 700720)	https://www.uniprot.org/uniprot/Q9ZFV8
AH-01_GM001601	80.8	3.9e-83	A6H1G0	Holliday junction ATP-dependent DNA helicase RuvA	ruvA	Flavobacterium psychrophilum (strain JIP02/86 / ATCC 49511)	https://www.uniprot.org/uniprot/A6H1G0
AH-01_GM001603	73	3.4e-51	A0LXS6	Glycine cleavage system H protein	gcvH	Gramella forsetii (strain KT0803)	https://www.uniprot.org/uniprot/A0LXS6
AH-01_GM001613	57.8	1.2e-97	Q7MT83	Ribose-phosphate pyrophosphokinase	prs	Porphyromonas gingivalis (strain ATCC BAA-308 / W83)	https://www.uniprot.org/uniprot/Q7MT83
AH-01_GM001614	80.2	1.8e-91	A6GVZ1	50S ribosomal protein L25	rplY	Flavobacterium psychrophilum (strain JIP02/86 / ATCC 49511)	https://www.uniprot.org/uniprot/A6GVZ1
AH-01_GM001615	56.5	1.8e-56	B2RHF2	Peptidyl-tRNA hydrolase	pth	Porphyromonas gingivalis (strain ATCC 33277 / DSM 20709 / CIP 103683 / JCM 12257 / NCTC 11834 / 2561)	https://www.uniprot.org/uniprot/B2RHF2
AH-01_GM001620	82	8.3e-83	A0LXG7	Crossover junction endodeoxyribonuclease RuvC	ruvC	Gramella forsetii (strain KT0803)	https://www.uniprot.org/uniprot/A0LXG7
AH-01_GM001626	75.3	5e-130	A6H1E4	Protoheme IX farnesyltransferase	ctaB	Flavobacterium psychrophilum (strain JIP02/86 / ATCC 49511)	https://www.uniprot.org/uniprot/A6H1E4
AH-01_GM001632	46.6	5.7e-36	O31845	Uncharacterized membrane protein YozB	yozB	Bacillus subtilis (strain 168)	https://www.uniprot.org/uniprot/O31845
AH-01_GM001641	40.6	3e-34	Q9C6B3	Gamma carbonic anhydrase 2, mitochondrial	GAMMACA2	Arabidopsis thaliana	https://www.uniprot.org/uniprot/Q9C6B3
AH-01_GM001642	41.2	2e-53	A4XR64	Glutamate racemase	murI	Pseudomonas mendocina (strain ymp)	https://www.uniprot.org/uniprot/A4XR64
AH-01_GM001646	54.5	4.9e-70	Q8KFQ5	Isoprenyl transferase	uppS	Chlorobaculum tepidum (strain ATCC 49652 / DSM 12025 / NBRC 103806 / TLS)	https://www.uniprot.org/uniprot/Q8KFQ5
AH-01_GM001648	73.5	4.2e-121	A6H1D1	NAD kinase	nadK	Flavobacterium psychrophilum (strain JIP02/86 / ATCC 49511)	https://www.uniprot.org/uniprot/A6H1D1
AH-01_GM001650	82.4	2.3e-106	A5FJ95	Pyridoxine 5'-phosphate synthase	pdxJ	Flavobacterium johnsoniae (strain ATCC 17061 / DSM 2064 / UW101)	https://www.uniprot.org/uniprot/A5FJ95
AH-01_GM001654	72.7	1.2e-85	Q8A129	ATP-dependent Clp protease proteolytic subunit	clpP	Bacteroides thetaiotaomicron (strain ATCC 29148 / DSM 2079 / NCTC 10582 / E50 / VPI-5482)	https://www.uniprot.org/uniprot/Q8A129
AH-01_GM001655	64.7	4.8e-147	Q5L8L7	ATP-dependent Clp protease ATP-binding subunit ClpX	clpX	Bacteroides fragilis (strain ATCC 25285 / DSM 2151 / JCM 11019 / NCTC 9343)	https://www.uniprot.org/uniprot/Q5L8L7
AH-01_GM001663	85.9	0	A6GWN3	DNA mismatch repair protein MutS	mutS	Flavobacterium psychrophilum (strain JIP02/86 / ATCC 49511)	https://www.uniprot.org/uniprot/A6GWN3
AH-01_GM001664	90	2e-175	A6GWD9	Fructose-1,6-bisphosphatase class 1	fbp	Flavobacterium psychrophilum (strain JIP02/86 / ATCC 49511)	https://www.uniprot.org/uniprot/A6GWD9
AH-01_GM001666	40.7	7.6e-24	Q96F10	Diamine acetyltransferase 2	SAT2	Homo sapiens	https://www.uniprot.org/uniprot/Q96F10
AH-01_GM001684	64.6	6.1e-81	A6H2B4	Type III pantothenate kinase	coaX	Flavobacterium psychrophilum (strain JIP02/86 / ATCC 49511)	https://www.uniprot.org/uniprot/A6H2B4
AH-01_GM001702	72.3	1.2e-106	A6H213	5'-nucleotidase SurE	surE	Flavobacterium psychrophilum (strain JIP02/86 / ATCC 49511)	https://www.uniprot.org/uniprot/A6H213
AH-01_GM001720	47.4	3.5e-82	P39751	MreB-like protein	mbl	Bacillus subtilis (strain 168)	https://www.uniprot.org/uniprot/P39751
AH-01_GM001725	62.7	5.3e-180	Q8A155	Bifunctional purine biosynthesis protein PurH	purH	Bacteroides thetaiotaomicron (strain ATCC 29148 / DSM 2079 / NCTC 10582 / E50 / VPI-5482)	https://www.uniprot.org/uniprot/Q8A155
AH-01_GM001727	89.1	1.1e-147	A6GWG2	Acetyl-coenzyme A carboxylase carboxyl transferase subunit beta	accD	Flavobacterium psychrophilum (strain JIP02/86 / ATCC 49511)	https://www.uniprot.org/uniprot/A6GWG2
AH-01_GM001728	68.9	1.3e-140	O52402	Fructose-bisphosphate aldolase	fba	Edwardsiella ictaluri (strain 93-146)	https://www.uniprot.org/uniprot/O52402
AH-01_GM001732	49.6	3.9e-64	Q8A005	Demethylmenaquinone methyltransferase	menG	Bacteroides thetaiotaomicron (strain ATCC 29148 / DSM 2079 / NCTC 10582 / E50 / VPI-5482)	https://www.uniprot.org/uniprot/Q8A005
AH-01_GM001746	61.8	1.6e-54	Q8PWY5	Inorganic pyrophosphatase	ppa	Methanosarcina mazei (strain ATCC BAA-159 / DSM 3647 / Goe1 / Go1 / JCM 11833 / OCM 88)	https://www.uniprot.org/uniprot/Q8PWY5
AH-01_GM001750	56.6	1.1e-98	Q9R9N4	Pyruvate dehydrogenase E1 component subunit beta	pdhB	Rhizobium meliloti (strain 1021)	https://www.uniprot.org/uniprot/Q9R9N4
AH-01_GM001754	83.7	1.4e-139	A5FJV8	Thymidylate synthase	thyA	Flavobacterium johnsoniae (strain ATCC 17061 / DSM 2064 / UW101)	https://www.uniprot.org/uniprot/A5FJV8
AH-01_GM001755	41.9	3.3e-30	P11045	Dihydrofolate reductase	dfrA	Bacillus subtilis (strain 168)	https://www.uniprot.org/uniprot/P11045
AH-01_GM001758	40.8	8.2e-39	P37529	Deoxyadenosine/deoxycytidine kinase	dck	Bacillus subtilis (strain 168)	https://www.uniprot.org/uniprot/P37529
AH-01_GM001761	83.3	1.7e-200	A5FJU1	S-adenosylmethionine synthase	metK	Flavobacterium johnsoniae (strain ATCC 17061 / DSM 2064 / UW101)	https://www.uniprot.org/uniprot/A5FJU1
AH-01_GM001769	54.7	4.3e-58	P56891	Phosphoadenosine phosphosulfate reductase	cysH	Rhizobium meliloti (strain 1021)	https://www.uniprot.org/uniprot/P56891
AH-01_GM001770	56.4	2.9e-101	A4T8Q2	Sulfate adenylyltransferase subunit 2	cysD	Mycobacterium gilvum (strain PYR-GCK)	https://www.uniprot.org/uniprot/A4T8Q2
AH-01_GM001771	48.2	8.9e-101	C5BSJ5	Sulfate adenylyltransferase subunit 1	cysN	Teredinibacter turnerae (strain ATCC 39867 / T7901)	https://www.uniprot.org/uniprot/C5BSJ5
AH-01_GM001772	44.8	2.5e-43	Q59967	Serine acetyltransferase, plasmid	srpH	Synechococcus elongatus (strain PCC 7942)	https://www.uniprot.org/uniprot/Q59967
AH-01_GM001773	76	4.5e-110	Q59447	Cysteine synthase	cysK	Flavobacterium sp. (strain K3-15 / DSM ID92-509)	https://www.uniprot.org/uniprot/Q59447
AH-01_GM001774	43	3e-52	Q21K21	Siroheme synthase	cysG	Saccharophagus degradans (strain 2-40 / ATCC 43961 / DSM 17024)	https://www.uniprot.org/uniprot/Q21K21
AH-01_GM001775	44.3	2.1e-57	A7MJ63	Sulfite reductase [NADPH] flavoprotein alpha-component	cysJ	Cronobacter sakazakii (strain ATCC BAA-894)	https://www.uniprot.org/uniprot/A7MJ63
AH-01_GM001776	57.6	2e-180	B0SF75	Sulfite reductase [NADPH] hemoprotein beta-component	cysI	Leptospira biflexa serovar Patoc (strain Patoc 1 / Ames)	https://www.uniprot.org/uniprot/B0SF75
AH-01_GM001779	42.7	1.2e-40	O34430	Probable membrane transporter protein YtnM	ytnM	Bacillus subtilis (strain 168)	https://www.uniprot.org/uniprot/O34430
AH-01_GM001781	40.9	5.7e-51	Q5B998	Homoserine dehydrogenase	AN2882	Emericella nidulans (strain FGSC A4 / ATCC 38163 / CBS 112.46 / NRRL 194 / M139)	https://www.uniprot.org/uniprot/Q5B998
AH-01_GM001782	62.9	2.4e-270	P37586	Methionine synthase	metH	Salmonella typhimurium (strain LT2 / SGSC1412 / ATCC 700720)	https://www.uniprot.org/uniprot/P37586
AH-01_GM001792	40.5	1e-28	Q6L0D1	NH(3)-dependent NAD(+) synthetase	nadE	Picrophilus torridus (strain ATCC 700027 / DSM 9790 / JCM 10055 / NBRC 100828)	https://www.uniprot.org/uniprot/Q6L0D1
AH-01_GM001796	85.2	4.6e-98	A6H1A5	Probable GTP-binding protein EngB	engB	Flavobacterium psychrophilum (strain JIP02/86 / ATCC 49511)	https://www.uniprot.org/uniprot/A6H1A5
AH-01_GM001799	86.1	3.3e-215	A6H0U4	Adenylosuccinate synthetase	purA	Flavobacterium psychrophilum (strain JIP02/86 / ATCC 49511)	https://www.uniprot.org/uniprot/A6H0U4
AH-01_GM001801	80.6	4.9e-59	A6H1A3	Transcriptional regulator MraZ	mraZ	Flavobacterium psychrophilum (strain JIP02/86 / ATCC 49511)	https://www.uniprot.org/uniprot/A6H1A3
AH-01_GM001802	79.4	6.4e-133	A6H1A2	Ribosomal RNA small subunit methyltransferase H	rsmH	Flavobacterium psychrophilum (strain JIP02/86 / ATCC 49511)	https://www.uniprot.org/uniprot/A6H1A2
AH-01_GM001805	54.6	2.4e-153	Q11RG9	UDP-N-acetylmuramoyl-L-alanyl-D-glutamate--2,6-diaminopimelate ligase	murE	Cytophaga hutchinsonii (strain ATCC 33406 / NCIMB 9469)	https://www.uniprot.org/uniprot/Q11RG9
AH-01_GM001806	82.4	1e-197	A6H198	Phospho-N-acetylmuramoyl-pentapeptide-transferase	mraY	Flavobacterium psychrophilum (strain JIP02/86 / ATCC 49511)	https://www.uniprot.org/uniprot/A6H198
AH-01_GM001807	68.1	2.8e-177	A0M529	UDP-N-acetylmuramoylalanine--D-glutamate ligase	murD	Gramella forsetii (strain KT0803)	https://www.uniprot.org/uniprot/A0M529
AH-01_GM001809	78.8	1.8e-161	A6H195	UDP-N-acetylglucosamine--N-acetylmuramyl-(pentapeptide) pyrophosphoryl-undecaprenol N-acetylglucosamine transferase	murG	Flavobacterium psychrophilum (strain JIP02/86 / ATCC 49511)	https://www.uniprot.org/uniprot/A6H195
AH-01_GM001810	80	3.7e-209	A6H194	UDP-N-acetylmuramate--L-alanine ligase	murC	Flavobacterium psychrophilum (strain JIP02/86 / ATCC 49511)	https://www.uniprot.org/uniprot/A6H194
AH-01_GM001813	50.8	3.9e-77	O08466	Cell division protein FtsZ	ftsZ	Porphyromonas gingivalis (strain ATCC BAA-308 / W83)	https://www.uniprot.org/uniprot/O08466
AH-01_GM001815	91.2	1.6e-275	A5FIV1	60 kDa chaperonin	groL	Flavobacterium johnsoniae (strain ATCC 17061 / DSM 2064 / UW101)	https://www.uniprot.org/uniprot/A5FIV1
AH-01_GM001816	67.4	1.5e-29	B2RKS5	10 kDa chaperonin	groS	Porphyromonas gingivalis (strain ATCC 33277 / DSM 20709 / CIP 103683 / JCM 12257 / NCTC 11834 / 2561)	https://www.uniprot.org/uniprot/B2RKS5
AH-01_GM001821	48.7	1.5e-58	Q845S7	Sigma54-dependent transcriptional activator SfnR	sfnR	Pseudomonas putida	https://www.uniprot.org/uniprot/Q845S7
AH-01_GM001823	77.7	7.2e-219	A6H119	tRNA-2-methylthio-N(6)-dimethylallyladenosine synthase	miaB	Flavobacterium psychrophilum (strain JIP02/86 / ATCC 49511)	https://www.uniprot.org/uniprot/A6H119
AH-01_GM001824	42.2	2.8e-162	Q87AQ6	DNA topoisomerase 1	topA	Xylella fastidiosa (strain Temecula1 / ATCC 700964)	https://www.uniprot.org/uniprot/Q87AQ6
AH-01_GM001844	52	1.1e-113	P43885	D-3-phosphoglycerate dehydrogenase	serA	Haemophilus influenzae (strain ATCC 51907 / DSM 11121 / KW20 / Rd)	https://www.uniprot.org/uniprot/P43885
AH-01_GM001846	52.8	6.8e-108	Q98A07	Histidine decarboxylase	hdc	Mesorhizobium japonicum (strain LMG 29417 / CECT 9101 / MAFF 303099)	https://www.uniprot.org/uniprot/Q98A07
AH-01_GM001856	82.7	0	A5FMT0	Glycine dehydrogenase (decarboxylating)	gcvP	Flavobacterium johnsoniae (strain ATCC 17061 / DSM 2064 / UW101)	https://www.uniprot.org/uniprot/A5FMT0
AH-01_GM001871	60.4	1.2e-48	Q9WYS7	N5-carboxyaminoimidazole ribonucleotide mutase	purE	Thermotoga maritima (strain ATCC 43589 / MSB8 / DSM 3109 / JCM 10099)	https://www.uniprot.org/uniprot/Q9WYS7
AH-01_GM001874	40.4	2.7e-59	P55195	Phosphoribosylaminoimidazole carboxylase, chloroplastic (Fragment)	PURKE	Vigna aconitifolia	https://www.uniprot.org/uniprot/P55195
AH-01_GM001875	45.8	2.4e-31	P0DD40	Hypoxanthine-guanine phosphoribosyltransferase	hpt	Streptococcus pyogenes serotype M3 (strain ATCC BAA-595 / MGAS315)	https://www.uniprot.org/uniprot/P0DD40
AH-01_GM001876	83.2	4.9e-86	A6GZB9	Adenylate kinase	adk	Flavobacterium psychrophilum (strain JIP02/86 / ATCC 49511)	https://www.uniprot.org/uniprot/A6GZB9
AH-01_GM001877	42.2	1.2e-89	P74409	UPF0053 protein sll0260	sll0260	Synechocystis sp. (strain PCC 6803 / Kazusa)	https://www.uniprot.org/uniprot/P74409
AH-01_GM001878	84.3	5.1e-171	A6GZB7	GTPase Obg	obg	Flavobacterium psychrophilum (strain JIP02/86 / ATCC 49511)	https://www.uniprot.org/uniprot/A6GZB7
AH-01_GM001887	60.4	2e-257	C2M262	Dipeptidyl-peptidase 7	dpp7	Capnocytophaga gingivalis	https://www.uniprot.org/uniprot/C2M262
AH-01_GM001895	50.9	3.4e-122	Q44740	Alcaligin biosynthesis enzyme	alcA	Bordetella bronchiseptica (strain ATCC BAA-588 / NCTC 13252 / RB50)	https://www.uniprot.org/uniprot/Q44740
AH-01_GM001902	67.6	2.4e-79	A5FMW5	UPF0758 protein Fjoh_0413	Fjoh_0413	Flavobacterium johnsoniae (strain ATCC 17061 / DSM 2064 / UW101)	https://www.uniprot.org/uniprot/A5FMW5
AH-01_GM001903	40.2	2.4e-30	Q5ZT78	Lipoprotein-releasing system ATP-binding protein LolD	lolD	Legionella pneumophila subsp. pneumophila (strain Philadelphia 1 / ATCC 33152 / DSM 7513)	https://www.uniprot.org/uniprot/Q5ZT78
AH-01_GM001910	43.2	1.4e-93	P39918	Replication-associated recombination protein A	rarA	Coxiella burnetii (strain RSA 493 / Nine Mile phase I)	https://www.uniprot.org/uniprot/P39918
AH-01_GM001916	92.9	1.5e-62	A5FMY5	30S ribosomal protein S12	rpsL	Flavobacterium johnsoniae (strain ATCC 17061 / DSM 2064 / UW101)	https://www.uniprot.org/uniprot/A5FMY5
AH-01_GM001917	92.4	3.7e-79	A5FMY4	30S ribosomal protein S7	rpsG	Flavobacterium johnsoniae (strain ATCC 17061 / DSM 2064 / UW101)	https://www.uniprot.org/uniprot/A5FMY4
AH-01_GM001918	74.7	0	A0M5A0	Elongation factor G	fusA	Gramella forsetii (strain KT0803)	https://www.uniprot.org/uniprot/A0M5A0
AH-01_GM001919	97	1.4e-47	A0M599	30S ribosomal protein S10	rpsJ	Gramella forsetii (strain KT0803)	https://www.uniprot.org/uniprot/A0M599
AH-01_GM001920	91.2	9.5e-105	A5FMY1	50S ribosomal protein L3	rplC	Flavobacterium johnsoniae (strain ATCC 17061 / DSM 2064 / UW101)	https://www.uniprot.org/uniprot/A5FMY1
AH-01_GM001921	89	6.5e-100	A5FMY0	50S ribosomal protein L4	rplD	Flavobacterium johnsoniae (strain ATCC 17061 / DSM 2064 / UW101)	https://www.uniprot.org/uniprot/A5FMY0
AH-01_GM001922	45.6	1.7e-15	B3QY26	50S ribosomal protein L23	rplW	Chloroherpeton thalassium (strain ATCC 35110 / GB-78)	https://www.uniprot.org/uniprot/B3QY26
AH-01_GM001923	93.4	3.5e-146	A6GZ96	50S ribosomal protein L2	rplB	Flavobacterium psychrophilum (strain JIP02/86 / ATCC 49511)	https://www.uniprot.org/uniprot/A6GZ96
AH-01_GM001924	93.5	2.2e-44	A6GZ95	30S ribosomal protein S19	rpsS	Flavobacterium psychrophilum (strain JIP02/86 / ATCC 49511)	https://www.uniprot.org/uniprot/A6GZ95
AH-01_GM001925	94.1	1.4e-66	A5FMZ5	50S ribosomal protein L22	rplV	Flavobacterium johnsoniae (strain ATCC 17061 / DSM 2064 / UW101)	https://www.uniprot.org/uniprot/A5FMZ5
AH-01_GM001926	90.5	1.8e-125	A6GZ93	30S ribosomal protein S3	rpsC	Flavobacterium psychrophilum (strain JIP02/86 / ATCC 49511)	https://www.uniprot.org/uniprot/A6GZ93
AH-01_GM001927	97.2	7.8e-73	A5FMZ3	50S ribosomal protein L16	rplP	Flavobacterium johnsoniae (strain ATCC 17061 / DSM 2064 / UW101)	https://www.uniprot.org/uniprot/A5FMZ3
AH-01_GM001928	88.7	4.3e-23	A6GZ91	50S ribosomal protein L29	rpmC	Flavobacterium psychrophilum (strain JIP02/86 / ATCC 49511)	https://www.uniprot.org/uniprot/A6GZ91
AH-01_GM001929	80	2.4e-32	Q8A485	30S ribosomal protein S17 1	rpsQ1	Bacteroides thetaiotaomicron (strain ATCC 29148 / DSM 2079 / NCTC 10582 / E50 / VPI-5482)	https://www.uniprot.org/uniprot/Q8A485
AH-01_GM001930	99.2	7.8e-61	A5FMZ0	50S ribosomal protein L14	rplN	Flavobacterium johnsoniae (strain ATCC 17061 / DSM 2064 / UW101)	https://www.uniprot.org/uniprot/A5FMZ0
AH-01_GM001931	79.6	2.4e-39	A5FMY9	50S ribosomal protein L24	rplX	Flavobacterium johnsoniae (strain ATCC 17061 / DSM 2064 / UW101)	https://www.uniprot.org/uniprot/A5FMY9
AH-01_GM001932	94	4.4e-92	A6GZ87	50S ribosomal protein L5	rplE	Flavobacterium psychrophilum (strain JIP02/86 / ATCC 49511)	https://www.uniprot.org/uniprot/A6GZ87
AH-01_GM001933	91	8.5e-41	A5FN08	30S ribosomal protein S14	rpsN	Flavobacterium johnsoniae (strain ATCC 17061 / DSM 2064 / UW101)	https://www.uniprot.org/uniprot/A5FN08
AH-01_GM001934	88.6	3.8e-61	A5FN07	30S ribosomal protein S8	rpsH	Flavobacterium johnsoniae (strain ATCC 17061 / DSM 2064 / UW101)	https://www.uniprot.org/uniprot/A5FN07
AH-01_GM001935	84.5	1.3e-83	A6GZ84	50S ribosomal protein L6	rplF	Flavobacterium psychrophilum (strain JIP02/86 / ATCC 49511)	https://www.uniprot.org/uniprot/A6GZ84
AH-01_GM001936	62.8	3.9e-33	A6LPS7	50S ribosomal protein L18	rplR	Clostridium beijerinckii (strain ATCC 51743 / NCIMB 8052)	https://www.uniprot.org/uniprot/A6LPS7
AH-01_GM001937	93.7	3.1e-87	A6GZ82	30S ribosomal protein S5	rpsE	Flavobacterium psychrophilum (strain JIP02/86 / ATCC 49511)	https://www.uniprot.org/uniprot/A6GZ82
AH-01_GM001938	78.3	4.3e-20	A6GZ81	50S ribosomal protein L30	rpmD	Flavobacterium psychrophilum (strain JIP02/86 / ATCC 49511)	https://www.uniprot.org/uniprot/A6GZ81
AH-01_GM001939	90	1.9e-72	A6GZ80	50S ribosomal protein L15	rplO	Flavobacterium psychrophilum (strain JIP02/86 / ATCC 49511)	https://www.uniprot.org/uniprot/A6GZ80
AH-01_GM001941	97.2	6.8e-33	A5FN00	Translation initiation factor IF-1	infA	Flavobacterium johnsoniae (strain ATCC 17061 / DSM 2064 / UW101)	https://www.uniprot.org/uniprot/A5FN00
AH-01_GM001942	94.4	2.7e-61	A5FN18	30S ribosomal protein S13	rpsM	Flavobacterium johnsoniae (strain ATCC 17061 / DSM 2064 / UW101)	https://www.uniprot.org/uniprot/A5FN18
AH-01_GM001943	94.5	1.6e-64	A5FN17	30S ribosomal protein S11	rpsK	Flavobacterium johnsoniae (strain ATCC 17061 / DSM 2064 / UW101)	https://www.uniprot.org/uniprot/A5FN17
AH-01_GM001944	90	1.4e-102	A5FN16	30S ribosomal protein S4	rpsD	Flavobacterium johnsoniae (strain ATCC 17061 / DSM 2064 / UW101)	https://www.uniprot.org/uniprot/A5FN16
AH-01_GM001945	96.1	9.4e-178	A6GZ73	DNA-directed RNA polymerase subunit alpha	rpoA	Flavobacterium psychrophilum (strain JIP02/86 / ATCC 49511)	https://www.uniprot.org/uniprot/A6GZ73
AH-01_GM001946	90.5	2.5e-75	A5FN14	50S ribosomal protein L17	rplQ	Flavobacterium johnsoniae (strain ATCC 17061 / DSM 2064 / UW101)	https://www.uniprot.org/uniprot/A5FN14
AH-01_GM001947	46.6	2.2e-90	Q31LB7	Carbamoyl-phosphate synthase small chain	carA	Synechococcus elongatus (strain PCC 7942)	https://www.uniprot.org/uniprot/Q31LB7
AH-01_GM001948	90	9e-221	A5FN12	Enolase	eno	Flavobacterium johnsoniae (strain ATCC 17061 / DSM 2064 / UW101)	https://www.uniprot.org/uniprot/A5FN12
AH-01_GM002004	40.6	1.6e-33	B8DZX0	Endonuclease V	nfi	Dictyoglomus turgidum (strain Z-1310 / DSM 6724)	https://www.uniprot.org/uniprot/B8DZX0
AH-01_GM002006	53.4	8.6e-131	P9WPD4	Citrate synthase 1	gltA2	Mycobacterium tuberculosis (strain CDC 1551 / Oshkosh)	https://www.uniprot.org/uniprot/P9WPD4
AH-01_GM002014	76.7	4.3e-88	A6GZ60	Recombination protein RecR	recR	Flavobacterium psychrophilum (strain JIP02/86 / ATCC 49511)	https://www.uniprot.org/uniprot/A6GZ60
AH-01_GM002017	54.9	4.5e-92	Q7BJX9	UDP-N-acetylglucosamine 4-epimerase	wbgU	Plesiomonas shigelloides	https://www.uniprot.org/uniprot/Q7BJX9
AH-01_GM002018	58.6	1.4e-141	Q04972	Vi polysaccharide biosynthesis protein VipA/TviB	vipA	Salmonella typhi	https://www.uniprot.org/uniprot/Q04972
AH-01_GM002019	62	2.4e-163	Q9AUV6	UDP-glucose 6-dehydrogenase 3	UGD3	Oryza sativa subsp. japonica	https://www.uniprot.org/uniprot/Q9AUV6
AH-01_GM002020	57.3	4.7e-111	P37777	dTDP-glucose 4,6-dehydratase	rfbB	Shigella flexneri	https://www.uniprot.org/uniprot/P37777
AH-01_GM002021	64.7	4.5e-107	P37779	Glucose-1-phosphate thymidylyltransferase 1	rfbA	Shigella flexneri	https://www.uniprot.org/uniprot/P37779
AH-01_GM002022	48.2	5.1e-46	P37750	Putative lipopolysaccharide biosynthesis O-acetyl transferase WbbJ	wbbJ	Escherichia coli (strain K12)	https://www.uniprot.org/uniprot/P37750
AH-01_GM002026	60.2	7.7e-64	Q0P9D0	Undecaprenyl phosphate N,N'-diacetylbacillosamine 1-phosphate transferase	pglC	Campylobacter jejuni subsp. jejuni serotype O:2 (strain ATCC 700819 / NCTC 11168)	https://www.uniprot.org/uniprot/Q0P9D0
AH-01_GM002036	50	2.8e-101	Q795J3	Putative pyridoxal phosphate-dependent aminotransferase EpsN	epsN	Bacillus subtilis (strain 168)	https://www.uniprot.org/uniprot/Q795J3
AH-01_GM002037	42	9.1e-92	P71052	Probable polysaccharide biosynthesis protein EpsC	epsC	Bacillus subtilis (strain 168)	https://www.uniprot.org/uniprot/P71052
AH-01_GM002045	56.9	5.4e-77	P45073	Lipopolysaccharide export system ATP-binding protein LptB	lptB	Haemophilus influenzae (strain ATCC 51907 / DSM 11121 / KW20 / Rd)	https://www.uniprot.org/uniprot/P45073
AH-01_GM002047	41.9	3.1e-57	D0J948	Sec-independent protein translocase protein TatC	tatC	Blattabacterium sp. subsp. Periplaneta americana (strain BPLAN)	https://www.uniprot.org/uniprot/D0J948
AH-01_GM002048	48.1	2.7e-73	O67500	Uncharacterized phosphosugar isomerase aq_1546	aq_1546	Aquifex aeolicus (strain VF5)	https://www.uniprot.org/uniprot/O67500
AH-01_GM002049	40	1.6e-113	Q9CL21	ATP-dependent DNA helicase RecQ	recQ	Pasteurella multocida (strain Pm70)	https://www.uniprot.org/uniprot/Q9CL21
AH-01_GM002053	45.2	2.7e-52	Q50863	O-antigen export system ATP-binding protein RfbB	rfbB	Myxococcus xanthus	https://www.uniprot.org/uniprot/Q50863
AH-01_GM002055	54.8	2.2e-106	P27828	UDP-N-acetylglucosamine 2-epimerase	wecB	Escherichia coli (strain K12)	https://www.uniprot.org/uniprot/P27828
AH-01_GM002086	57.5	6.3e-52	A6GZJ6	Shikimate kinase	aroK	Flavobacterium psychrophilum (strain JIP02/86 / ATCC 49511)	https://www.uniprot.org/uniprot/A6GZJ6
AH-01_GM002104	48.1	1.2e-68	P46343	PhoH-like protein	phoH	Bacillus subtilis (strain 168)	https://www.uniprot.org/uniprot/P46343
AH-01_GM002108	46.7	1.4e-95	Q7TTP0	Flavohemoprotein	hmp	Bordetella pertussis (strain Tohama I / ATCC BAA-589 / NCTC 13251)	https://www.uniprot.org/uniprot/Q7TTP0
AH-01_GM002109	81.6	1.7e-152	A6GYJ4	Phosphoribosylaminoimidazole-succinocarboxamide synthase	purC	Flavobacterium psychrophilum (strain JIP02/86 / ATCC 49511)	https://www.uniprot.org/uniprot/A6GYJ4
AH-01_GM002125	51.2	2.6e-168	Q59189	DNA topoisomerase 4 subunit B	parE	Borrelia burgdorferi (strain ATCC 35210 / B31 / CIP 102532 / DSM 4680)	https://www.uniprot.org/uniprot/Q59189
AH-01_GM002129	71.2	1.6e-123	A5FE96	tRNA dimethylallyltransferase	miaA	Flavobacterium johnsoniae (strain ATCC 17061 / DSM 2064 / UW101)	https://www.uniprot.org/uniprot/A5FE96
AH-01_GM002130	52	4.6e-53	P26839	Virginiamycin A acetyltransferase	vat	Staphylococcus aureus	https://www.uniprot.org/uniprot/P26839
AH-01_GM002132	40.8	2.9e-26	Q5R4Z1	Pyridoxal phosphate homeostasis protein	PLPBP	Pongo abelii	https://www.uniprot.org/uniprot/Q5R4Z1
AH-01_GM002135	54.4	1.8e-79	P77851	3-hydroxybutyryl-CoA dehydrogenase	hbd	Thermoanaerobacterium thermosaccharolyticum (strain ATCC 7956 / DSM 571 / NCIB 9385 / NCA 3814)	https://www.uniprot.org/uniprot/P77851
AH-01_GM002138	43.4	1.9e-111	Q8ZD80	L-aspartate oxidase	nadB	Yersinia pestis	https://www.uniprot.org/uniprot/Q8ZD80
AH-01_GM002139	60.5	3.3e-106	P31179	Quinolinate synthase A	nadA	Cyanophora paradoxa	https://www.uniprot.org/uniprot/P31179
AH-01_GM002140	85.4	9.3e-102	A5FEA5	Protein-L-isoaspartate O-methyltransferase	pcm	Flavobacterium johnsoniae (strain ATCC 17061 / DSM 2064 / UW101)	https://www.uniprot.org/uniprot/A5FEA5
AH-01_GM002141	85.3	2.8e-68	A6H0S6	SsrA-binding protein	smpB	Flavobacterium psychrophilum (strain JIP02/86 / ATCC 49511)	https://www.uniprot.org/uniprot/A6H0S6
AH-01_GM002144	45.5	1.4e-113	O07576	Uncharacterized amino acid permease YhdG	yhdG	Bacillus subtilis (strain 168)	https://www.uniprot.org/uniprot/O07576
AH-01_GM002147	52.9	3.6e-89	P34879	Modification methylase SsoII	ssoIIM	Shigella sonnei	https://www.uniprot.org/uniprot/P34879
AH-01_GM002148	45.6	3e-07	P43640	Regulatory protein MunI	munIC	Mycoplasma sp.	https://www.uniprot.org/uniprot/P43640
AH-01_GM002149	71.5	7.9e-299	Q59677	Methylmalonyl-CoA mutase large subunit	mutB	Porphyromonas gingivalis (strain ATCC BAA-308 / W83)	https://www.uniprot.org/uniprot/Q59677
AH-01_GM002155	52.5	4.7e-55	Q4L6V8	Uridine kinase	udk	Staphylococcus haemolyticus (strain JCSC1435)	https://www.uniprot.org/uniprot/Q4L6V8
AH-01_GM002156	72.8	1.3e-102	A6GZI2	Triosephosphate isomerase	tpiA	Flavobacterium psychrophilum (strain JIP02/86 / ATCC 49511)	https://www.uniprot.org/uniprot/A6GZI2
AH-01_GM002158	65.9	2.5e-131	Q45FN5	Protein TlpB	tlpB	Flavobacterium psychrophilum	https://www.uniprot.org/uniprot/Q45FN5
AH-01_GM002160	43.4	5.5e-54	P0AC14	Dihydropteroate synthase	folP	Escherichia coli O6:H1 (strain CFT073 / ATCC 700928 / UPEC)	https://www.uniprot.org/uniprot/P0AC14
AH-01_GM002166	54.5	9.9e-71	A6LDA7	tRNA pseudouridine synthase A	truA	Parabacteroides distasonis (strain ATCC 8503 / DSM 20701 / CIP 104284 / JCM 5825 / NCTC 11152)	https://www.uniprot.org/uniprot/A6LDA7
AH-01_GM002168	74	1.4e-77	A6GZH5	Maf-like protein FP1422	FP1422	Flavobacterium psychrophilum (strain JIP02/86 / ATCC 49511)	https://www.uniprot.org/uniprot/A6GZH5
AH-01_GM002170	40.3	4.7e-27	Q8Z3G5	3-deoxy-D-manno-octulosonate 8-phosphate phosphatase KdsC	kdsC	Salmonella typhi	https://www.uniprot.org/uniprot/Q8Z3G5
AH-01_GM002174	50	2e-39	P38143	Glutathione peroxidase-like peroxiredoxin 2	GPX2	Saccharomyces cerevisiae (strain ATCC 204508 / S288c)	https://www.uniprot.org/uniprot/P38143
AH-01_GM002175	45.1	2.6e-32	Q9CFV1	Glutathione peroxidase	gpo	Lactococcus lactis subsp. lactis (strain IL1403)	https://www.uniprot.org/uniprot/Q9CFV1
AH-01_GM002180	40.2	5.2e-108	A0A0A1GKA2	Carotenoid 3,4-desaturase	crtD	Haloarcula japonica	https://www.uniprot.org/uniprot/A0A0A1GKA2
AH-01_GM002182	43.6	1.5e-24	P21688	Beta-carotene hydroxylase	crtZ	Pantoea ananas	https://www.uniprot.org/uniprot/P21688
AH-01_GM002185	42.2	1.4e-48	P05066	Deoxyribodipyrimidine photo-lyase, mitochondrial	PHR1	Saccharomyces cerevisiae (strain ATCC 204508 / S288c)	https://www.uniprot.org/uniprot/P05066
AH-01_GM002189	50.8	1.1e-173	O07631	GTP-binding protein TypA/BipA homolog	typA	Bacillus subtilis (strain 168)	https://www.uniprot.org/uniprot/O07631
AH-01_GM002190	89.2	1.9e-34	A5FA35	30S ribosomal protein S20	rpsT	Flavobacterium johnsoniae (strain ATCC 17061 / DSM 2064 / UW101)	https://www.uniprot.org/uniprot/A5FA35
AH-01_GM002191	83.9	6.6e-250	A6GZF3	Proline--tRNA ligase	proS	Flavobacterium psychrophilum (strain JIP02/86 / ATCC 49511)	https://www.uniprot.org/uniprot/A6GZF3
AH-01_GM002194	84.5	7.2e-218	A6GZF6	Ribosomal protein S12 methylthiotransferase RimO	rimO	Flavobacterium psychrophilum (strain JIP02/86 / ATCC 49511)	https://www.uniprot.org/uniprot/A6GZF6
AH-01_GM002205	49.8	8.2e-69	P33656	RNA polymerase sigma factor SigA	sigA	Clostridium acetobutylicum (strain ATCC 824 / DSM 792 / JCM 1419 / LMG 5710 / VKM B-1787)	https://www.uniprot.org/uniprot/P33656
AH-01_GM002206	82.4	0	A5FJZ1	Polyribonucleotide nucleotidyltransferase	pnp	Flavobacterium johnsoniae (strain ATCC 17061 / DSM 2064 / UW101)	https://www.uniprot.org/uniprot/A5FJZ1
AH-01_GM002207	84.3	2.4e-35	A5FJZ2	30S ribosomal protein S15	rpsO	Flavobacterium johnsoniae (strain ATCC 17061 / DSM 2064 / UW101)	https://www.uniprot.org/uniprot/A5FJZ2
AH-01_GM002208	42	1e-14	P36088	Free methionine-R-sulfoxide reductase	YKL069W	Saccharomyces cerevisiae (strain ATCC 204508 / S288c)	https://www.uniprot.org/uniprot/P36088
AH-01_GM002217	50.7	1.6e-58	P61517	Carbonic anhydrase 2	can	Escherichia coli (strain K12)	https://www.uniprot.org/uniprot/P61517
AH-01_GM002221	53.1	1.3e-246	Q2YB56	UPF0753 protein Nmul_A0708	Nmul_A0708	Nitrosospira multiformis (strain ATCC 25196 / NCIMB 11849 / C 71)	https://www.uniprot.org/uniprot/Q2YB56
AH-01_GM002233	43.2	1.3e-51	P51831	3-oxoacyl-[acyl-carrier-protein] reductase FabG	fabG	Bacillus subtilis (strain 168)	https://www.uniprot.org/uniprot/P51831
AH-01_GM002234	40.7	1.4e-77	P0A954	3-oxoacyl-[acyl-carrier-protein] synthase 1	fabB	Escherichia coli O6:H1 (strain CFT073 / ATCC 700928 / UPEC)	https://www.uniprot.org/uniprot/P0A954
AH-01_GM002235	40.8	7.2e-10	Q8RGX5	Acyl carrier protein	acpP	Fusobacterium nucleatum subsp. nucleatum (strain ATCC 25586 / CIP 101130 / JCM 8532 / LMG 13131)	https://www.uniprot.org/uniprot/Q8RGX5
AH-01_GM002243	48.1	6.5e-54	P94440	Uncharacterized ABC transporter ATP-binding protein YfiL	yfiL	Bacillus subtilis (strain 168)	https://www.uniprot.org/uniprot/P94440
AH-01_GM002268	61.3	4.4e-185	A5F9Z4	Putative cysteine ligase BshC	bshC	Flavobacterium johnsoniae (strain ATCC 17061 / DSM 2064 / UW101)	https://www.uniprot.org/uniprot/A5F9Z4
AH-01_GM002269	91.4	4.8e-67	A6GZG2	Nucleoside diphosphate kinase	ndk	Flavobacterium psychrophilum (strain JIP02/86 / ATCC 49511)	https://www.uniprot.org/uniprot/A6GZG2
AH-01_GM002273	47.7	5.7e-67	Q5LEW2	Ribosomal protein L11 methyltransferase	prmA	Bacteroides fragilis (strain ATCC 25285 / DSM 2151 / JCM 11019 / NCTC 9343)	https://www.uniprot.org/uniprot/Q5LEW2
AH-01_GM002276	65.3	2e-204	A6H070	2-succinyl-5-enolpyruvyl-6-hydroxy-3-cyclohexene-1-carboxylate synthase	menD	Flavobacterium psychrophilum (strain JIP02/86 / ATCC 49511)	https://www.uniprot.org/uniprot/A6H070
AH-01_GM002281	58.7	3e-153	Q8AA22	Uncharacterized RNA methyltransferase BT_0643	BT_0643	Bacteroides thetaiotaomicron (strain ATCC 29148 / DSM 2079 / NCTC 10582 / E50 / VPI-5482)	https://www.uniprot.org/uniprot/Q8AA22
AH-01_GM002291	63.6	3.8e-144	P49724	Ornithine aminotransferase, mitochondrial	Oat	Drosophila ananassae	https://www.uniprot.org/uniprot/P49724
AH-01_GM002299	82.5	7e-299	A0M353	Chaperone protein DnaK	dnaK	Gramella forsetii (strain KT0803)	https://www.uniprot.org/uniprot/A0M353
AH-01_GM002303	50.8	5.6e-30	P52761	RutC family protein slr0709	slr0709	Synechocystis sp. (strain PCC 6803 / Kazusa)	https://www.uniprot.org/uniprot/P52761
AH-01_GM002311	46.4	4.2e-89	P42982	N-acetyl-alpha-D-glucosaminyl L-malate synthase	bshA	Bacillus subtilis (strain 168)	https://www.uniprot.org/uniprot/P42982
AH-01_GM002315	86.3	8.2e-141	A6H0M8	4-hydroxy-tetrahydrodipicolinate synthase	dapA	Flavobacterium psychrophilum (strain JIP02/86 / ATCC 49511)	https://www.uniprot.org/uniprot/A6H0M8
AH-01_GM002318	46.1	6.7e-93	O35033	Probable coenzyme A biosynthesis bifunctional protein CoaBC	coaBC	Bacillus subtilis (strain 168)	https://www.uniprot.org/uniprot/O35033
AH-01_GM002321	79	5.8e-182	A5FE91	Enoyl-[acyl-carrier-protein] reductase [NADH]	fabV	Flavobacterium johnsoniae (strain ATCC 17061 / DSM 2064 / UW101)	https://www.uniprot.org/uniprot/A5FE91
AH-01_GM002325	51.3	2.9e-64	Q9AE24	Transcriptional regulatory protein RprY	rprY	Bacteroides fragilis (strain YCH46)	https://www.uniprot.org/uniprot/Q9AE24
AH-01_GM002348	65.3	7.6e-93	A0M6M4	N-acetylmuramic acid 6-phosphate etherase	murQ	Gramella forsetii (strain KT0803)	https://www.uniprot.org/uniprot/A0M6M4
AH-01_GM002352	43.8	7.1e-49	P67129	UPF0053 inner membrane protein YgdQ	ygdQ	Escherichia coli O157:H7	https://www.uniprot.org/uniprot/P67129
AH-01_GM002354	47.3	3.1e-78	O50310	Uncharacterized RNA pseudouridine synthase Cpar_0723	Cpar_0723	Chlorobaculum parvum (strain NCIB 8327)	https://www.uniprot.org/uniprot/O50310
AH-01_GM002356	75.9	9.2e-141	A6GXD5	D-alanine--D-alanine ligase	ddl	Flavobacterium psychrophilum (strain JIP02/86 / ATCC 49511)	https://www.uniprot.org/uniprot/A6GXD5
AH-01_GM002357	82	1.7e-65	A6GXD6	Phosphopantetheine adenylyltransferase	coaD	Flavobacterium psychrophilum (strain JIP02/86 / ATCC 49511)	https://www.uniprot.org/uniprot/A6GXD6
AH-01_GM002360	49.1	6.8e-19	P76569	Uncharacterized protein YfgD	yfgD	Escherichia coli (strain K12)	https://www.uniprot.org/uniprot/P76569
AH-01_GM002364	77.9	2.4e-186	A6H0H4	Imidazolonepropionase	hutI	Flavobacterium psychrophilum (strain JIP02/86 / ATCC 49511)	https://www.uniprot.org/uniprot/A6H0H4
AH-01_GM002367	44.1	1.4e-45	O32037	tRNA threonylcarbamoyladenosine dehydratase	tcdA	Bacillus subtilis (strain 168)	https://www.uniprot.org/uniprot/O32037
AH-01_GM002375	43.2	1.8e-93	P25888	ATP-dependent RNA helicase RhlE	rhlE	Escherichia coli (strain K12)	https://www.uniprot.org/uniprot/P25888
AH-01_GM002376	55.4	4.2e-105	P45867	Acyl-CoA dehydrogenase	acdA	Bacillus subtilis (strain 168)	https://www.uniprot.org/uniprot/P45867
AH-01_GM002380	45.2	1.4e-116	P45049	Competence protein ComM	comM	Haemophilus influenzae (strain ATCC 51907 / DSM 11121 / KW20 / Rd)	https://www.uniprot.org/uniprot/P45049
AH-01_GM002383	85.7	2.7e-178	A6H0W3	Peptide chain release factor 1	prfA	Flavobacterium psychrophilum (strain JIP02/86 / ATCC 49511)	https://www.uniprot.org/uniprot/A6H0W3
AH-01_GM002385	81.4	3.7e-127	A5FHG4	Orotidine 5'-phosphate decarboxylase	pyrF	Flavobacterium johnsoniae (strain ATCC 17061 / DSM 2064 / UW101)	https://www.uniprot.org/uniprot/A5FHG4
AH-01_GM002391	59.8	1.9e-124	P41338	Acetyl-CoA acetyltransferase	ERG10	Saccharomyces cerevisiae (strain ATCC 204508 / S288c)	https://www.uniprot.org/uniprot/P41338
AH-01_GM002393	81.3	3.2e-208	A6GXB2	tRNA modification GTPase MnmE	mnmE	Flavobacterium psychrophilum (strain JIP02/86 / ATCC 49511)	https://www.uniprot.org/uniprot/A6GXB2
AH-01_GM002404	54	6.6e-32	P0A0V4	Organic hydroperoxide resistance protein	ohr	Xanthomonas axonopodis pv. citri (strain 306)	https://www.uniprot.org/uniprot/P0A0V4
AH-01_GM002407	56.5	1.4e-153	Q9KRQ1	Catalase	VC_1585	Vibrio cholerae serotype O1 (strain ATCC 39315 / El Tor Inaba N16961)	https://www.uniprot.org/uniprot/Q9KRQ1
AH-01_GM002408	72.6	2.1e-221	Q9ZN99	Catalase	katA	Desulfovibrio vulgaris (strain Miyazaki F / DSM 19637)	https://www.uniprot.org/uniprot/Q9ZN99
AH-01_GM002409	40.8	1.9e-38	P21762	Alkyl hydroperoxide reductase C	ahpC	Helicobacter pylori (strain ATCC 700392 / 26695)	https://www.uniprot.org/uniprot/P21762
AH-01_GM002410	40.6	6.4e-08	P29445	Thioredoxin-1	trxA	Dictyostelium discoideum	https://www.uniprot.org/uniprot/P29445
AH-01_GM002415	40.8	5.7e-07	Q58721	Uncharacterized HTH-type transcriptional regulator MJ1325	MJ1325	Methanocaldococcus jannaschii (strain ATCC 43067 / DSM 2661 / JAL-1 / JCM 10045 / NBRC 100440)	https://www.uniprot.org/uniprot/Q58721
AH-01_GM002416	60.6	2.4e-49	Q8KED5	Thiol peroxidase	tpx	Chlorobaculum tepidum (strain ATCC 49652 / DSM 12025 / NBRC 103806 / TLS)	https://www.uniprot.org/uniprot/Q8KED5
AH-01_GM002425	87.8	0	A5FP01	Threonine--tRNA ligase	thrS	Flavobacterium johnsoniae (strain ATCC 17061 / DSM 2064 / UW101)	https://www.uniprot.org/uniprot/A5FP01
AH-01_GM002426	65.5	7.8e-55	A6L9S3	Translation initiation factor IF-3	infC	Parabacteroides distasonis (strain ATCC 8503 / DSM 20701 / CIP 104284 / JCM 5825 / NCTC 11152)	https://www.uniprot.org/uniprot/A6L9S3
AH-01_GM002427	92.3	3.9e-27	A6GY20	50S ribosomal protein L35	rpmI	Flavobacterium psychrophilum (strain JIP02/86 / ATCC 49511)	https://www.uniprot.org/uniprot/A6GY20
AH-01_GM002428	95.6	1.6e-55	A5FP04	50S ribosomal protein L20	rplT	Flavobacterium johnsoniae (strain ATCC 17061 / DSM 2064 / UW101)	https://www.uniprot.org/uniprot/A5FP04
AH-01_GM002429	54.8	9.7e-89	A5FHX5	Ribosomal RNA large subunit methyltransferase F	rlmF	Flavobacterium johnsoniae (strain ATCC 17061 / DSM 2064 / UW101)	https://www.uniprot.org/uniprot/A5FHX5
AH-01_GM002431	41.6	3.6e-99	P37469	Replicative DNA helicase	dnaC	Bacillus subtilis (strain 168)	https://www.uniprot.org/uniprot/P37469
AH-01_GM002432	78.9	4.4e-148	A6GX95	Acetyl-coenzyme A carboxylase carboxyl transferase subunit alpha	accA	Flavobacterium psychrophilum (strain JIP02/86 / ATCC 49511)	https://www.uniprot.org/uniprot/A6GX95
AH-01_GM002435	55	2.7e-112	Q8RAM9	Queuine tRNA-ribosyltransferase	tgt	Caldanaerobacter subterraneus subsp. tengcongensis (strain DSM 15242 / JCM 11007 / NBRC 100824 / MB4)	https://www.uniprot.org/uniprot/Q8RAM9
AH-01_GM002436	47.1	3.1e-60	Q58094	Putative transketolase N-terminal section	MJ0681	Methanocaldococcus jannaschii (strain ATCC 43067 / DSM 2661 / JAL-1 / JCM 10045 / NBRC 100440)	https://www.uniprot.org/uniprot/Q58094
AH-01_GM002437	45.3	1.4e-66	Q58092	Putative transketolase C-terminal section	MJ0679	Methanocaldococcus jannaschii (strain ATCC 43067 / DSM 2661 / JAL-1 / JCM 10045 / NBRC 100440)	https://www.uniprot.org/uniprot/Q58092
AH-01_GM002440	41.1	5.4e-08	Q9KDI4	Sec translocon accessory complex subunit YajC	yajC	Bacillus halodurans (strain ATCC BAA-125 / DSM 18197 / FERM 7344 / JCM 9153 / C-125)	https://www.uniprot.org/uniprot/Q9KDI4
AH-01_GM002442	44.8	4.3e-20	Q3B298	Transcription antitermination protein NusB	nusB	Chlorobium luteolum (strain DSM 273 / 2530)	https://www.uniprot.org/uniprot/Q3B298
AH-01_GM002443	54.8	3.6e-109	Q60030	Leucine dehydrogenase	ldh	Thermoactinomyces intermedius	https://www.uniprot.org/uniprot/Q60030
AH-01_GM002447	54	1.9e-254	O50628	DNA gyrase subunit A	gyrA	Bacillus halodurans (strain ATCC BAA-125 / DSM 18197 / FERM 7344 / JCM 9153 / C-125)	https://www.uniprot.org/uniprot/O50628
AH-01_GM002448	50.4	6.9e-241	P37571	Negative regulator of genetic competence ClpC/MecB	clpC	Bacillus subtilis (strain 168)	https://www.uniprot.org/uniprot/P37571
AH-01_GM002449	67.4	1.9e-176	A8H4D4	Probable alpha-L-glutamate ligase	rimK	Shewanella pealeana (strain ATCC 700345 / ANG-SQ1)	https://www.uniprot.org/uniprot/A8H4D4
AH-01_GM002451	64.6	6.7e-202	A5FG48	UPF0061 protein Fjoh_2793	Fjoh_2793	Flavobacterium johnsoniae (strain ATCC 17061 / DSM 2064 / UW101)	https://www.uniprot.org/uniprot/A5FG48
AH-01_GM002460	42.2	4.1e-76	P39576	Branched-chain-amino-acid aminotransferase 2	ilvK	Bacillus subtilis (strain 168)	https://www.uniprot.org/uniprot/P39576
AH-01_GM002465	59.5	3.2e-21	A6H0J1	Putative fluoride ion transporter CrcB	crcB	Flavobacterium psychrophilum (strain JIP02/86 / ATCC 49511)	https://www.uniprot.org/uniprot/A6H0J1
AH-01_GM002467	40.7	6e-92	O07576	Uncharacterized amino acid permease YhdG	yhdG	Bacillus subtilis (strain 168)	https://www.uniprot.org/uniprot/O07576
AH-01_GM002470	44.3	6.5e-33	Q796Y8	Peroxiredoxin Bcp	ygaF	Bacillus subtilis (strain 168)	https://www.uniprot.org/uniprot/Q796Y8
AH-01_GM002471	40.1	1.9e-33	P39788	Endonuclease III	nth	Bacillus subtilis (strain 168)	https://www.uniprot.org/uniprot/P39788
AH-01_GM002474	54.5	7.9e-70	P0A3Q8	Glycerol uptake facilitator protein	glpF	Streptococcus pneumoniae (strain ATCC BAA-255 / R6)	https://www.uniprot.org/uniprot/P0A3Q8
AH-01_GM002476	65	9.1e-193	Q7P1G2	Glycerol kinase	glpK	Chromobacterium violaceum (strain ATCC 12472 / DSM 30191 / JCM 1249 / NBRC 12614 / NCIMB 9131 / NCTC 9757)	https://www.uniprot.org/uniprot/Q7P1G2
AH-01_GM002477	68.6	0	Q89YY3	Chaperone protein ClpB	clpB	Bacteroides thetaiotaomicron (strain ATCC 29148 / DSM 2079 / NCTC 10582 / E50 / VPI-5482)	https://www.uniprot.org/uniprot/Q89YY3
AH-01_GM002482	75.6	3.9e-92	A5FB76	Pyridoxine/pyridoxamine 5'-phosphate oxidase	pdxH	Flavobacterium johnsoniae (strain ATCC 17061 / DSM 2064 / UW101)	https://www.uniprot.org/uniprot/A5FB76
AH-01_GM002483	45.1	1.2e-70	A6LFA6	Ribonuclease Z	rnz	Parabacteroides distasonis (strain ATCC 8503 / DSM 20701 / CIP 104284 / JCM 5825 / NCTC 11152)	https://www.uniprot.org/uniprot/A6LFA6
AH-01_GM002485	41.7	4.3e-72	A6LEZ7	3-dehydroquinate synthase	aroB	Parabacteroides distasonis (strain ATCC 8503 / DSM 20701 / CIP 104284 / JCM 5825 / NCTC 11152)	https://www.uniprot.org/uniprot/A6LEZ7
AH-01_GM002491	91.6	3.5e-158	A6H0I8	Aspartate carbamoyltransferase	pyrB	Flavobacterium psychrophilum (strain JIP02/86 / ATCC 49511)	https://www.uniprot.org/uniprot/A6H0I8
AH-01_GM002492	43.9	1.1e-31	B7KKJ9	Bifunctional protein PyrR	pyrR	Cyanothece sp. (strain PCC 7424)	https://www.uniprot.org/uniprot/B7KKJ9
AH-01_GM002494	43.6	2.5e-128	O84100	30S ribosomal protein S1	rpsA	Chlamydia trachomatis (strain D/UW-3/Cx)	https://www.uniprot.org/uniprot/O84100
AH-01_GM002495	50.9	2.1e-118	P45562	Xanthosine permease	xapB	Escherichia coli (strain K12)	https://www.uniprot.org/uniprot/P45562
AH-01_GM002496	65.3	6.2e-80	A5FG91	Cytidylate kinase	cmk	Flavobacterium johnsoniae (strain ATCC 17061 / DSM 2064 / UW101)	https://www.uniprot.org/uniprot/A5FG91
AH-01_GM002498	79.2	0	A5FG89	Lon protease	lon	Flavobacterium johnsoniae (strain ATCC 17061 / DSM 2064 / UW101)	https://www.uniprot.org/uniprot/A5FG89
AH-01_GM002502	41.5	2.2e-16	O83845	tRNA threonylcarbamoyladenosine biosynthesis protein TsaE	tsaE	Treponema pallidum (strain Nichols)	https://www.uniprot.org/uniprot/O83845
AH-01_GM002507	89.6	3.6e-144	A6GZM5	Bifunctional protein FolD	folD	Flavobacterium psychrophilum (strain JIP02/86 / ATCC 49511)	https://www.uniprot.org/uniprot/A6GZM5
AH-01_GM002508	54	1e-129	P37105	Signal recognition particle protein	ffh	Bacillus subtilis (strain 168)	https://www.uniprot.org/uniprot/P37105
AH-01_GM002509	61.9	1.5e-260	P27028	Prolyl endopeptidase	f1pep1	Elizabethkingia meningoseptica	https://www.uniprot.org/uniprot/P27028
AH-01_GM002513	40.8	1.2e-149	O34580	ATP-dependent DNA helicase PcrA	pcrA	Bacillus subtilis (strain 168)	https://www.uniprot.org/uniprot/O34580
AH-01_GM002514	63.8	5.6e-66	A5FH89	dITP/XTP pyrophosphatase	Fjoh_2403	Flavobacterium johnsoniae (strain ATCC 17061 / DSM 2064 / UW101)	https://www.uniprot.org/uniprot/A5FH89
AH-01_GM002519	46.9	6e-09	P33355	Uncharacterized protein YehS	yehS	Escherichia coli (strain K12)	https://www.uniprot.org/uniprot/P33355
AH-01_GM002525	47	1.7e-139	Q9HCC0	Methylcrotonoyl-CoA carboxylase beta chain, mitochondrial	MCCC2	Homo sapiens	https://www.uniprot.org/uniprot/Q9HCC0
AH-01_GM002530	40.9	8.7e-38	A9BJK2	tRNA(Ile)-lysidine synthase	tilS	Petrotoga mobilis (strain DSM 10674 / SJ95)	https://www.uniprot.org/uniprot/A9BJK2
AH-01_GM002535	45.8	1.5e-61	P37556	Uncharacterized protein YabN	yabN	Bacillus subtilis (strain 168)	https://www.uniprot.org/uniprot/P37556
AH-01_GM002537	79.8	1.9e-85	A6H0E7	Peptide deformylase	def	Flavobacterium psychrophilum (strain JIP02/86 / ATCC 49511)	https://www.uniprot.org/uniprot/A6H0E7
AH-01_GM002538	77.5	1.5e-227	A6H0E6	Probable malate:quinone oxidoreductase	mqo	Flavobacterium psychrophilum (strain JIP02/86 / ATCC 49511)	https://www.uniprot.org/uniprot/A6H0E6
AH-01_GM002539	75.9	2.3e-53	A6H0E5	Putative pre-16S rRNA nuclease	FP1751	Flavobacterium psychrophilum (strain JIP02/86 / ATCC 49511)	https://www.uniprot.org/uniprot/A6H0E5
AH-01_GM002540	55.6	5.4e-70	B3R2C8	2,3,4,5-tetrahydropyridine-2,6-dicarboxylate N-succinyltransferase	dapD	Cupriavidus taiwanensis (strain DSM 17343 / BCRC 17206 / CIP 107171 / LMG 19424 / R1)	https://www.uniprot.org/uniprot/B3R2C8
AH-01_GM002548	45.6	5.2e-75	Q606L3	3-oxoacyl-[acyl-carrier-protein] synthase 3	fabH	Methylococcus capsulatus (strain ATCC 33009 / NCIMB 11132 / Bath)	https://www.uniprot.org/uniprot/Q606L3
AH-01_GM002553	43.4	2.2e-16	Q05146	Outer membrane protein A	ompA	Bordetella avium	https://www.uniprot.org/uniprot/Q05146
AH-01_GM002555	57.8	2.7e-189	Q8A9B8	Chaperone protein HtpG	htpG	Bacteroides thetaiotaomicron (strain ATCC 29148 / DSM 2079 / NCTC 10582 / E50 / VPI-5482)	https://www.uniprot.org/uniprot/Q8A9B8
AH-01_GM002556	41.5	1.5e-07	P39158	Cold shock protein CspC	cspC	Bacillus subtilis (strain 168)	https://www.uniprot.org/uniprot/P39158
AH-01_GM002565	42.3	4.5e-34	Q96Q83	Alpha-ketoglutarate-dependent dioxygenase alkB homolog 3	ALKBH3	Homo sapiens	https://www.uniprot.org/uniprot/Q96Q83
AH-01_GM002566	40	1.9e-86	P94535	Glycolate oxidase subunit GlcD	glcD	Bacillus subtilis (strain 168)	https://www.uniprot.org/uniprot/P94535
AH-01_GM002570	46.7	3e-76	P37895	Putative GTPase CC_2483	CC_2483	Caulobacter vibrioides (strain ATCC 19089 / CB15)	https://www.uniprot.org/uniprot/P37895
AH-01_GM002577	55.9	1.9e-85	Q59603	Modification methylase NgoBI	ngoBIM	Neisseria gonorrhoeae	https://www.uniprot.org/uniprot/Q59603
AH-01_GM002586	60.6	6e-91	P28638	DNA adenine methyltransferase YhdJ	yhdJ	Escherichia coli (strain K12)	https://www.uniprot.org/uniprot/P28638
AH-01_GM002596	57.1	8.8e-95	Q4ULQ8	Succinate--CoA ligase [ADP-forming] subunit alpha	sucD	Rickettsia felis (strain ATCC VR-1525 / URRWXCal2)	https://www.uniprot.org/uniprot/Q4ULQ8
AH-01_GM002597	43.7	5.1e-40	B1ZLC2	UDP-3-O-acylglucosamine N-acyltransferase	lpxD	Methylobacterium populi (strain ATCC BAA-705 / NCIMB 13946 / BJ001)	https://www.uniprot.org/uniprot/B1ZLC2
AH-01_GM002598	89.4	4.8e-94	A5FFT9	Elongation factor P	efp	Flavobacterium johnsoniae (strain ATCC 17061 / DSM 2064 / UW101)	https://www.uniprot.org/uniprot/A5FFT9
AH-01_GM002599	47.2	6.7e-62	A1BIY4	Acyl-[acyl-carrier-protein]--UDP-N-acetylglucosamine O-acyltransferase	lpxA	Chlorobium phaeobacteroides (strain DSM 266)	https://www.uniprot.org/uniprot/A1BIY4
AH-01_GM002600	51.3	7.8e-138	Q8A015	Bifunctional enzyme LpxC/FabZ	lpxC/fabZ	Bacteroides thetaiotaomicron (strain ATCC 29148 / DSM 2079 / NCTC 10582 / E50 / VPI-5482)	https://www.uniprot.org/uniprot/Q8A015
AH-01_GM002601	64.3	3.5e-127	A0M2A1	UDP-3-O-acylglucosamine N-acyltransferase	lpxD	Gramella forsetii (strain KT0803)	https://www.uniprot.org/uniprot/A0M2A1
AH-01_GM002605	42.3	1.2e-63	P96554	Uncharacterized membrane protein STKORF319	3 SV	Myxococcus xanthus	https://www.uniprot.org/uniprot/P96554
AH-01_GM002609	42.8	7.9e-104	P76481	Uncharacterized protein YfbK	yfbK	Escherichia coli (strain K12)	https://www.uniprot.org/uniprot/P76481
AH-01_GM002614	45.3	3.2e-125	P18956	Glutathione hydrolase proenzyme	ggt	Escherichia coli (strain K12)	https://www.uniprot.org/uniprot/P18956
AH-01_GM002617	45.4	7.4e-89	P14375	Transcriptional regulatory protein ZraR	zraR	Escherichia coli (strain K12)	https://www.uniprot.org/uniprot/P14375
AH-01_GM002619	41.2	1.7e-59	C0SPB4	Uncharacterized ABC transporter ATP-binding protein YhaQ	yhaQ	Bacillus subtilis (strain 168)	https://www.uniprot.org/uniprot/C0SPB4
AH-01_GM002620	52.4	2.3e-111	Q8A8C3	Chaperone protein DnaJ	dnaJ	Bacteroides thetaiotaomicron (strain ATCC 29148 / DSM 2079 / NCTC 10582 / E50 / VPI-5482)	https://www.uniprot.org/uniprot/Q8A8C3
AH-01_GM002621	43.9	1.2e-33	Q8A8C4	Protein GrpE	grpE	Bacteroides thetaiotaomicron (strain ATCC 29148 / DSM 2079 / NCTC 10582 / E50 / VPI-5482)	https://www.uniprot.org/uniprot/Q8A8C4
AH-01_GM002627	42.2	1.1e-13	C0H3Y4	Putative DNA-binding protein YizB	yizB	Bacillus subtilis (strain 168)	https://www.uniprot.org/uniprot/C0H3Y4
AH-01_GM002635	52.8	2.1e-86	Q1RJD8	Thioredoxin reductase	trxB	Rickettsia bellii (strain RML369-C)	https://www.uniprot.org/uniprot/Q1RJD8
AH-01_GM002637	48	3.3e-79	P51835	Signal recognition particle receptor FtsY	ftsY	Bacillus subtilis (strain 168)	https://www.uniprot.org/uniprot/P51835
AH-01_GM002639	100	4.3e-28	A5F9Z0	50S ribosomal protein L33	rpmG	Flavobacterium johnsoniae (strain ATCC 17061 / DSM 2064 / UW101)	https://www.uniprot.org/uniprot/A5F9Z0
AH-01_GM002640	93.6	3.6e-35	A6GZI6	50S ribosomal protein L28	rpmB	Flavobacterium psychrophilum (strain JIP02/86 / ATCC 49511)	https://www.uniprot.org/uniprot/A6GZI6
AH-01_GM002641	68	1.9e-167	A6GZI7	CinA-like protein	FP1434	Flavobacterium psychrophilum (strain JIP02/86 / ATCC 49511)	https://www.uniprot.org/uniprot/A6GZI7
AH-01_GM002643	40.6	3.6e-19	Q96GK7	Fumarylacetoacetate hydrolase domain-containing protein 2A	FAHD2A	Homo sapiens	https://www.uniprot.org/uniprot/Q96GK7
AH-01_GM002652	42.5	1.3e-140	O06476	Uncharacterized ABC transporter ATP-binding protein YfmR	yfmR	Bacillus subtilis (strain 168)	https://www.uniprot.org/uniprot/O06476
AH-01_GM002658	57.8	1.3e-69	O31711	Uncharacterized ABC transporter ATP-binding protein YknY	yknY	Bacillus subtilis (strain 168)	https://www.uniprot.org/uniprot/O31711
AH-01_GM002660	45.5	7.6e-31	O34899	Cob(I)yrinic acid a,c-diamide adenosyltransferase	yvqK	Bacillus subtilis (strain 168)	https://www.uniprot.org/uniprot/O34899
AH-01_GM002662	82.4	0	A6GX63	Protein translocase subunit SecA	secA	Flavobacterium psychrophilum (strain JIP02/86 / ATCC 49511)	https://www.uniprot.org/uniprot/A6GX63
AH-01_GM002676	43.1	1.1e-119	Q9KJX5	Alkaline phosphatase PafA	pafA	Elizabethkingia meningoseptica	https://www.uniprot.org/uniprot/Q9KJX5
AH-01_GM002677	41.3	6.9e-84	P77806	Methionine aminotransferase	ybdL	Escherichia coli (strain K12)	https://www.uniprot.org/uniprot/P77806
AH-01_GM002678	61.4	1.1e-77	P37522	Sporulation initiation inhibitor protein Soj	soj	Bacillus subtilis (strain 168)	https://www.uniprot.org/uniprot/P37522
AH-01_GM002679	41.6	7.2e-52	P0A151	Probable chromosome-partitioning protein ParB	parB	Pseudomonas putida (strain ATCC 47054 / DSM 6125 / NCIMB 11950 / KT2440)	https://www.uniprot.org/uniprot/P0A151
AH-01_GM002681	59.3	2.9e-72	A0LZI4	4-hydroxy-tetrahydrodipicolinate reductase	dapB	Gramella forsetii (strain KT0803)	https://www.uniprot.org/uniprot/A0LZI4
AH-01_GM002687	79	3.1e-286	A6GYR1	DNA mismatch repair protein MutL	mutL	Flavobacterium psychrophilum (strain JIP02/86 / ATCC 49511)	https://www.uniprot.org/uniprot/A6GYR1
AH-01_GM002688	77.6	3.9e-68	A6H143	6,7-dimethyl-8-ribityllumazine synthase	ribH	Flavobacterium psychrophilum (strain JIP02/86 / ATCC 49511)	https://www.uniprot.org/uniprot/A6H143
AH-01_GM002690	80.5	2.4e-166	A6H141	DNA replication and repair protein RecF	recF	Flavobacterium psychrophilum (strain JIP02/86 / ATCC 49511)	https://www.uniprot.org/uniprot/A6H141
AH-01_GM002691	41	6.9e-18	P80579	Thioredoxin	trxA	Alicyclobacillus acidocaldarius	https://www.uniprot.org/uniprot/P80579
AH-01_GM002693	74.8	4.2e-149	A5FNG4	UDP-N-acetylenolpyruvoylglucosamine reductase	murB	Flavobacterium johnsoniae (strain ATCC 17061 / DSM 2064 / UW101)	https://www.uniprot.org/uniprot/A5FNG4
AH-01_GM002708	61.7	1.7e-51	O66105	Probable peptidyl-prolyl cis-trans isomerase	ppiB	Treponema pallidum (strain Nichols)	https://www.uniprot.org/uniprot/O66105
AH-01_GM002712	83.6	7.8e-107	A5FHV7	tRNA (guanine-N(1)-)-methyltransferase	trmD	Flavobacterium johnsoniae (strain ATCC 17061 / DSM 2064 / UW101)	https://www.uniprot.org/uniprot/A5FHV7
AH-01_GM002713	42.7	3.7e-47	A5JYX5	Protein dhs-3	dhs-3	Caenorhabditis elegans	https://www.uniprot.org/uniprot/A5JYX5
AH-01_GM002716	82.8	1e-49	A5FHV5	50S ribosomal protein L19	rplS	Flavobacterium johnsoniae (strain ATCC 17061 / DSM 2064 / UW101)	https://www.uniprot.org/uniprot/A5FHV5
AH-01_GM002721	46.3	7.4e-138	P22772	Modification methylase BanIII	banIIIM	Aneurinibacillus aneurinilyticus	https://www.uniprot.org/uniprot/P22772
AH-01_GM002724	50.8	4e-10	P23939	BamHI control element	4 SV	Bacillus amyloliquefaciens	https://www.uniprot.org/uniprot/P23939
AH-01_GM002728	65	2.6e-276	P16100	Isocitrate dehydrogenase [NADP]	icd	Azotobacter vinelandii	https://www.uniprot.org/uniprot/P16100
AH-01_GM002729	77.5	1.1e-64	P00472	Modification methylase EcoRI	ecoRIM	Escherichia coli	https://www.uniprot.org/uniprot/P00472
AH-01_GM002731	64.1	8e-253	Q5LC24	UvrABC system protein B	uvrB	Bacteroides fragilis (strain ATCC 25285 / DSM 2151 / JCM 11019 / NCTC 9343)	https://www.uniprot.org/uniprot/Q5LC24
AH-01_GM002733	76.5	1.5e-271	A5FND6	Arginine--tRNA ligase	argS	Flavobacterium johnsoniae (strain ATCC 17061 / DSM 2064 / UW101)	https://www.uniprot.org/uniprot/A5FND6
AH-01_GM002739	56	1.6e-91	P44169	Uncharacterized protein HI_1375	HI_1375	Haemophilus influenzae (strain ATCC 51907 / DSM 11121 / KW20 / Rd)	https://www.uniprot.org/uniprot/P44169
AH-01_GM002748	53.1	9.8e-37	Q9LU86	Peroxiredoxin Q, chloroplastic	PRXQ	Arabidopsis thaliana	https://www.uniprot.org/uniprot/Q9LU86
AH-01_GM002749	47.3	5.4e-31	Q03393	6-pyruvoyl tetrahydrobiopterin synthase	PTS	Homo sapiens	https://www.uniprot.org/uniprot/Q03393
AH-01_GM002750	45.8	2.2e-40	Q6D3F5	Isopentenyl-diphosphate Delta-isomerase	idi	Pectobacterium atrosepticum (strain SCRI 1043 / ATCC BAA-672)	https://www.uniprot.org/uniprot/Q6D3F5
AH-01_GM002751	41.1	3.2e-95	Q05627	Uncharacterized protein Cbei_0202	Cbei_0202	Clostridium beijerinckii (strain ATCC 51743 / NCIMB 8052)	https://www.uniprot.org/uniprot/Q05627
AH-01_GM002758	50.3	2e-44	P77368	UPF0098 protein YbcL	ybcL	Escherichia coli (strain K12)	https://www.uniprot.org/uniprot/P77368
AH-01_GM002765	42.9	3.4e-53	Q5P2R7	Adenosylcobinamide-GDP ribazoletransferase	cobS	Aromatoleum aromaticum (strain EbN1)	https://www.uniprot.org/uniprot/Q5P2R7
AH-01_GM002766	54.2	2.5e-93	Q47JS4	Nicotinate-nucleotide--dimethylbenzimidazole phosphoribosyltransferase	cobT	Dechloromonas aromatica (strain RCB)	https://www.uniprot.org/uniprot/Q47JS4
AH-01_GM002774	44.5	3.5e-28	P72581	Uncharacterized RNA pseudouridine synthase slr0612	slr0612	Synechocystis sp. (strain PCC 6803 / Kazusa)	https://www.uniprot.org/uniprot/P72581
AH-01_GM002777	41.6	1.5e-96	Q9KVQ7	DNA recombination protein RmuC homolog	rmuC	Vibrio cholerae serotype O1 (strain ATCC 39315 / El Tor Inaba N16961)	https://www.uniprot.org/uniprot/Q9KVQ7
AH-01_GM002780	42.1	3.5e-25	P0A0Q8	Protein VdlD	vdlD	Helicobacter pylori (strain J99 / ATCC 700824)	https://www.uniprot.org/uniprot/P0A0Q8
AH-01_GM002785	66	4.2e-111	A6H0G8	Na(+)/H(+) antiporter NhaA	nhaA	Flavobacterium psychrophilum (strain JIP02/86 / ATCC 49511)	https://www.uniprot.org/uniprot/A6H0G8
AH-01_GM002789	54	5.9e-289	O28994	Carbamoyl-phosphate synthase large chain	carB	Archaeoglobus fulgidus (strain ATCC 49558 / VC-16 / DSM 4304 / JCM 9628 / NBRC 100126)	https://www.uniprot.org/uniprot/O28994
AH-01_GM002790	90	2.1e-18	A0M0A2	50S ribosomal protein L34	rpmH	Gramella forsetii (strain KT0803)	https://www.uniprot.org/uniprot/A0M0A2
AH-01_GM002797	40.7	3.8e-89	P54462	Threonylcarbamoyladenosine tRNA methylthiotransferase MtaB	mtaB	Bacillus subtilis (strain 168)	https://www.uniprot.org/uniprot/P54462
AH-01_GM002798	61.9	1.6e-159	P07346	Aspartate ammonia-lyase	aspA	Pseudomonas fluorescens	https://www.uniprot.org/uniprot/P07346
AH-01_GM002801	73.5	4.8e-30	A6LDB6	50S ribosomal protein L31 type B	rpmE2	Parabacteroides distasonis (strain ATCC 8503 / DSM 20701 / CIP 104284 / JCM 5825 / NCTC 11152)	https://www.uniprot.org/uniprot/A6LDB6
AH-01_GM002804	43.9	5.4e-120	P18159	Phosphoglucomutase	pgcA	Bacillus subtilis (strain 168)	https://www.uniprot.org/uniprot/P18159
AH-01_GM002805	40.1	2.8e-111	Q6AJW3	Lipid A export ATP-binding/permease protein MsbA	msbA	Desulfotalea psychrophila (strain LSv54 / DSM 12343)	https://www.uniprot.org/uniprot/Q6AJW3
AH-01_GM002812	86.7	1.1e-257	A5FNQ7	Ribonuclease Y	rny	Flavobacterium johnsoniae (strain ATCC 17061 / DSM 2064 / UW101)	https://www.uniprot.org/uniprot/A5FNQ7
AH-01_GM002816	42	1.1e-34	Q11U74	UPF0301 protein CHU_1773	CHU_1773	Cytophaga hutchinsonii (strain ATCC 33406 / NCIMB 9469)	https://www.uniprot.org/uniprot/Q11U74
AH-01_GM002817	55.6	1.1e-19	Q9KQS9	DNA-binding protein HU-beta	hupB	Vibrio cholerae serotype O1 (strain ATCC 39315 / El Tor Inaba N16961)	https://www.uniprot.org/uniprot/Q9KQS9
AH-01_GM002818	72.7	3.1e-130	A6H148	Methionyl-tRNA formyltransferase	fmt	Flavobacterium psychrophilum (strain JIP02/86 / ATCC 49511)	https://www.uniprot.org/uniprot/A6H148
AH-01_GM002819	42.9	2e-75	P15043	ATP-dependent DNA helicase RecQ	recQ	Escherichia coli (strain K12)	https://www.uniprot.org/uniprot/P15043
AH-01_GM002823	68.5	6.6e-171	Q8A681	UDP-N-acetylglucosamine 1-carboxyvinyltransferase	murA	Bacteroides thetaiotaomicron (strain ATCC 29148 / DSM 2079 / NCTC 10582 / E50 / VPI-5482)	https://www.uniprot.org/uniprot/Q8A681
AH-01_GM002825	54.7	1.1e-35	Q46H25	3-dehydroquinate dehydratase	aroQ	Prochlorococcus marinus (strain NATL2A)	https://www.uniprot.org/uniprot/Q46H25
AH-01_GM002828	40.3	1.3e-61	Q92A53	Tyrosine recombinase XerD	xerD	Listeria innocua serovar 6a (strain ATCC BAA-680 / CLIP 11262)	https://www.uniprot.org/uniprot/Q92A53
AH-01_GM002829	78.9	5.2e-214	A5F9R5	Histidine--tRNA ligase	hisS	Flavobacterium johnsoniae (strain ATCC 17061 / DSM 2064 / UW101)	https://www.uniprot.org/uniprot/A5F9R5
AH-01_GM002831	64.6	1.1e-100	A6H162	Release factor glutamine methyltransferase	prmC	Flavobacterium psychrophilum (strain JIP02/86 / ATCC 49511)	https://www.uniprot.org/uniprot/A6H162
AH-01_GM002832	42	8.3e-31	Q08021	Uncharacterized N-acetyltransferase YjgM	yjgM	Salmonella typhimurium (strain LT2 / SGSC1412 / ATCC 700720)	https://www.uniprot.org/uniprot/Q08021
AH-01_GM002833	46.8	1.2e-47	P50853	Riboflavin biosynthesis protein RibD	ribD	Actinobacillus pleuropneumoniae	https://www.uniprot.org/uniprot/P50853
AH-01_GM002836	42.1	1.7e-21	Q45061	Putative acyl-CoA thioesterase YneP	yneP	Bacillus subtilis (strain 168)	https://www.uniprot.org/uniprot/Q45061
AH-01_GM002837	91.6	6.2e-255	A6GYW8	Chromosomal replication initiator protein DnaA	dnaA	Flavobacterium psychrophilum (strain JIP02/86 / ATCC 49511)	https://www.uniprot.org/uniprot/A6GYW8
AH-01_GM002838	43.7	6.5e-28	Q55535	Putative low molecular weight protein-tyrosine-phosphatase slr0328	slr0328	Synechocystis sp. (strain PCC 6803 / Kazusa)	https://www.uniprot.org/uniprot/Q55535
AH-01_GM002844	65.6	4.6e-95	A6GYX5	Diaminopimelate epimerase	dapF	Flavobacterium psychrophilum (strain JIP02/86 / ATCC 49511)	https://www.uniprot.org/uniprot/A6GYX5
AH-01_GM002845	44.2	5.2e-57	O05942	Probable periplasmic serine endoprotease DegP-like	htrA	Rickettsia prowazekii (strain Madrid E)	https://www.uniprot.org/uniprot/O05942
AH-01_GM002846	47.7	1.9e-110	Q02PG5	Glyceraldehyde-3-phosphate dehydrogenase-like protein	gap2	Pseudomonas aeruginosa (strain UCBPP-PA14)	https://www.uniprot.org/uniprot/Q02PG5
AH-01_GM002857	43.3	2.4e-61	P94474	Uncharacterized protein YeaC	yeaC	Bacillus subtilis (strain 168)	https://www.uniprot.org/uniprot/P94474
AH-01_GM002869	52.3	8.9e-154	Q3A709	Peptide chain release factor 3	prfC	Pelobacter carbinolicus (strain DSM 2380 / NBRC 103641 / GraBd1)	https://www.uniprot.org/uniprot/Q3A709
AH-01_GM002872	90.8	0	A5FIJ4	DNA-directed RNA polymerase subunit beta'	rpoC	Flavobacterium johnsoniae (strain ATCC 17061 / DSM 2064 / UW101)	https://www.uniprot.org/uniprot/A5FIJ4
AH-01_GM002873	93.5	0	A6GYU0	DNA-directed RNA polymerase subunit beta	rpoB	Flavobacterium psychrophilum (strain JIP02/86 / ATCC 49511)	https://www.uniprot.org/uniprot/A6GYU0
AH-01_GM002874	87.7	1e-49	A6GYU1	50S ribosomal protein L7/L12	rplL	Flavobacterium psychrophilum (strain JIP02/86 / ATCC 49511)	https://www.uniprot.org/uniprot/A6GYU1
AH-01_GM002875	79.8	2.8e-69	A6GYU2	50S ribosomal protein L10	rplJ	Flavobacterium psychrophilum (strain JIP02/86 / ATCC 49511)	https://www.uniprot.org/uniprot/A6GYU2
AH-01_GM002876	89.5	4.3e-113	A6GYU3	50S ribosomal protein L1	rplA	Flavobacterium psychrophilum (strain JIP02/86 / ATCC 49511)	https://www.uniprot.org/uniprot/A6GYU3
AH-01_GM002877	91	5.3e-72	A5FIK2	50S ribosomal protein L11	rplK	Flavobacterium johnsoniae (strain ATCC 17061 / DSM 2064 / UW101)	https://www.uniprot.org/uniprot/A5FIK2
AH-01_GM002878	44.1	6.9e-37	P65591	Transcription termination/antitermination protein NusG	nusG	Neisseria meningitidis serogroup A / serotype 4A (strain Z2491)	https://www.uniprot.org/uniprot/P65591
AH-01_GM002880	96.2	3.1e-220	A5FIJ9	Elongation factor Tu	tuf	Flavobacterium johnsoniae (strain ATCC 17061 / DSM 2064 / UW101)	https://www.uniprot.org/uniprot/A5FIJ9
AH-01_GM002883	79.7	5.4e-22	A6GYV0	30S ribosomal protein S21	rpsU	Flavobacterium psychrophilum (strain JIP02/86 / ATCC 49511)	https://www.uniprot.org/uniprot/A6GYV0
AH-01_GM002889	42.6	7e-91	P9WP50	Putative cystathionine beta-synthase MT1108	cbs	Mycobacterium tuberculosis (strain CDC 1551 / Oshkosh)	https://www.uniprot.org/uniprot/P9WP50
AH-01_GM002893	69.3	7.6e-83	A5FIL7	Ribonuclease HII	rnhB	Flavobacterium johnsoniae (strain ATCC 17061 / DSM 2064 / UW101)	https://www.uniprot.org/uniprot/A5FIL7
AH-01_GM002894	77.6	1.9e-101	A6GYW1	Octanoyltransferase	lipB	Flavobacterium psychrophilum (strain JIP02/86 / ATCC 49511)	https://www.uniprot.org/uniprot/A6GYW1
AH-01_GM002896	75	1.2e-246	A0M5H8	Lysine--tRNA ligase	lysS	Gramella forsetii (strain KT0803)	https://www.uniprot.org/uniprot/A0M5H8
AH-01_GM002900	47.1	3e-41	P21226	Endochitinase A2	CHI2	Pisum sativum	https://www.uniprot.org/uniprot/P21226
AH-01_GM002917	83.2	7.1e-210	A6GYW4	Glutamate-1-semialdehyde 2,1-aminomutase	hemL	Flavobacterium psychrophilum (strain JIP02/86 / ATCC 49511)	https://www.uniprot.org/uniprot/A6GYW4
AH-01_GM002918	40.1	2.1e-14	O32083	Exo-glucosaminidase LytG	lytG	Bacillus subtilis (strain 168)	https://www.uniprot.org/uniprot/O32083
AH-01_GM002923	61.1	2.9e-226	Q86AX3	Probable urocanate hydratase	uroc1	Dictyostelium discoideum	https://www.uniprot.org/uniprot/Q86AX3
AH-01_GM002929	69.6	9.7e-141	C7LJY3	Transcription termination factor Rho	rho	Sulcia muelleri (strain SMDSEM)	https://www.uniprot.org/uniprot/C7LJY3
AH-01_GM002937	57.4	1.4e-87	B3ETC6	GTPase Era	era	Amoebophilus asiaticus (strain 5a2)	https://www.uniprot.org/uniprot/B3ETC6
AH-01_GM002941	83.4	4.8e-214	A5FIR0	GTPase Der	der	Flavobacterium johnsoniae (strain ATCC 17061 / DSM 2064 / UW101)	https://www.uniprot.org/uniprot/A5FIR0
AH-01_GM002944	65.3	2.8e-144	A6LDN1	2-isopropylmalate synthase	leuA	Parabacteroides distasonis (strain ATCC 8503 / DSM 20701 / CIP 104284 / JCM 5825 / NCTC 11152)	https://www.uniprot.org/uniprot/A6LDN1
AH-01_GM002945	65.2	4.5e-178	Q11NN8	3-isopropylmalate dehydratase large subunit	leuC	Cytophaga hutchinsonii (strain ATCC 33406 / NCIMB 9469)	https://www.uniprot.org/uniprot/Q11NN8
AH-01_GM002946	61.9	2.3e-65	A0M367	3-isopropylmalate dehydratase small subunit	leuD	Gramella forsetii (strain KT0803)	https://www.uniprot.org/uniprot/A0M367
AH-01_GM002947	54.8	1.1e-105	Q8A6M0	3-isopropylmalate dehydrogenase	leuB	Bacteroides thetaiotaomicron (strain ATCC 29148 / DSM 2079 / NCTC 10582 / E50 / VPI-5482)	https://www.uniprot.org/uniprot/Q8A6M0
AH-01_GM002949	66.8	3.4e-135	D2QN44	4-hydroxyproline 2-epimerase	Slin_1478	Spirosoma linguale (strain ATCC 33905 / DSM 74 / LMG 10896)	https://www.uniprot.org/uniprot/D2QN44
AH-01_GM002950	44.8	8.7e-125	Q6FFQ0	Alpha-ketoglutaric semialdehyde dehydrogenase	ACIAD0131	Acinetobacter baylyi (strain ATCC 33305 / BD413 / ADP1)	https://www.uniprot.org/uniprot/Q6FFQ0
AH-01_GM002954	56.5	1.8e-138	Q9KC63	L-threonine dehydratase biosynthetic IlvA	ilvA	Bacillus halodurans (strain ATCC BAA-125 / DSM 18197 / FERM 7344 / JCM 9153 / C-125)	https://www.uniprot.org/uniprot/Q9KC63
AH-01_GM002955	72.3	4.6e-208	Q11VZ3	Ketol-acid reductoisomerase (NADP(+))	ilvC	Cytophaga hutchinsonii (strain ATCC 33406 / NCIMB 9469)	https://www.uniprot.org/uniprot/Q11VZ3
AH-01_GM002957	47.1	4.1e-144	P37251	Acetolactate synthase large subunit	ilvB	Bacillus subtilis (strain 168)	https://www.uniprot.org/uniprot/P37251
AH-01_GM002958	67.9	3.1e-221	A6GWT7	Dihydroxy-acid dehydratase	ilvD	Flavobacterium psychrophilum (strain JIP02/86 / ATCC 49511)	https://www.uniprot.org/uniprot/A6GWT7
AH-01_GM002959	40.1	3.3e-52	O86428	Branched-chain-amino-acid aminotransferase	ilvE	Pseudomonas aeruginosa (strain ATCC 15692 / DSM 22644 / CIP 104116 / JCM 14847 / LMG 12228 / 1C / PRS 101 / PAO1)	https://www.uniprot.org/uniprot/O86428
AH-01_GM002967	77.9	0	A6H0Y3	Alanine--tRNA ligase	alaS	Flavobacterium psychrophilum (strain JIP02/86 / ATCC 49511)	https://www.uniprot.org/uniprot/A6H0Y3
AH-01_GM002979	40	5.4e-98	P08461	Dihydrolipoyllysine-residue acetyltransferase component of pyruvate dehydrogenase complex, mitochondrial	Dlat	Rattus norvegicus	https://www.uniprot.org/uniprot/P08461
AH-01_GM002980	48.3	2.1e-84	Q1RJX4	Pyruvate dehydrogenase E1 component subunit alpha	pdhA	Rickettsia bellii (strain RML369-C)	https://www.uniprot.org/uniprot/Q1RJX4
AH-01_GM002981	42.7	3.1e-15	Q9KD53	Cytidine deaminase	cdd	Bacillus halodurans (strain ATCC BAA-125 / DSM 18197 / FERM 7344 / JCM 9153 / C-125)	https://www.uniprot.org/uniprot/Q9KD53

## Sheet: GX-01
Gene_id	Identity	E_value	Subject_id	Protein_id	Swissprot_Gene	Organism	url
GX-01_GM000001	91.6	8e-255	A6GYW8	Chromosomal replication initiator protein DnaA	dnaA	Flavobacterium psychrophilum (strain JIP02/86 / ATCC 49511)	https://www.uniprot.org/uniprot/A6GYW8
GX-01_GM000002	40.3	2.1e-26	Q55535	Putative low molecular weight protein-tyrosine-phosphatase slr0328	slr0328	Synechocystis sp. (strain PCC 6803 / Kazusa)	https://www.uniprot.org/uniprot/Q55535
GX-01_GM000008	64.8	3.2e-96	A6GYX5	Diaminopimelate epimerase	dapF	Flavobacterium psychrophilum (strain JIP02/86 / ATCC 49511)	https://www.uniprot.org/uniprot/A6GYX5
GX-01_GM000009	40.7	2e-69	P39099	Periplasmic pH-dependent serine endoprotease DegQ	degQ	Escherichia coli (strain K12)	https://www.uniprot.org/uniprot/P39099
GX-01_GM000010	48.9	1e-111	Q02PG5	Glyceraldehyde-3-phosphate dehydrogenase-like protein	gap2	Pseudomonas aeruginosa (strain UCBPP-PA14)	https://www.uniprot.org/uniprot/Q02PG5
GX-01_GM000020	42.3	2.6e-60	P94474	Uncharacterized protein YeaC	yeaC	Bacillus subtilis (strain 168)	https://www.uniprot.org/uniprot/P94474
GX-01_GM000031	52.7	5.2e-154	Q3A709	Peptide chain release factor 3	prfC	Pelobacter carbinolicus (strain DSM 2380 / NBRC 103641 / GraBd1)	https://www.uniprot.org/uniprot/Q3A709
GX-01_GM000033	90.7	0	A5FIJ4	DNA-directed RNA polymerase subunit beta'	rpoC	Flavobacterium johnsoniae (strain ATCC 17061 / DSM 2064 / UW101)	https://www.uniprot.org/uniprot/A5FIJ4
GX-01_GM000034	93.9	0	A6GYU0	DNA-directed RNA polymerase subunit beta	rpoB	Flavobacterium psychrophilum (strain JIP02/86 / ATCC 49511)	https://www.uniprot.org/uniprot/A6GYU0
GX-01_GM000035	89.3	1e-52	A6GYU1	50S ribosomal protein L7/L12	rplL	Flavobacterium psychrophilum (strain JIP02/86 / ATCC 49511)	https://www.uniprot.org/uniprot/A6GYU1
GX-01_GM000036	80.4	8.1e-69	A6GYU2	50S ribosomal protein L10	rplJ	Flavobacterium psychrophilum (strain JIP02/86 / ATCC 49511)	https://www.uniprot.org/uniprot/A6GYU2
GX-01_GM000037	89.5	2.5e-113	A6GYU3	50S ribosomal protein L1	rplA	Flavobacterium psychrophilum (strain JIP02/86 / ATCC 49511)	https://www.uniprot.org/uniprot/A6GYU3
GX-01_GM000038	91	5.5e-72	A5FIK2	50S ribosomal protein L11	rplK	Flavobacterium johnsoniae (strain ATCC 17061 / DSM 2064 / UW101)	https://www.uniprot.org/uniprot/A5FIK2
GX-01_GM000039	44.1	6.9e-37	P65591	Transcription termination/antitermination protein NusG	nusG	Neisseria meningitidis serogroup A / serotype 4A (strain Z2491)	https://www.uniprot.org/uniprot/P65591
GX-01_GM000041	96.2	3.1e-220	A5FIJ9	Elongation factor Tu	tuf	Flavobacterium johnsoniae (strain ATCC 17061 / DSM 2064 / UW101)	https://www.uniprot.org/uniprot/A5FIJ9
GX-01_GM000044	79.7	5.4e-22	A6GYV0	30S ribosomal protein S21	rpsU	Flavobacterium psychrophilum (strain JIP02/86 / ATCC 49511)	https://www.uniprot.org/uniprot/A6GYV0
GX-01_GM000050	42.6	4.6e-90	P9WP50	Putative cystathionine beta-synthase MT1108	cbs	Mycobacterium tuberculosis (strain CDC 1551 / Oshkosh)	https://www.uniprot.org/uniprot/P9WP50
GX-01_GM000054	70.2	1.1e-81	A5FIL7	Ribonuclease HII	rnhB	Flavobacterium johnsoniae (strain ATCC 17061 / DSM 2064 / UW101)	https://www.uniprot.org/uniprot/A5FIL7
GX-01_GM000055	81	2.3e-106	A6GYW1	Octanoyltransferase	lipB	Flavobacterium psychrophilum (strain JIP02/86 / ATCC 49511)	https://www.uniprot.org/uniprot/A6GYW1
GX-01_GM000059	74.3	4.7e-246	A0M5H8	Lysine--tRNA ligase	lysS	Gramella forsetii (strain KT0803)	https://www.uniprot.org/uniprot/A0M5H8
GX-01_GM000060	45.4	2.8e-41	P21226	Endochitinase A2	CHI2	Pisum sativum	https://www.uniprot.org/uniprot/P21226
GX-01_GM000077	82.5	2.3e-208	A6GYW4	Glutamate-1-semialdehyde 2,1-aminomutase	hemL	Flavobacterium psychrophilum (strain JIP02/86 / ATCC 49511)	https://www.uniprot.org/uniprot/A6GYW4
GX-01_GM000083	61.4	2e-227	Q86AX3	Probable urocanate hydratase	uroc1	Dictyostelium discoideum	https://www.uniprot.org/uniprot/Q86AX3
GX-01_GM000087	43.8	3.3e-08	P54510	Uncharacterized protein YqhL	yqhL	Bacillus subtilis (strain 168)	https://www.uniprot.org/uniprot/P54510
GX-01_GM000089	69.8	4.4e-141	C7LJY3	Transcription termination factor Rho	rho	Sulcia muelleri (strain SMDSEM)	https://www.uniprot.org/uniprot/C7LJY3
GX-01_GM000097	56.7	8.9e-87	B3ETC6	GTPase Era	era	Amoebophilus asiaticus (strain 5a2)	https://www.uniprot.org/uniprot/B3ETC6
GX-01_GM000104	84.9	2.2e-214	A6H103	GTPase Der	der	Flavobacterium psychrophilum (strain JIP02/86 / ATCC 49511)	https://www.uniprot.org/uniprot/A6H103
GX-01_GM000107	63.9	2.9e-141	A6LDN1	2-isopropylmalate synthase	leuA	Parabacteroides distasonis (strain ATCC 8503 / DSM 20701 / CIP 104284 / JCM 5825 / NCTC 11152)	https://www.uniprot.org/uniprot/A6LDN1
GX-01_GM000108	64.9	2e-178	Q11NN8	3-isopropylmalate dehydratase large subunit	leuC	Cytophaga hutchinsonii (strain ATCC 33406 / NCIMB 9469)	https://www.uniprot.org/uniprot/Q11NN8
GX-01_GM000109	60.3	2.3e-65	A0M367	3-isopropylmalate dehydratase small subunit	leuD	Gramella forsetii (strain KT0803)	https://www.uniprot.org/uniprot/A0M367
GX-01_GM000110	54	2.7e-104	Q8A6M0	3-isopropylmalate dehydrogenase	leuB	Bacteroides thetaiotaomicron (strain ATCC 29148 / DSM 2079 / NCTC 10582 / E50 / VPI-5482)	https://www.uniprot.org/uniprot/Q8A6M0
GX-01_GM000116	76.9	0	A6H0Y3	Alanine--tRNA ligase	alaS	Flavobacterium psychrophilum (strain JIP02/86 / ATCC 49511)	https://www.uniprot.org/uniprot/A6H0Y3
GX-01_GM000127	40.9	2.6e-84	Q92HK7	Dihydrolipoyllysine-residue acetyltransferase component of pyruvate dehydrogenase complex	pdhC	Rickettsia conorii (strain ATCC VR-613 / Malish 7)	https://www.uniprot.org/uniprot/Q92HK7
GX-01_GM000128	48.3	1.2e-84	Q1RJX4	Pyruvate dehydrogenase E1 component subunit alpha	pdhA	Rickettsia bellii (strain RML369-C)	https://www.uniprot.org/uniprot/Q1RJX4
GX-01_GM000129	40.7	8.6e-16	P19079	Cytidine deaminase	cdd	Bacillus subtilis (strain 168)	https://www.uniprot.org/uniprot/P19079
GX-01_GM000169	60.1	1.3e-119	Q7VMI2	Ribosome-binding ATPase YchF	ychF	Haemophilus ducreyi (strain 35000HP / ATCC 700724)	https://www.uniprot.org/uniprot/Q7VMI2
GX-01_GM000175	41.9	2.8e-70	P40407	Uncharacterized protein YbbC	ybbC	Bacillus subtilis (strain 168)	https://www.uniprot.org/uniprot/P40407
GX-01_GM000180	79.5	5.6e-99	A6H1N2	7-carboxy-7-deazaguanine synthase	queE	Flavobacterium psychrophilum (strain JIP02/86 / ATCC 49511)	https://www.uniprot.org/uniprot/A6H1N2
GX-01_GM000188	44.1	1.8e-100	P39342	Uncharacterized protein YjgR	yjgR	Escherichia coli (strain K12)	https://www.uniprot.org/uniprot/P39342
GX-01_GM000191	74.3	3.2e-200	A5FMP6	Kynurenine 3-monooxygenase	kmo	Flavobacterium johnsoniae (strain ATCC 17061 / DSM 2064 / UW101)	https://www.uniprot.org/uniprot/A5FMP6
GX-01_GM000195	82.1	6.8e-213	A6H1P7	Kynureninase	kynU	Flavobacterium psychrophilum (strain JIP02/86 / ATCC 49511)	https://www.uniprot.org/uniprot/A6H1P7
GX-01_GM000196	44.6	1.2e-54	P38446	Nuclease	nucA	Nostoc sp. (strain PCC 7120 / SAG 25.82 / UTEX 2576)	https://www.uniprot.org/uniprot/P38446
GX-01_GM000197	84.5	1.1e-176	A5FMM5	S-adenosylmethionine:tRNA ribosyltransferase-isomerase	queA	Flavobacterium johnsoniae (strain ATCC 17061 / DSM 2064 / UW101)	https://www.uniprot.org/uniprot/A5FMM5
GX-01_GM000206	45	7.8e-81	Q64YD8	3-phosphoshikimate 1-carboxyvinyltransferase	aroA	Bacteroides fragilis (strain YCH46)	https://www.uniprot.org/uniprot/Q64YD8
GX-01_GM000207	42.5	6.1e-17	P42979	Uncharacterized protein YpjD	ypjD	Bacillus subtilis (strain 168)	https://www.uniprot.org/uniprot/P42979
GX-01_GM000208	75.3	8.9e-59	A6GW89	D-aminoacyl-tRNA deacylase	dtd	Flavobacterium psychrophilum (strain JIP02/86 / ATCC 49511)	https://www.uniprot.org/uniprot/A6GW89
GX-01_GM000209	75.5	1.1e-143	A6GW90	Small ribosomal subunit biogenesis GTPase RsgA	rsgA	Flavobacterium psychrophilum (strain JIP02/86 / ATCC 49511)	https://www.uniprot.org/uniprot/A6GW90
GX-01_GM000213	83.9	6.4e-169	A6H1B8	Probable dual-specificity RNA methyltransferase RlmN	rlmN	Flavobacterium psychrophilum (strain JIP02/86 / ATCC 49511)	https://www.uniprot.org/uniprot/A6H1B8
GX-01_GM000217	45.6	2e-10	Q3APS6	Sec-independent protein translocase protein TatA	tatA	Chlorobium chlorochromatii (strain CaD3)	https://www.uniprot.org/uniprot/Q3APS6
GX-01_GM000223	47.6	2.5e-55	Q93RZ5	Peptidase E	pepE	Streptomyces coelicolor (strain ATCC BAA-471 / A3(2) / M145)	https://www.uniprot.org/uniprot/Q93RZ5
GX-01_GM000227	74.5	4.1e-225	A5FJ26	2,3-bisphosphoglycerate-independent phosphoglycerate mutase	gpmI	Flavobacterium johnsoniae (strain ATCC 17061 / DSM 2064 / UW101)	https://www.uniprot.org/uniprot/A5FJ26
GX-01_GM000228	52	9.5e-93	P55180	UDP-glucose 4-epimerase	galE	Bacillus subtilis (strain 168)	https://www.uniprot.org/uniprot/P55180
GX-01_GM000229	44.6	1.2e-83	P15263	Pleiotropic regulatory protein	degT	Geobacillus stearothermophilus	https://www.uniprot.org/uniprot/P15263
GX-01_GM000234	67.6	5.2e-298	A6GWM2	Asp/Glu-specific dipeptidyl-peptidase	dpp11	Flavobacterium psychrophilum (strain JIP02/86 / ATCC 49511)	https://www.uniprot.org/uniprot/A6GWM2
GX-01_GM000243	43.2	1.3e-203	P00582	DNA polymerase I	polA	Escherichia coli (strain K12)	https://www.uniprot.org/uniprot/P00582
GX-01_GM000244	60.1	4.1e-43	Q14KZ8	50S ribosomal protein L13	rplM	Spiroplasma citri	https://www.uniprot.org/uniprot/Q14KZ8
GX-01_GM000245	88.3	4.8e-61	A6GWU3	30S ribosomal protein S9	rpsI	Flavobacterium psychrophilum (strain JIP02/86 / ATCC 49511)	https://www.uniprot.org/uniprot/A6GWU3
GX-01_GM000246	90.6	1.4e-125	A5FJG9	30S ribosomal protein S2	rpsB	Flavobacterium johnsoniae (strain ATCC 17061 / DSM 2064 / UW101)	https://www.uniprot.org/uniprot/A5FJG9
GX-01_GM000247	81.8	5.5e-123	A6GWU1	Elongation factor Ts	tsf	Flavobacterium psychrophilum (strain JIP02/86 / ATCC 49511)	https://www.uniprot.org/uniprot/A6GWU1
GX-01_GM000257	85.6	1.8e-85	A6GWS4	Ribosome-recycling factor	frr	Flavobacterium psychrophilum (strain JIP02/86 / ATCC 49511)	https://www.uniprot.org/uniprot/A6GWS4
GX-01_GM000258	92.8	4.4e-121	A6GWS3	Uridylate kinase	pyrH	Flavobacterium psychrophilum (strain JIP02/86 / ATCC 49511)	https://www.uniprot.org/uniprot/A6GWS3
GX-01_GM000267	42.9	5.3e-129	P76104	Uncharacterized protease YdcP	ydcP	Escherichia coli (strain K12)	https://www.uniprot.org/uniprot/P76104
GX-01_GM000269	45.9	7.2e-65	P71019	Malonyl CoA-acyl carrier protein transacylase	fabD	Bacillus subtilis (strain 168)	https://www.uniprot.org/uniprot/P71019
GX-01_GM000278	43	2.3e-44	P94389	Uncharacterized protein YcgL	ycgL	Bacillus subtilis (strain 168)	https://www.uniprot.org/uniprot/P94389
GX-01_GM000306	47.7	3.4e-97	Q02635	Aspartate aminotransferase A	aatA	Rhizobium meliloti (strain 1021)	https://www.uniprot.org/uniprot/Q02635
GX-01_GM000308	72.8	4.2e-83	A6GWQ2	Ribosomal RNA small subunit methyltransferase G	rsmG	Flavobacterium psychrophilum (strain JIP02/86 / ATCC 49511)	https://www.uniprot.org/uniprot/A6GWQ2
GX-01_GM000312	61.1	4.9e-167	Q11Q97	Asparagine--tRNA ligase	asnS	Cytophaga hutchinsonii (strain ATCC 33406 / NCIMB 9469)	https://www.uniprot.org/uniprot/Q11Q97
GX-01_GM000314	43.9	1.4e-91	P72973	Na(+)/H(+) antiporter NhaS4	nhaS4	Synechocystis sp. (strain PCC 6803 / Kazusa)	https://www.uniprot.org/uniprot/P72973
GX-01_GM000320	48.4	1.3e-157	O32219	Cadmium, zinc and cobalt-transporting ATPase	cadA	Bacillus subtilis (strain 168)	https://www.uniprot.org/uniprot/O32219
GX-01_GM000322	47.8	2.2e-271	P94177	Cation efflux system protein CzcA	czcA	Alcaligenes sp. (strain CT14)	https://www.uniprot.org/uniprot/P94177
GX-01_GM000324	44.7	4.1e-101	P38942	4-hydroxybutyrate coenzyme A transferase	cat2	Clostridium kluyveri (strain ATCC 8527 / DSM 555 / NCIMB 10680)	https://www.uniprot.org/uniprot/P38942
GX-01_GM000325	52.4	2.9e-71	P69000	Methionine aminopeptidase	map	Clostridium acetobutylicum (strain ATCC 824 / DSM 792 / JCM 1419 / LMG 5710 / VKM B-1787)	https://www.uniprot.org/uniprot/P69000
GX-01_GM000329	42.6	1.8e-20	B2III9	Protein ApaG	apaG	Beijerinckia indica subsp. indica (strain ATCC 9039 / DSM 1715 / NCIB 8712)	https://www.uniprot.org/uniprot/B2III9
GX-01_GM000330	52	2e-161	Q54RA2	Delta-1-pyrroline-5-carboxylate dehydrogenase, mitochondrial	DDB_G0283293	Dictyostelium discoideum	https://www.uniprot.org/uniprot/Q54RA2
GX-01_GM000342	68.8	3.5e-225	A6GWT7	Dihydroxy-acid dehydratase	ilvD	Flavobacterium psychrophilum (strain JIP02/86 / ATCC 49511)	https://www.uniprot.org/uniprot/A6GWT7
GX-01_GM000343	47.4	5.4e-144	P37251	Acetolactate synthase large subunit	ilvB	Bacillus subtilis (strain 168)	https://www.uniprot.org/uniprot/P37251
GX-01_GM000345	74.3	9.3e-212	Q11VZ3	Ketol-acid reductoisomerase (NADP(+))	ilvC	Cytophaga hutchinsonii (strain ATCC 33406 / NCIMB 9469)	https://www.uniprot.org/uniprot/Q11VZ3
GX-01_GM000346	56	1.8e-138	Q9KC63	L-threonine dehydratase biosynthetic IlvA	ilvA	Bacillus halodurans (strain ATCC BAA-125 / DSM 18197 / FERM 7344 / JCM 9153 / C-125)	https://www.uniprot.org/uniprot/Q9KC63
GX-01_GM000350	45.3	3.3e-124	Q6FFQ0	Alpha-ketoglutaric semialdehyde dehydrogenase	ACIAD0131	Acinetobacter baylyi (strain ATCC 33305 / BD413 / ADP1)	https://www.uniprot.org/uniprot/Q6FFQ0
GX-01_GM000351	66.3	3.2e-133	D2QN44	4-hydroxyproline 2-epimerase	Slin_1478	Spirosoma linguale (strain ATCC 33905 / DSM 74 / LMG 10896)	https://www.uniprot.org/uniprot/D2QN44
GX-01_GM000359	45.8	2.2e-161	P98000	Alternative cytochrome c oxidase subunit 1	coxN	Bradyrhizobium diazoefficiens (strain JCM 10833 / IAM 13628 / NBRC 14792 / USDA 110)	https://www.uniprot.org/uniprot/P98000
GX-01_GM000368	67.5	6.7e-182	A6H1Q0	NADH-quinone oxidoreductase subunit N	nuoN	Flavobacterium psychrophilum (strain JIP02/86 / ATCC 49511)	https://www.uniprot.org/uniprot/A6H1Q0
GX-01_GM000370	44.3	4.9e-127	Q56227	NADH-quinone oxidoreductase subunit 12	nqo12	Thermus thermophilus (strain HB8 / ATCC 27634 / DSM 579)	https://www.uniprot.org/uniprot/Q56227
GX-01_GM000371	87.7	5.2e-45	A5FKJ7	NADH-quinone oxidoreductase subunit K	nuoK	Flavobacterium johnsoniae (strain ATCC 17061 / DSM 2064 / UW101)	https://www.uniprot.org/uniprot/A5FKJ7
GX-01_GM000373	78.3	5.1e-77	A6H1Q5	NADH-quinone oxidoreductase subunit I	nuoI	Flavobacterium psychrophilum (strain JIP02/86 / ATCC 49511)	https://www.uniprot.org/uniprot/A6H1Q5
GX-01_GM000375	72.1	3.9e-150	A6H1Q6	NADH-quinone oxidoreductase subunit H	nuoH	Flavobacterium psychrophilum (strain JIP02/86 / ATCC 49511)	https://www.uniprot.org/uniprot/A6H1Q6
GX-01_GM000376	41	3e-54	Q1RKD2	NADH-quinone oxidoreductase subunit G	nuoG	Rickettsia bellii (strain RML369-C)	https://www.uniprot.org/uniprot/Q1RKD2
GX-01_GM000377	50	1.4e-123	P56913	NADH-quinone oxidoreductase subunit F 2	nuoF2	Rhizobium meliloti (strain 1021)	https://www.uniprot.org/uniprot/P56913
GX-01_GM000378	44.7	1.8e-37	P04394	NADH dehydrogenase [ubiquinone] flavoprotein 2, mitochondrial	NDUFV2	Bos taurus	https://www.uniprot.org/uniprot/P04394
GX-01_GM000379	82	2.3e-205	A5FKI7	NADH-quinone oxidoreductase subunit D	nuoD	Flavobacterium johnsoniae (strain ATCC 17061 / DSM 2064 / UW101)	https://www.uniprot.org/uniprot/A5FKI7
GX-01_GM000380	44.6	9.1e-31	B3PY58	NADH-quinone oxidoreductase subunit C 2	nuoC2	Rhizobium etli (strain CIAT 652)	https://www.uniprot.org/uniprot/B3PY58
GX-01_GM000381	87.4	2.5e-87	A5FKI9	NADH-quinone oxidoreductase subunit B	nuoB	Flavobacterium johnsoniae (strain ATCC 17061 / DSM 2064 / UW101)	https://www.uniprot.org/uniprot/A5FKI9
GX-01_GM000382	77.7	6.1e-50	A6H1R4	NADH-quinone oxidoreductase subunit A	nuoA	Flavobacterium psychrophilum (strain JIP02/86 / ATCC 49511)	https://www.uniprot.org/uniprot/A6H1R4
GX-01_GM000384	40.2	6e-14	P68573	SPBc2 prophage-derived DNA-binding protein HU 2	hup2	Bacillus subtilis (strain 168)	https://www.uniprot.org/uniprot/P68573
GX-01_GM000385	41.8	1.7e-44	Q99P21	Adenine DNA glycosylase	Mutyh	Mus musculus	https://www.uniprot.org/uniprot/Q99P21
GX-01_GM000386	43.6	2.4e-21	Q8A7M7	Single-stranded DNA-binding protein	ssb	Bacteroides thetaiotaomicron (strain ATCC 29148 / DSM 2079 / NCTC 10582 / E50 / VPI-5482)	https://www.uniprot.org/uniprot/Q8A7M7
GX-01_GM000394	87.2	6.5e-38	A5FJP6	50S ribosomal protein L27	rpmA	Flavobacterium johnsoniae (strain ATCC 17061 / DSM 2064 / UW101)	https://www.uniprot.org/uniprot/A5FJP6
GX-01_GM000395	82.3	2.7e-57	A5FJP5	50S ribosomal protein L21	rplU	Flavobacterium johnsoniae (strain ATCC 17061 / DSM 2064 / UW101)	https://www.uniprot.org/uniprot/A5FJP5
GX-01_GM000398	41	7.9e-47	P37545	Uncharacterized metal-dependent hydrolase YabD	yabD	Bacillus subtilis (strain 168)	https://www.uniprot.org/uniprot/P37545
GX-01_GM000400	41.6	2.7e-66	P0A963	L-asparaginase 1	ansA	Escherichia coli O157:H7	https://www.uniprot.org/uniprot/P0A963
GX-01_GM000402	63	1.6e-78	A5FJK8	Geranylgeranylglyceryl phosphate synthase	Fjoh_1584	Flavobacterium johnsoniae (strain ATCC 17061 / DSM 2064 / UW101)	https://www.uniprot.org/uniprot/A5FJK8
GX-01_GM000404	87.9	7.7e-228	A5FJK3	Adenosylhomocysteinase	ahcY	Flavobacterium johnsoniae (strain ATCC 17061 / DSM 2064 / UW101)	https://www.uniprot.org/uniprot/A5FJK3
GX-01_GM000407	46.6	2.6e-147	B2RIT0	Dipeptidyl-peptidase 5	dpp5	Porphyromonas gingivalis (strain ATCC 33277 / DSM 20709 / CIP 103683 / JCM 12257 / NCTC 11834 / 2561)	https://www.uniprot.org/uniprot/B2RIT0
GX-01_GM000409	77.7	4.4e-199	A5FMI1	Tyrosine--tRNA ligase	tyrS	Flavobacterium johnsoniae (strain ATCC 17061 / DSM 2064 / UW101)	https://www.uniprot.org/uniprot/A5FMI1
GX-01_GM000413	46.1	2.5e-50	A0QZ12	Polyprenol monophosphomannose synthase	ppm1	Mycobacterium smegmatis (strain ATCC 700084 / mc(2)155)	https://www.uniprot.org/uniprot/A0QZ12
GX-01_GM000417	60.4	1.5e-216	Q8AAB1	Glutamine--fructose-6-phosphate aminotransferase [isomerizing]	glmS	Bacteroides thetaiotaomicron (strain ATCC 29148 / DSM 2079 / NCTC 10582 / E50 / VPI-5482)	https://www.uniprot.org/uniprot/Q8AAB1
GX-01_GM000420	66.7	1.1e-105	A6GVV3	Pantothenate synthetase	panC	Flavobacterium psychrophilum (strain JIP02/86 / ATCC 49511)	https://www.uniprot.org/uniprot/A6GVV3
GX-01_GM000421	78.4	1.4e-46	A6GVV2	Aspartate 1-decarboxylase	panD	Flavobacterium psychrophilum (strain JIP02/86 / ATCC 49511)	https://www.uniprot.org/uniprot/A6GVV2
GX-01_GM000424	50.8	2.8e-124	P37572	DNA repair protein RadA	radA	Bacillus subtilis (strain 168)	https://www.uniprot.org/uniprot/P37572
GX-01_GM000428	49.7	1.1e-91	P0A9T4	Protein tas	tas	Escherichia coli (strain K12)	https://www.uniprot.org/uniprot/P0A9T4
GX-01_GM000430	43	1.2e-52	P37454	Exodeoxyribonuclease	exoA	Bacillus subtilis (strain 168)	https://www.uniprot.org/uniprot/P37454
GX-01_GM000433	45.1	8.9e-15	Q4ULW1	Endolytic peptidoglycan transglycosylase RlpA	rlpA	Rickettsia felis (strain ATCC VR-1525 / URRWXCal2)	https://www.uniprot.org/uniprot/Q4ULW1
GX-01_GM000434	50.6	3.1e-33	A3DIJ8	Inorganic triphosphatase	Cthe_2577	Clostridium thermocellum (strain ATCC 27405 / DSM 1237 / NBRC 103400 / NCIMB 10682 / NRRL B-4536 / VPI 7372)	https://www.uniprot.org/uniprot/A3DIJ8
GX-01_GM000435	54.7	4.4e-96	Q8UJK7	DNA polymerase IV 2	dinB2	Agrobacterium fabrum (strain C58 / ATCC 33970)	https://www.uniprot.org/uniprot/Q8UJK7
GX-01_GM000436	43.1	7.9e-101	Q46078	Pyruvate kinase	pyk	Corynebacterium glutamicum (strain ATCC 13032 / DSM 20300 / JCM 1318 / LMG 3730 / NCIMB 10025)	https://www.uniprot.org/uniprot/Q46078
GX-01_GM000439	58.9	7.4e-64	A0M7A5	ATP-dependent dethiobiotin synthetase BioD	bioD	Gramella forsetii (strain KT0803)	https://www.uniprot.org/uniprot/A0M7A5
GX-01_GM000442	46.4	4.2e-18	P70949	Fe-S protein maturation auxiliary factor YitW	yitW	Bacillus subtilis (strain 168)	https://www.uniprot.org/uniprot/P70949
GX-01_GM000443	43.8	2.1e-22	Q52742	Uncharacterized SufE-like protein RHE_CH01250	RHE_CH01250	Rhizobium etli (strain CFN 42 / ATCC 51251)	https://www.uniprot.org/uniprot/Q52742
GX-01_GM000445	49.4	2.7e-118	O32164	Cysteine desulfurase SufS	sufS	Bacillus subtilis (strain 168)	https://www.uniprot.org/uniprot/O32164
GX-01_GM000458	43.9	6.8e-67	P94474	Uncharacterized protein YeaC	yeaC	Bacillus subtilis (strain 168)	https://www.uniprot.org/uniprot/P94474
GX-01_GM000460	73	4.7e-105	A6GW45	Ribonuclease 3	rnc	Flavobacterium psychrophilum (strain JIP02/86 / ATCC 49511)	https://www.uniprot.org/uniprot/A6GW45
GX-01_GM000461	52.6	1.4e-117	O34340	3-oxoacyl-[acyl-carrier-protein] synthase 2	fabF	Bacillus subtilis (strain 168)	https://www.uniprot.org/uniprot/O34340
GX-01_GM000462	98.7	2.1e-35	A5FKU7	Acyl carrier protein	acpP	Flavobacterium johnsoniae (strain ATCC 17061 / DSM 2064 / UW101)	https://www.uniprot.org/uniprot/A5FKU7
GX-01_GM000464	55.3	2.9e-39	A4J7B3	Ribonuclease H	rnhA	Desulfotomaculum reducens (strain MI-1)	https://www.uniprot.org/uniprot/A4J7B3
GX-01_GM000466	48.6	1e-41	B2RI39	Lipoprotein signal peptidase	lspA	Porphyromonas gingivalis (strain ATCC 33277 / DSM 20709 / CIP 103683 / JCM 12257 / NCTC 11834 / 2561)	https://www.uniprot.org/uniprot/B2RI39
GX-01_GM000468	61.8	0	Q5LCU8	Isoleucine--tRNA ligase	ileS	Bacteroides fragilis (strain ATCC 25285 / DSM 2151 / JCM 11019 / NCTC 9343)	https://www.uniprot.org/uniprot/Q5LCU8
GX-01_GM000471	57.4	7e-74	A5FM31	DNA repair protein RecO	recO	Flavobacterium johnsoniae (strain ATCC 17061 / DSM 2064 / UW101)	https://www.uniprot.org/uniprot/A5FM31
GX-01_GM000474	67.6	4.7e-172	P43793	NADP-specific glutamate dehydrogenase	gdhA	Haemophilus influenzae (strain ATCC 51907 / DSM 11121 / KW20 / Rd)	https://www.uniprot.org/uniprot/P43793
GX-01_GM000476	53	5.7e-110	Q83A83	Cystathionine beta-lyase	metC	Coxiella burnetii (strain RSA 493 / Nine Mile phase I)	https://www.uniprot.org/uniprot/Q83A83
GX-01_GM000478	51.4	2e-140	P46562	Putative aldehyde dehydrogenase family 7 member A1 homolog	alh-9	Caenorhabditis elegans	https://www.uniprot.org/uniprot/P46562
GX-01_GM000479	52.1	1.6e-46	Q4UT95	3-hydroxyanthranilate 3,4-dioxygenase	nbaC	Xanthomonas campestris pv. campestris (strain 8004)	https://www.uniprot.org/uniprot/Q4UT95
GX-01_GM000484	83.4	6.1e-198	A6H294	GTPase HflX	hflX	Flavobacterium psychrophilum (strain JIP02/86 / ATCC 49511)	https://www.uniprot.org/uniprot/A6H294
GX-01_GM000489	90.3	7.2e-181	A6GVW9	Phenylalanine--tRNA ligase alpha subunit	pheS	Flavobacterium psychrophilum (strain JIP02/86 / ATCC 49511)	https://www.uniprot.org/uniprot/A6GVW9
GX-01_GM000493	50.9	6.3e-104	Q46856	Alcohol dehydrogenase YqhD	yqhD	Escherichia coli (strain K12)	https://www.uniprot.org/uniprot/Q46856
GX-01_GM000496	42.4	1.4e-26	Q5UR67	N-glycosidase R617	MIMI_R617	Acanthamoeba polyphaga mimivirus	https://www.uniprot.org/uniprot/Q5UR67
GX-01_GM000501	76.2	9.6e-90	A6GVY8	Probable nicotinate-nucleotide adenylyltransferase	nadD	Flavobacterium psychrophilum (strain JIP02/86 / ATCC 49511)	https://www.uniprot.org/uniprot/A6GVY8
GX-01_GM000503	53.5	2.7e-52	Q8A677	Guanylate kinase	gmk	Bacteroides thetaiotaomicron (strain ATCC 29148 / DSM 2079 / NCTC 10582 / E50 / VPI-5482)	https://www.uniprot.org/uniprot/Q8A677
GX-01_GM000505	44.6	7.4e-61	P55929	Cytochrome c551 peroxidase	ccp	Nitrosomonas europaea (strain ATCC 19718 / CIP 103999 / KCTC 2705 / NBRC 14298)	https://www.uniprot.org/uniprot/P55929
GX-01_GM000507	62.7	9.2e-85	Q55791	Probable ATP-dependent transporter slr0075	slr0075	Synechocystis sp. (strain PCC 6803 / Kazusa)	https://www.uniprot.org/uniprot/Q55791
GX-01_GM000509	70.1	1.6e-197	Q55790	UPF0051 protein slr0074	slr0074	Synechocystis sp. (strain PCC 6803 / Kazusa)	https://www.uniprot.org/uniprot/Q55790
GX-01_GM000510	46.2	5.4e-21	Q5P7U0	Putative iron-sulfur cluster insertion protein ErpA	erpA	Aromatoleum aromaticum (strain EbN1)	https://www.uniprot.org/uniprot/Q5P7U0
GX-01_GM000521	42.1	7.1e-06	B8EQQ2	ATP synthase epsilon chain	atpC	Methylocella silvestris (strain DSM 15510 / CIP 108128 / LMG 27833 / NCIMB 13906 / BL2)	https://www.uniprot.org/uniprot/B8EQQ2
GX-01_GM000522	94.2	1.4e-270	A5FLS1	ATP synthase subunit beta	atpD	Flavobacterium johnsoniae (strain ATCC 17061 / DSM 2064 / UW101)	https://www.uniprot.org/uniprot/A5FLS1
GX-01_GM000527	42.6	2.4e-08	P0AFJ3	Protein PhnA	phnA	Escherichia coli O157:H7	https://www.uniprot.org/uniprot/P0AFJ3
GX-01_GM000537	86.1	9.4e-176	A6H064	Ferredoxin--NADP reductase	FP1670	Flavobacterium psychrophilum (strain JIP02/86 / ATCC 49511)	https://www.uniprot.org/uniprot/A6H064
GX-01_GM000538	44.9	6.3e-11	O32119	Putative nitrogen fixation protein YutI	yutI	Bacillus subtilis (strain 168)	https://www.uniprot.org/uniprot/O32119
GX-01_GM000539	40.1	9.4e-65	O66946	Iron-sulfur cluster carrier protein	mrp	Aquifex aeolicus (strain VF5)	https://www.uniprot.org/uniprot/O66946
GX-01_GM000540	48.7	1.4e-08	Q5SI16	DNA base-flipping protein	TTHA1564	Thermus thermophilus (strain HB8 / ATCC 27634 / DSM 579)	https://www.uniprot.org/uniprot/Q5SI16
GX-01_GM000544	70.5	2.3e-95	A0LXL4	tRNA (guanine-N(7)-)-methyltransferase	trmB	Gramella forsetii (strain KT0803)	https://www.uniprot.org/uniprot/A0LXL4
GX-01_GM000548	41	5.3e-39	P35163	Transcriptional regulatory protein ResD	resD	Bacillus subtilis (strain 168)	https://www.uniprot.org/uniprot/P35163
GX-01_GM000556	59.6	1.1e-152	P49787	Biotin carboxylase 1	accC1	Bacillus subtilis (strain 168)	https://www.uniprot.org/uniprot/P49787
GX-01_GM000557	43.5	3.1e-28	P37799	Biotin carboxyl carrier protein of acetyl-CoA carboxylase	accB	Pseudomonas aeruginosa (strain ATCC 15692 / DSM 22644 / CIP 104116 / JCM 14847 / LMG 12228 / 1C / PRS 101 / PAO1)	https://www.uniprot.org/uniprot/P37799
GX-01_GM000558	57.9	5.3e-112	Q8A137	3-oxoacyl-[acyl-carrier-protein] synthase 3 protein 2	fabH2	Bacteroides thetaiotaomicron (strain ATCC 29148 / DSM 2079 / NCTC 10582 / E50 / VPI-5482)	https://www.uniprot.org/uniprot/Q8A137
GX-01_GM000559	92.2	1.4e-29	A5FM90	50S ribosomal protein L32	rpmF	Flavobacterium johnsoniae (strain ATCC 17061 / DSM 2064 / UW101)	https://www.uniprot.org/uniprot/A5FM90
GX-01_GM000561	46.2	4.5e-90	Q89ZK3	4-hydroxythreonine-4-phosphate dehydrogenase	pdxA	Bacteroides thetaiotaomicron (strain ATCC 29148 / DSM 2079 / NCTC 10582 / E50 / VPI-5482)	https://www.uniprot.org/uniprot/Q89ZK3
GX-01_GM000562	41.8	8.7e-38	P50854	Riboflavin synthase	ribE	Actinobacillus pleuropneumoniae	https://www.uniprot.org/uniprot/P50854
GX-01_GM000563	84	8.3e-124	A5FL19	ATP synthase gamma chain	atpG	Flavobacterium johnsoniae (strain ATCC 17061 / DSM 2064 / UW101)	https://www.uniprot.org/uniprot/A5FL19
GX-01_GM000564	93	5.7e-278	A6H2D7	ATP synthase subunit alpha	atpA	Flavobacterium psychrophilum (strain JIP02/86 / ATCC 49511)	https://www.uniprot.org/uniprot/A6H2D7
GX-01_GM000565	67.8	3.3e-60	A6H2D8	ATP synthase subunit delta	atpH	Flavobacterium psychrophilum (strain JIP02/86 / ATCC 49511)	https://www.uniprot.org/uniprot/A6H2D8
GX-01_GM000566	72.9	1.1e-62	A5FL32	ATP synthase subunit b	atpF	Flavobacterium johnsoniae (strain ATCC 17061 / DSM 2064 / UW101)	https://www.uniprot.org/uniprot/A5FL32
GX-01_GM000567	67.9	6.4e-14	Q8A9V0	ATP synthase subunit c	atpE	Bacteroides thetaiotaomicron (strain ATCC 29148 / DSM 2079 / NCTC 10582 / E50 / VPI-5482)	https://www.uniprot.org/uniprot/Q8A9V0
GX-01_GM000568	46	2.5e-47	Q8KGE7	ATP synthase subunit a 2	atpB2	Chlorobaculum tepidum (strain ATCC 49652 / DSM 12025 / NBRC 103806 / TLS)	https://www.uniprot.org/uniprot/Q8KGE7
GX-01_GM000594	51.2	1.4e-57	B2RIV3	Uracil phosphoribosyltransferase	upp	Porphyromonas gingivalis (strain ATCC 33277 / DSM 20709 / CIP 103683 / JCM 12257 / NCTC 11834 / 2561)	https://www.uniprot.org/uniprot/B2RIV3
GX-01_GM000597	46.9	6.6e-99	Q8FB69	Phosphoribosylamine--glycine ligase	purD	Escherichia coli O6:H1 (strain CFT073 / ATCC 700928 / UPEC)	https://www.uniprot.org/uniprot/Q8FB69
GX-01_GM000600	41.2	5e-33	P10498	Exopolysaccharide production protein PSS	pss	Rhizobium leguminosarum bv. phaseoli	https://www.uniprot.org/uniprot/P10498
GX-01_GM000601	51	4.2e-85	Q8NBZ7	UDP-glucuronic acid decarboxylase 1	UXS1	Homo sapiens	https://www.uniprot.org/uniprot/Q8NBZ7
GX-01_GM000602	44	2.2e-58	O66251	dTDP-4-dehydrorhamnose reductase	rmlD	Aggregatibacter actinomycetemcomitans	https://www.uniprot.org/uniprot/O66251
GX-01_GM000603	54.8	1.1e-47	P37745	dTDP-4-dehydrorhamnose 3,5-epimerase	rfbC	Escherichia coli (strain K12)	https://www.uniprot.org/uniprot/P37745
GX-01_GM000609	62.1	9.5e-196	P14407	Fumarate hydratase class I, anaerobic	fumB	Escherichia coli (strain K12)	https://www.uniprot.org/uniprot/P14407
GX-01_GM000630	50	2.6e-84	Q4L3L8	Uncharacterized epimerase/dehydratase SH2450	SH2450	Staphylococcus haemolyticus (strain JCSC1435)	https://www.uniprot.org/uniprot/Q4L3L8
GX-01_GM000632	41.8	3.5e-184	P37474	Transcription-repair-coupling factor	mfd	Bacillus subtilis (strain 168)	https://www.uniprot.org/uniprot/P37474
GX-01_GM000634	59.7	6.5e-36	A6GVQ6	UPF0102 protein FP2501	FP2501	Flavobacterium psychrophilum (strain JIP02/86 / ATCC 49511)	https://www.uniprot.org/uniprot/A6GVQ6
GX-01_GM000636	82.1	0	A6GVQ2	Methionine--tRNA ligase	metG	Flavobacterium psychrophilum (strain JIP02/86 / ATCC 49511)	https://www.uniprot.org/uniprot/A6GVQ2
GX-01_GM000637	47.5	3.7e-37	P43707	Probable bacterial non-heme ferritin	ftnA	Haemophilus influenzae (strain ATCC 51907 / DSM 11121 / KW20 / Rd)	https://www.uniprot.org/uniprot/P43707
GX-01_GM000658	56.1	3.2e-65	P63651	Probable succinyl-CoA:3-ketoacid coenzyme A transferase subunit B	scoB	Mycobacterium bovis (strain ATCC BAA-935 / AF2122/97)	https://www.uniprot.org/uniprot/P63651
GX-01_GM000659	61.3	7.1e-79	Q9ZLE3	Succinyl-CoA:3-ketoacid coenzyme A transferase subunit A	scoA	Helicobacter pylori (strain J99 / ATCC 700824)	https://www.uniprot.org/uniprot/Q9ZLE3
GX-01_GM000661	56	1.8e-44	Q8KRP0	Gliding motility lipoprotein GldH	gldH	Flavobacterium johnsoniae (strain ATCC 17061 / DSM 2064 / UW101)	https://www.uniprot.org/uniprot/Q8KRP0
GX-01_GM000665	53.7	1.2e-102	P59916	Collagenase	prtC	Porphyromonas gingivalis (strain ATCC BAA-308 / W83)	https://www.uniprot.org/uniprot/P59916
GX-01_GM000666	58.4	2.2e-108	A8GCZ9	UPF0176 protein Spro_1886	Spro_1886	Serratia proteamaculans (strain 568)	https://www.uniprot.org/uniprot/A8GCZ9
GX-01_GM000682	40.8	3.4e-35	P43862	DNA-processing protein A	dprA	Haemophilus influenzae (strain ATCC 51907 / DSM 11121 / KW20 / Rd)	https://www.uniprot.org/uniprot/P43862
GX-01_GM000684	44.2	9e-23	P49851	Uncharacterized acyl-CoA thioester hydrolase YkhA	ykhA	Bacillus subtilis (strain 168)	https://www.uniprot.org/uniprot/P49851
GX-01_GM000689	44.1	2.3e-19	P57610	Single-stranded DNA-binding protein	ssb	Buchnera aphidicola subsp. Acyrthosiphon pisum (strain APS)	https://www.uniprot.org/uniprot/P57610
GX-01_GM000694	72.4	1.1e-17	A6H2G3	Sec-independent protein translocase protein TatA	tatA	Flavobacterium psychrophilum (strain JIP02/86 / ATCC 49511)	https://www.uniprot.org/uniprot/A6H2G3
GX-01_GM000698	45	5.2e-165	Q51062	Transcriptional accessory protein Tex	tex	Neisseria gonorrhoeae	https://www.uniprot.org/uniprot/Q51062
GX-01_GM000711	40.2	4e-30	Q9R9S0	UPF0126 membrane protein	yadS	Aeromonas caviae	https://www.uniprot.org/uniprot/Q9R9S0
GX-01_GM000712	52.2	0	Q9KWU4	Pyruvate carboxylase	pyc	Bacillus subtilis (strain 168)	https://www.uniprot.org/uniprot/Q9KWU4
GX-01_GM000714	41.3	5.8e-23	Q73XM4	Ribose-5-phosphate isomerase B	rpiB	Mycobacterium paratuberculosis (strain ATCC BAA-968 / K-10)	https://www.uniprot.org/uniprot/Q73XM4
GX-01_GM000723	57.7	5.5e-186	Q7UX42	Glutamine--tRNA ligase	glnS	Rhodopirellula baltica (strain DSM 10527 / NCIMB 13988 / SH1)	https://www.uniprot.org/uniprot/Q7UX42
GX-01_GM000724	49.2	2.2e-62	Q9SRH6	Hypersensitive-induced response protein 3	HIR3	Arabidopsis thaliana	https://www.uniprot.org/uniprot/Q9SRH6
GX-01_GM000725	79	3.5e-240	A6H2H7	Glutamate--tRNA ligase	gltX	Flavobacterium psychrophilum (strain JIP02/86 / ATCC 49511)	https://www.uniprot.org/uniprot/A6H2H7
GX-01_GM000727	65.7	4.9e-51	A6GVJ9	Endoribonuclease YbeY	ybeY	Flavobacterium psychrophilum (strain JIP02/86 / ATCC 49511)	https://www.uniprot.org/uniprot/A6GVJ9
GX-01_GM000728	80.9	3.6e-303	A6GVK0	tRNA uridine 5-carboxymethylaminomethyl modification enzyme MnmG	mnmG	Flavobacterium psychrophilum (strain JIP02/86 / ATCC 49511)	https://www.uniprot.org/uniprot/A6GVK0
GX-01_GM000741	57.1	1.1e-132	Q8A753	Phosphoglycerate kinase	pgk	Bacteroides thetaiotaomicron (strain ATCC 29148 / DSM 2079 / NCTC 10582 / E50 / VPI-5482)	https://www.uniprot.org/uniprot/Q8A753
GX-01_GM000743	43.2	1e-25	P0AEH3	Protein ElaA	elaA	Escherichia coli (strain K12)	https://www.uniprot.org/uniprot/P0AEH3
GX-01_GM000746	79.2	0	A6H244	Leucine--tRNA ligase	leuS	Flavobacterium psychrophilum (strain JIP02/86 / ATCC 49511)	https://www.uniprot.org/uniprot/A6H244
GX-01_GM000749	69.1	1.6e-112	A5FMG4	Cell division protein FtsX	ftsX	Flavobacterium johnsoniae (strain ATCC 17061 / DSM 2064 / UW101)	https://www.uniprot.org/uniprot/A5FMG4
GX-01_GM000751	56.4	8.2e-71	A6H239	Undecaprenyl-diphosphatase	uppP	Flavobacterium psychrophilum (strain JIP02/86 / ATCC 49511)	https://www.uniprot.org/uniprot/A6H239
GX-01_GM000752	73.3	5.1e-93	Q9RB36	tRNA pseudouridine synthase B	truB	Flavobacterium johnsoniae (strain ATCC 17061 / DSM 2064 / UW101)	https://www.uniprot.org/uniprot/Q9RB36
GX-01_GM000754	47.8	1.1e-45	P05100	DNA-3-methyladenine glycosylase 1	tag	Escherichia coli (strain K12)	https://www.uniprot.org/uniprot/P05100
GX-01_GM000756	76.5	4e-275	Q21NU6	Phosphomethylpyrimidine synthase	thiC	Saccharophagus degradans (strain 2-40 / ATCC 43961 / DSM 17024)	https://www.uniprot.org/uniprot/Q21NU6
GX-01_GM000759	50.5	3.2e-54	A6GWR9	Thiamine-phosphate synthase	thiE	Flavobacterium psychrophilum (strain JIP02/86 / ATCC 49511)	https://www.uniprot.org/uniprot/A6GWR9
GX-01_GM000760	83.1	1.2e-111	A6GWS0	Thiazole synthase	thiG	Flavobacterium psychrophilum (strain JIP02/86 / ATCC 49511)	https://www.uniprot.org/uniprot/A6GWS0
GX-01_GM000761	50.1	9.8e-107	Q9S498	2-iminoacetate synthase	thiH	Salmonella typhimurium (strain LT2 / SGSC1412 / ATCC 700720)	https://www.uniprot.org/uniprot/Q9S498
GX-01_GM000763	46	2.5e-56	Q7PY41	Adenylyltransferase and sulfurtransferase MOCS3	AGAP001737	Anopheles gambiae	https://www.uniprot.org/uniprot/Q7PY41
GX-01_GM000768	66.7	1.1e-81	A6H233	Leucyl/phenylalanyl-tRNA--protein transferase	aat	Flavobacterium psychrophilum (strain JIP02/86 / ATCC 49511)	https://www.uniprot.org/uniprot/A6H233
GX-01_GM000773	52.2	8.1e-57	Q9ABA6	Biosynthetic peptidoglycan transglycosylase	mtgA	Caulobacter vibrioides (strain ATCC 19089 / CB15)	https://www.uniprot.org/uniprot/Q9ABA6
GX-01_GM000797	41.5	1.4e-06	P55409	Uncharacterized HTH-type transcriptional regulator y4dJ	NGR_a04070	Sinorhizobium fredii (strain NBRC 101917 / NGR234)	https://www.uniprot.org/uniprot/P55409
GX-01_GM000804	41.5	1.4e-06	P55409	Uncharacterized HTH-type transcriptional regulator y4dJ	NGR_a04070	Sinorhizobium fredii (strain NBRC 101917 / NGR234)	https://www.uniprot.org/uniprot/P55409
GX-01_GM000841	41.5	1.4e-06	P55409	Uncharacterized HTH-type transcriptional regulator y4dJ	NGR_a04070	Sinorhizobium fredii (strain NBRC 101917 / NGR234)	https://www.uniprot.org/uniprot/P55409
GX-01_GM000849	91.5	0	A5FLU8	Elongation factor 4	lepA	Flavobacterium johnsoniae (strain ATCC 17061 / DSM 2064 / UW101)	https://www.uniprot.org/uniprot/A5FLU8
GX-01_GM000850	40.6	3.1e-56	Q88DK5	tRNA-dihydrouridine synthase B	dusB	Pseudomonas putida (strain ATCC 47054 / DSM 6125 / NCIMB 11950 / KT2440)	https://www.uniprot.org/uniprot/Q88DK5
GX-01_GM000851	74.2	1.9e-236	Q7MU78	Phosphoenolpyruvate carboxykinase (ATP)	pckA	Porphyromonas gingivalis (strain ATCC BAA-308 / W83)	https://www.uniprot.org/uniprot/Q7MU78
GX-01_GM000854	47.3	2.2e-122	O07576	Uncharacterized amino acid permease YhdG	yhdG	Bacillus subtilis (strain 168)	https://www.uniprot.org/uniprot/O07576
GX-01_GM000856	80.8	1.3e-286	A6GW65	UvrABC system protein C	uvrC	Flavobacterium psychrophilum (strain JIP02/86 / ATCC 49511)	https://www.uniprot.org/uniprot/A6GW65
GX-01_GM000858	65.5	6.8e-78	P28760	Superoxide dismutase [Mn]	sodA	Bacillus caldotenax	https://www.uniprot.org/uniprot/P28760
GX-01_GM000860	62.2	3.6e-139	P0AB78	2-amino-3-ketobutyrate coenzyme A ligase	kbl	Escherichia coli O157:H7	https://www.uniprot.org/uniprot/P0AB78
GX-01_GM000877	41.6	3.1e-51	P0DP67	Omega-amidase YafV	yafV	Yersinia enterocolitica	https://www.uniprot.org/uniprot/P0DP67
GX-01_GM000895	45.6	1.3e-23	O34360	Peptidoglycan L-alanyl-D-glutamate endopeptidase CwlK	cwlK	Bacillus subtilis (strain 168)	https://www.uniprot.org/uniprot/O34360
GX-01_GM000899	51.7	7.4e-137	Q8KAB1	Glycine--tRNA ligase	glyQS	Chlorobaculum tepidum (strain ATCC 49652 / DSM 12025 / NBRC 103806 / TLS)	https://www.uniprot.org/uniprot/Q8KAB1
GX-01_GM000904	44.1	4.6e-94	P52993	Dihydrolipoyllysine-residue succinyltransferase component of 2-oxoglutarate dehydrogenase complex	sucB	Cupriavidus necator (strain ATCC 17699 / H16 / DSM 428 / Stanier 337)	https://www.uniprot.org/uniprot/P52993
GX-01_GM000905	42.6	1.4e-207	Q59106	2-oxoglutarate dehydrogenase E1 component	odhA	Cupriavidus necator (strain ATCC 17699 / H16 / DSM 428 / Stanier 337)	https://www.uniprot.org/uniprot/Q59106
GX-01_GM000911	42.3	1.6e-44	Q8PW34	Geranylgeranyl diphosphate synthase	MM_1767	Methanosarcina mazei (strain ATCC BAA-159 / DSM 3647 / Goe1 / Go1 / JCM 11833 / OCM 88)	https://www.uniprot.org/uniprot/Q8PW34
GX-01_GM000917	41	8.5e-72	P02981	Tetracycline resistance protein, class C	tetA	Escherichia coli	https://www.uniprot.org/uniprot/P02981
GX-01_GM000923	76.8	4.6e-111	A5FLP4	Ribosomal RNA small subunit methyltransferase A	rsmA	Flavobacterium johnsoniae (strain ATCC 17061 / DSM 2064 / UW101)	https://www.uniprot.org/uniprot/A5FLP4
GX-01_GM000926	48.2	8.8e-112	Q2S1G4	Serine--tRNA ligase	serS	Salinibacter ruber (strain DSM 13855 / M31)	https://www.uniprot.org/uniprot/Q2S1G4
GX-01_GM000930	43.9	1e-28	Q8TI34	Methylated-DNA--protein-cysteine methyltransferase	ogt	Methanosarcina acetivorans (strain ATCC 35395 / DSM 2834 / JCM 12185 / C2A)	https://www.uniprot.org/uniprot/Q8TI34
GX-01_GM000932	56.3	3.8e-102	Q8KCJ0	Delta-aminolevulinic acid dehydratase	hemB	Chlorobaculum tepidum (strain ATCC 49652 / DSM 12025 / NBRC 103806 / TLS)	https://www.uniprot.org/uniprot/Q8KCJ0
GX-01_GM000934	51.6	1.3e-88	P35055	Oxygen-dependent coproporphyrinogen-III oxidase, chloroplastic	CPX	Glycine max	https://www.uniprot.org/uniprot/P35055
GX-01_GM000936	84.6	1e-169	A5FLE7	Uroporphyrinogen decarboxylase	hemE	Flavobacterium johnsoniae (strain ATCC 17061 / DSM 2064 / UW101)	https://www.uniprot.org/uniprot/A5FLE7
GX-01_GM000938	40.1	1.7e-51	Q6H6D2	Porphobilinogen deaminase, chloroplastic	HEMC	Oryza sativa subsp. japonica	https://www.uniprot.org/uniprot/Q6H6D2
GX-01_GM000939	78.9	6.2e-185	A6GVP1	Glutamyl-tRNA reductase	hemA	Flavobacterium psychrophilum (strain JIP02/86 / ATCC 49511)	https://www.uniprot.org/uniprot/A6GVP1
GX-01_GM000941	48.8	6.8e-83	Q888A2	Ferrochelatase	hemH	Pseudomonas syringae pv. tomato (strain ATCC BAA-871 / DC3000)	https://www.uniprot.org/uniprot/Q888A2
GX-01_GM000942	43	3.3e-31	P72793	UPF0093 membrane protein slr1790	slr1790	Synechocystis sp. (strain PCC 6803 / Kazusa)	https://www.uniprot.org/uniprot/P72793
GX-01_GM000944	49.4	2.6e-61	P52046	Short-chain-enoyl-CoA hydratase	crt	Clostridium acetobutylicum (strain ATCC 824 / DSM 792 / JCM 1419 / LMG 5710 / VKM B-1787)	https://www.uniprot.org/uniprot/P52046
GX-01_GM000946	48.5	4.5e-87	Q9M879	Stearoyl-[acyl-carrier-protein] 9-desaturase 5, chloroplastic	S-ACP-DES5	Arabidopsis thaliana	https://www.uniprot.org/uniprot/Q9M879
GX-01_GM000948	59	3.2e-39	Q11WG7	UPF0403 protein CHU_0972	CHU_0972	Cytophaga hutchinsonii (strain ATCC 33406 / NCIMB 9469)	https://www.uniprot.org/uniprot/Q11WG7
GX-01_GM000953	74.3	8e-57	A5FL22	Deoxyuridine 5'-triphosphate nucleotidohydrolase	dut	Flavobacterium johnsoniae (strain ATCC 17061 / DSM 2064 / UW101)	https://www.uniprot.org/uniprot/A5FL22
GX-01_GM000960	59.8	1.7e-140	Q89K67	Divalent metal cation transporter MntH	mntH	Bradyrhizobium diazoefficiens (strain JCM 10833 / IAM 13628 / NBRC 14792 / USDA 110)	https://www.uniprot.org/uniprot/Q89K67
GX-01_GM000962	40.6	1.3e-144	Q5XPH7	Fe(2+) transporter FeoB	feoB	Leptospira biflexa serovar Patoc (strain Patoc 1 / ATCC 23582 / Paris)	https://www.uniprot.org/uniprot/Q5XPH7
GX-01_GM000964	41.4	1.7e-15	P0AAT3	Uncharacterized protein YbdF	ybdF	Escherichia coli O157:H7	https://www.uniprot.org/uniprot/P0AAT3
GX-01_GM000968	82	1.4e-82	A0LXG7	Crossover junction endodeoxyribonuclease RuvC	ruvC	Gramella forsetii (strain KT0803)	https://www.uniprot.org/uniprot/A0LXG7
GX-01_GM000974	63.7	3.4e-209	A0M665	Glucose-6-phosphate isomerase	pgi	Gramella forsetii (strain KT0803)	https://www.uniprot.org/uniprot/A0M665
GX-01_GM000977	46.4	1.7e-75	Q7UQA4	Tryptophan--tRNA ligase	trpS	Rhodopirellula baltica (strain DSM 10527 / NCIMB 13988 / SH1)	https://www.uniprot.org/uniprot/Q7UQA4
GX-01_GM001020	58.1	1.6e-97	Q7MT83	Ribose-phosphate pyrophosphokinase	prs	Porphyromonas gingivalis (strain ATCC BAA-308 / W83)	https://www.uniprot.org/uniprot/Q7MT83
GX-01_GM001021	78.7	1.2e-90	A6GVZ1	50S ribosomal protein L25	rplY	Flavobacterium psychrophilum (strain JIP02/86 / ATCC 49511)	https://www.uniprot.org/uniprot/A6GVZ1
GX-01_GM001022	55.4	6.8e-56	B2RHF2	Peptidyl-tRNA hydrolase	pth	Porphyromonas gingivalis (strain ATCC 33277 / DSM 20709 / CIP 103683 / JCM 12257 / NCTC 11834 / 2561)	https://www.uniprot.org/uniprot/B2RHF2
GX-01_GM001029	45.7	2.3e-84	Q01566	Type II secretion system protein E	outE	Dickeya dadantii (strain 3937)	https://www.uniprot.org/uniprot/Q01566
GX-01_GM001036	41.8	1.7e-06	P00259	Putidaredoxin	camB	Pseudomonas putida	https://www.uniprot.org/uniprot/P00259
GX-01_GM001038	52.6	1e-109	Q2KHZ9	Glutaryl-CoA dehydrogenase, mitochondrial	GCDH	Bos taurus	https://www.uniprot.org/uniprot/Q2KHZ9
GX-01_GM001040	81.5	1.5e-54	A5FL10	Ribosome-binding factor A	rbfA	Flavobacterium johnsoniae (strain ATCC 17061 / DSM 2064 / UW101)	https://www.uniprot.org/uniprot/A5FL10
GX-01_GM001041	53.5	1.4e-31	O58010	Methylmalonyl-CoA epimerase	PH0272	Pyrococcus horikoshii (strain ATCC 700860 / DSM 12428 / JCM 9974 / NBRC 100139 / OT-3)	https://www.uniprot.org/uniprot/O58010
GX-01_GM001060	51	4.6e-23	A5FMW5	UPF0758 protein Fjoh_0413	Fjoh_0413	Flavobacterium johnsoniae (strain ATCC 17061 / DSM 2064 / UW101)	https://www.uniprot.org/uniprot/A5FMW5
GX-01_GM001070	66.4	7.1e-84	Q87MQ5	Aquaporin Z	aqpZ	Vibrio parahaemolyticus serotype O3:K6 (strain RIMD 2210633)	https://www.uniprot.org/uniprot/Q87MQ5
GX-01_GM001072	90.4	3.8e-188	A5FLT1	Biotin synthase	bioB	Flavobacterium johnsoniae (strain ATCC 17061 / DSM 2064 / UW101)	https://www.uniprot.org/uniprot/A5FLT1
GX-01_GM001074	74.9	3.8e-142	Q59717	Protein RecA	recA	Prevotella ruminicola (strain ATCC 19189 / JCM 8958 / 23)	https://www.uniprot.org/uniprot/Q59717
GX-01_GM001075	42.1	3.5e-19	P0A5B6	Uncharacterized HIT-like protein Mb0782c	BQ2027_MB0782C	Mycobacterium bovis (strain ATCC BAA-935 / AF2122/97)	https://www.uniprot.org/uniprot/P0A5B6
GX-01_GM001076	85.4	2.8e-69	A5FJJ8	Transcription elongation factor GreA	greA	Flavobacterium johnsoniae (strain ATCC 17061 / DSM 2064 / UW101)	https://www.uniprot.org/uniprot/A5FJJ8
GX-01_GM001078	40	1.1e-79	Q97Y16	Putative dioxygenase SSO1533	SSO1533	Sulfolobus solfataricus (strain ATCC 35092 / DSM 1617 / JCM 11322 / P2)	https://www.uniprot.org/uniprot/Q97Y16
GX-01_GM001079	48.9	1.6e-96	Q6CDR5	4-hydroxyphenylpyruvate dioxygenase	YALI0B21846g	Yarrowia lipolytica (strain CLIB 122 / E 150)	https://www.uniprot.org/uniprot/Q6CDR5
GX-01_GM001080	65.1	4.9e-88	A5FKD7	tRNA1(Val) (adenine(37)-N6)-methyltransferase	Fjoh_1299	Flavobacterium johnsoniae (strain ATCC 17061 / DSM 2064 / UW101)	https://www.uniprot.org/uniprot/A5FKD7
GX-01_GM001081	66.7	1.8e-66	A6GWI5	Ribosome maturation factor RimM	rimM	Flavobacterium psychrophilum (strain JIP02/86 / ATCC 49511)	https://www.uniprot.org/uniprot/A6GWI5
GX-01_GM001082	70.9	3.8e-69	A5FKD9	30S ribosomal protein S16	rpsP	Flavobacterium johnsoniae (strain ATCC 17061 / DSM 2064 / UW101)	https://www.uniprot.org/uniprot/A5FKD9
GX-01_GM001085	54.5	3.3e-28	P0A4L1	Thioredoxin 1	trxA	Nostoc sp. (strain PCC 7120 / SAG 25.82 / UTEX 2576)	https://www.uniprot.org/uniprot/P0A4L1
GX-01_GM001089	84.9	4.5e-292	A5FKJ2	Aspartate--tRNA ligase	aspS	Flavobacterium johnsoniae (strain ATCC 17061 / DSM 2064 / UW101)	https://www.uniprot.org/uniprot/A5FKJ2
GX-01_GM001093	58.5	2.1e-12	Q9S170	Cold shock-like protein CspG	cspG	Shewanella violacea (strain JCM 10179 / CIP 106290 / LMG 19151 / DSS12)	https://www.uniprot.org/uniprot/Q9S170
GX-01_GM001094	44.7	9.8e-28	Q99W51	tRNA-specific adenosine deaminase	tadA	Staphylococcus aureus (strain Mu50 / ATCC 700699)	https://www.uniprot.org/uniprot/Q99W51
GX-01_GM001095	51.3	1.1e-184	Q5LH44	1-deoxy-D-xylulose-5-phosphate synthase	dxs	Bacteroides fragilis (strain ATCC 25285 / DSM 2151 / JCM 11019 / NCTC 9343)	https://www.uniprot.org/uniprot/Q5LH44
GX-01_GM001097	40.7	1.8e-78	Q55731	Deoxyguanosinetriphosphate triphosphohydrolase-like protein	sll0398	Synechocystis sp. (strain PCC 6803 / Kazusa)	https://www.uniprot.org/uniprot/Q55731
GX-01_GM001099	65.9	5.3e-307	P21524	Ribonucleoside-diphosphate reductase large chain 1	RNR1	Saccharomyces cerevisiae (strain ATCC 204508 / S288c)	https://www.uniprot.org/uniprot/P21524
GX-01_GM001100	71.4	2.3e-128	Q9C167	Ribonucleoside-diphosphate reductase small chain	rnr-2	Neurospora crassa (strain ATCC 24698 / 74-OR23-1A / CBS 708.71 / DSM 1257 / FGSC 987)	https://www.uniprot.org/uniprot/Q9C167
GX-01_GM001105	40	7.7e-15	P32393	ComE operon protein 2	comEB	Bacillus subtilis (strain 168)	https://www.uniprot.org/uniprot/P32393
GX-01_GM001108	70.8	2e-58	A6GWV6	Ribosome maturation factor RimP	rimP	Flavobacterium psychrophilum (strain JIP02/86 / ATCC 49511)	https://www.uniprot.org/uniprot/A6GWV6
GX-01_GM001110	74.4	0	A6GWV8	Translation initiation factor IF-2	infB	Flavobacterium psychrophilum (strain JIP02/86 / ATCC 49511)	https://www.uniprot.org/uniprot/A6GWV8
GX-01_GM001112	85.3	5.9e-167	A6H1G3	Holliday junction ATP-dependent DNA helicase RuvB	ruvB	Flavobacterium psychrophilum (strain JIP02/86 / ATCC 49511)	https://www.uniprot.org/uniprot/A6H1G3
GX-01_GM001113	79.9	9.5e-148	A6H1G2	Epoxyqueuosine reductase	queG	Flavobacterium psychrophilum (strain JIP02/86 / ATCC 49511)	https://www.uniprot.org/uniprot/A6H1G2
GX-01_GM001114	50.1	5.5e-197	Q9ZFV8	NADP-dependent malic enzyme	maeB	Salmonella typhimurium (strain LT2 / SGSC1412 / ATCC 700720)	https://www.uniprot.org/uniprot/Q9ZFV8
GX-01_GM001115	80.8	1e-83	A6H1G0	Holliday junction ATP-dependent DNA helicase RuvA	ruvA	Flavobacterium psychrophilum (strain JIP02/86 / ATCC 49511)	https://www.uniprot.org/uniprot/A6H1G0
GX-01_GM001117	70.6	1.9e-49	A0LXS6	Glycine cleavage system H protein	gcvH	Gramella forsetii (strain KT0803)	https://www.uniprot.org/uniprot/A0LXS6
GX-01_GM001144	75.9	2.2e-130	A6H1E4	Protoheme IX farnesyltransferase	ctaB	Flavobacterium psychrophilum (strain JIP02/86 / ATCC 49511)	https://www.uniprot.org/uniprot/A6H1E4
GX-01_GM001150	49.1	6.7e-37	O31845	Uncharacterized membrane protein YozB	yozB	Bacillus subtilis (strain 168)	https://www.uniprot.org/uniprot/O31845
GX-01_GM001160	42.1	2.3e-34	Q9C6B3	Gamma carbonic anhydrase 2, mitochondrial	GAMMACA2	Arabidopsis thaliana	https://www.uniprot.org/uniprot/Q9C6B3
GX-01_GM001161	40.4	2e-53	A4XR64	Glutamate racemase	murI	Pseudomonas mendocina (strain ymp)	https://www.uniprot.org/uniprot/A4XR64
GX-01_GM001165	53.1	4.9e-70	Q8A1E0	Isoprenyl transferase	uppS	Bacteroides thetaiotaomicron (strain ATCC 29148 / DSM 2079 / NCTC 10582 / E50 / VPI-5482)	https://www.uniprot.org/uniprot/Q8A1E0
GX-01_GM001167	74.1	1.7e-122	A6H1D1	NAD kinase	nadK	Flavobacterium psychrophilum (strain JIP02/86 / ATCC 49511)	https://www.uniprot.org/uniprot/A6H1D1
GX-01_GM001169	82.6	2.8e-110	A5FJ95	Pyridoxine 5'-phosphate synthase	pdxJ	Flavobacterium johnsoniae (strain ATCC 17061 / DSM 2064 / UW101)	https://www.uniprot.org/uniprot/A5FJ95
GX-01_GM001174	72.7	1.2e-85	Q8A129	ATP-dependent Clp protease proteolytic subunit	clpP	Bacteroides thetaiotaomicron (strain ATCC 29148 / DSM 2079 / NCTC 10582 / E50 / VPI-5482)	https://www.uniprot.org/uniprot/Q8A129
GX-01_GM001175	65	3.3e-148	Q8A128	ATP-dependent Clp protease ATP-binding subunit ClpX	clpX	Bacteroides thetaiotaomicron (strain ATCC 29148 / DSM 2079 / NCTC 10582 / E50 / VPI-5482)	https://www.uniprot.org/uniprot/Q8A128
GX-01_GM001184	85.9	0	A6GWN3	DNA mismatch repair protein MutS	mutS	Flavobacterium psychrophilum (strain JIP02/86 / ATCC 49511)	https://www.uniprot.org/uniprot/A6GWN3
GX-01_GM001199	40.7	3.2e-22	Q96F10	Diamine acetyltransferase 2	SAT2	Homo sapiens	https://www.uniprot.org/uniprot/Q96F10
GX-01_GM001201	90.4	2.8e-177	A6GWD9	Fructose-1,6-bisphosphatase class 1	fbp	Flavobacterium psychrophilum (strain JIP02/86 / ATCC 49511)	https://www.uniprot.org/uniprot/A6GWD9
GX-01_GM001203	66.2	2.9e-83	A6H2B4	Type III pantothenate kinase	coaX	Flavobacterium psychrophilum (strain JIP02/86 / ATCC 49511)	https://www.uniprot.org/uniprot/A6H2B4
GX-01_GM001212	73.1	6.1e-108	A6H213	5'-nucleotidase SurE	surE	Flavobacterium psychrophilum (strain JIP02/86 / ATCC 49511)	https://www.uniprot.org/uniprot/A6H213
GX-01_GM001230	47.4	3.5e-82	P39751	MreB-like protein	mbl	Bacillus subtilis (strain 168)	https://www.uniprot.org/uniprot/P39751
GX-01_GM001233	63.5	2.6e-182	Q8A155	Bifunctional purine biosynthesis protein PurH	purH	Bacteroides thetaiotaomicron (strain ATCC 29148 / DSM 2079 / NCTC 10582 / E50 / VPI-5482)	https://www.uniprot.org/uniprot/Q8A155
GX-01_GM001235	89.1	3.3e-147	A6GWG2	Acetyl-coenzyme A carboxylase carboxyl transferase subunit beta	accD	Flavobacterium psychrophilum (strain JIP02/86 / ATCC 49511)	https://www.uniprot.org/uniprot/A6GWG2
GX-01_GM001236	68.7	1.7e-140	O52402	Fructose-bisphosphate aldolase	fba	Edwardsiella ictaluri (strain 93-146)	https://www.uniprot.org/uniprot/O52402
GX-01_GM001240	50	3.9e-64	Q8A005	Demethylmenaquinone methyltransferase	menG	Bacteroides thetaiotaomicron (strain ATCC 29148 / DSM 2079 / NCTC 10582 / E50 / VPI-5482)	https://www.uniprot.org/uniprot/Q8A005
GX-01_GM001253	61.2	4.6e-54	Q8PWY5	Inorganic pyrophosphatase	ppa	Methanosarcina mazei (strain ATCC BAA-159 / DSM 3647 / Goe1 / Go1 / JCM 11833 / OCM 88)	https://www.uniprot.org/uniprot/Q8PWY5
GX-01_GM001255	55.8	1.9e-98	O66113	Pyruvate dehydrogenase E1 component subunit beta	pdhB	Zymomonas mobilis subsp. mobilis (strain ATCC 31821 / ZM4 / CP4)	https://www.uniprot.org/uniprot/O66113
GX-01_GM001258	40	2.6e-17	P9WLR4	Uncharacterized protein MT1877	MT1877	Mycobacterium tuberculosis (strain CDC 1551 / Oshkosh)	https://www.uniprot.org/uniprot/P9WLR4
GX-01_GM001259	83.6	5.5e-139	A0LY29	Thymidylate synthase	thyA	Gramella forsetii (strain KT0803)	https://www.uniprot.org/uniprot/A0LY29
GX-01_GM001262	40.3	4.1e-38	P37529	Deoxyadenosine/deoxycytidine kinase	dck	Bacillus subtilis (strain 168)	https://www.uniprot.org/uniprot/P37529
GX-01_GM001264	82.3	7.3e-199	A5FJU1	S-adenosylmethionine synthase	metK	Flavobacterium johnsoniae (strain ATCC 17061 / DSM 2064 / UW101)	https://www.uniprot.org/uniprot/A5FJU1
GX-01_GM001272	54.2	1.8e-58	P56891	Phosphoadenosine phosphosulfate reductase	cysH	Rhizobium meliloti (strain 1021)	https://www.uniprot.org/uniprot/P56891
GX-01_GM001273	55.9	7.2e-100	A4T8Q2	Sulfate adenylyltransferase subunit 2	cysD	Mycobacterium gilvum (strain PYR-GCK)	https://www.uniprot.org/uniprot/A4T8Q2
GX-01_GM001274	47.7	6.8e-101	C5BSJ5	Sulfate adenylyltransferase subunit 1	cysN	Teredinibacter turnerae (strain ATCC 39867 / T7901)	https://www.uniprot.org/uniprot/C5BSJ5
GX-01_GM001275	44.8	1.6e-42	Q59967	Serine acetyltransferase, plasmid	srpH	Synechococcus elongatus (strain PCC 7942)	https://www.uniprot.org/uniprot/Q59967
GX-01_GM001276	72.9	4e-106	Q59447	Cysteine synthase	cysK	Flavobacterium sp. (strain K3-15 / DSM ID92-509)	https://www.uniprot.org/uniprot/Q59447
GX-01_GM001278	42.2	2.6e-51	Q21K21	Siroheme synthase	cysG	Saccharophagus degradans (strain 2-40 / ATCC 43961 / DSM 17024)	https://www.uniprot.org/uniprot/Q21K21
GX-01_GM001279	44.9	4.2e-53	Q9JUD8	Sulfite reductase [NADPH] flavoprotein alpha-component	cysJ	Neisseria meningitidis serogroup A / serotype 4A (strain Z2491)	https://www.uniprot.org/uniprot/Q9JUD8
GX-01_GM001280	57.6	1.7e-179	B0SF75	Sulfite reductase [NADPH] hemoprotein beta-component	cysI	Leptospira biflexa serovar Patoc (strain Patoc 1 / Ames)	https://www.uniprot.org/uniprot/B0SF75
GX-01_GM001282	40.1	1.1e-39	O34430	Probable membrane transporter protein YtnM	ytnM	Bacillus subtilis (strain 168)	https://www.uniprot.org/uniprot/O34430
GX-01_GM001284	40.5	4.1e-49	Q5B998	Homoserine dehydrogenase	AN2882	Emericella nidulans (strain FGSC A4 / ATCC 38163 / CBS 112.46 / NRRL 194 / M139)	https://www.uniprot.org/uniprot/Q5B998
GX-01_GM001285	61.8	9.3e-268	P37586	Methionine synthase	metH	Salmonella typhimurium (strain LT2 / SGSC1412 / ATCC 700720)	https://www.uniprot.org/uniprot/P37586
GX-01_GM001298	40.2	1.2e-29	Q6L0D1	NH(3)-dependent NAD(+) synthetase	nadE	Picrophilus torridus (strain ATCC 700027 / DSM 9790 / JCM 10055 / NBRC 100828)	https://www.uniprot.org/uniprot/Q6L0D1
GX-01_GM001303	82.8	3.3e-96	A6H1A5	Probable GTP-binding protein EngB	engB	Flavobacterium psychrophilum (strain JIP02/86 / ATCC 49511)	https://www.uniprot.org/uniprot/A6H1A5
GX-01_GM001306	87.2	8.6e-216	A6H0U4	Adenylosuccinate synthetase	purA	Flavobacterium psychrophilum (strain JIP02/86 / ATCC 49511)	https://www.uniprot.org/uniprot/A6H0U4
GX-01_GM001308	81.5	3.4e-69	A6H1A3	Transcriptional regulator MraZ	mraZ	Flavobacterium psychrophilum (strain JIP02/86 / ATCC 49511)	https://www.uniprot.org/uniprot/A6H1A3
GX-01_GM001309	81	5.2e-135	A6H1A2	Ribosomal RNA small subunit methyltransferase H	rsmH	Flavobacterium psychrophilum (strain JIP02/86 / ATCC 49511)	https://www.uniprot.org/uniprot/A6H1A2
GX-01_GM001312	53.6	5e-151	Q11RG9	UDP-N-acetylmuramoyl-L-alanyl-D-glutamate--2,6-diaminopimelate ligase	murE	Cytophaga hutchinsonii (strain ATCC 33406 / NCIMB 9469)	https://www.uniprot.org/uniprot/Q11RG9
GX-01_GM001313	82.9	4.6e-198	A6H198	Phospho-N-acetylmuramoyl-pentapeptide-transferase	mraY	Flavobacterium psychrophilum (strain JIP02/86 / ATCC 49511)	https://www.uniprot.org/uniprot/A6H198
GX-01_GM001314	69.2	5.1e-179	A0M529	UDP-N-acetylmuramoylalanine--D-glutamate ligase	murD	Gramella forsetii (strain KT0803)	https://www.uniprot.org/uniprot/A0M529
GX-01_GM001316	80.5	1e-164	A6H195	UDP-N-acetylglucosamine--N-acetylmuramyl-(pentapeptide) pyrophosphoryl-undecaprenol N-acetylglucosamine transferase	murG	Flavobacterium psychrophilum (strain JIP02/86 / ATCC 49511)	https://www.uniprot.org/uniprot/A6H195
GX-01_GM001317	82.3	6.5e-214	A6H194	UDP-N-acetylmuramate--L-alanine ligase	murC	Flavobacterium psychrophilum (strain JIP02/86 / ATCC 49511)	https://www.uniprot.org/uniprot/A6H194
GX-01_GM001320	50.8	3.9e-77	O08466	Cell division protein FtsZ	ftsZ	Porphyromonas gingivalis (strain ATCC BAA-308 / W83)	https://www.uniprot.org/uniprot/O08466
GX-01_GM001324	49.8	8.2e-69	P33656	RNA polymerase sigma factor SigA	sigA	Clostridium acetobutylicum (strain ATCC 824 / DSM 792 / JCM 1419 / LMG 5710 / VKM B-1787)	https://www.uniprot.org/uniprot/P33656
GX-01_GM001325	82.6	0	A5FJZ1	Polyribonucleotide nucleotidyltransferase	pnp	Flavobacterium johnsoniae (strain ATCC 17061 / DSM 2064 / UW101)	https://www.uniprot.org/uniprot/A5FJZ1
GX-01_GM001327	82	1.2e-34	A5FJZ2	30S ribosomal protein S15	rpsO	Flavobacterium johnsoniae (strain ATCC 17061 / DSM 2064 / UW101)	https://www.uniprot.org/uniprot/A5FJZ2
GX-01_GM001328	41.8	2.1e-15	O34553	Protein YtsP	ytsP	Bacillus subtilis (strain 168)	https://www.uniprot.org/uniprot/O34553
GX-01_GM001338	53.2	1.8e-60	P61517	Carbonic anhydrase 2	can	Escherichia coli (strain K12)	https://www.uniprot.org/uniprot/P61517
GX-01_GM001347	56	3.5e-233	C1DDM9	UPF0753 protein Avin_17870	Avin_17870	Azotobacter vinelandii (strain DJ / ATCC BAA-1303)	https://www.uniprot.org/uniprot/C1DDM9
GX-01_GM001359	42.4	7.7e-52	P51831	3-oxoacyl-[acyl-carrier-protein] reductase FabG	fabG	Bacillus subtilis (strain 168)	https://www.uniprot.org/uniprot/P51831
GX-01_GM001360	40.1	3.6e-78	P0A954	3-oxoacyl-[acyl-carrier-protein] synthase 1	fabB	Escherichia coli O6:H1 (strain CFT073 / ATCC 700928 / UPEC)	https://www.uniprot.org/uniprot/P0A954
GX-01_GM001361	42.3	1.6e-09	Q8RGX5	Acyl carrier protein	acpP	Fusobacterium nucleatum subsp. nucleatum (strain ATCC 25586 / CIP 101130 / JCM 8532 / LMG 13131)	https://www.uniprot.org/uniprot/Q8RGX5
GX-01_GM001369	48.8	5e-54	P94440	Uncharacterized ABC transporter ATP-binding protein YfiL	yfiL	Bacillus subtilis (strain 168)	https://www.uniprot.org/uniprot/P94440
GX-01_GM001396	42.7	7e-47	Q9AE24	Transcriptional regulatory protein RprY	rprY	Bacteroides fragilis (strain YCH46)	https://www.uniprot.org/uniprot/Q9AE24
GX-01_GM001399	91.3	1.2e-275	A5FIV1	60 kDa chaperonin	groL	Flavobacterium johnsoniae (strain ATCC 17061 / DSM 2064 / UW101)	https://www.uniprot.org/uniprot/A5FIV1
GX-01_GM001401	67.4	2e-29	B2RKS5	10 kDa chaperonin	groS	Porphyromonas gingivalis (strain ATCC 33277 / DSM 20709 / CIP 103683 / JCM 12257 / NCTC 11834 / 2561)	https://www.uniprot.org/uniprot/B2RKS5
GX-01_GM001405	47.5	3.6e-57	P05407	Nif-specific regulatory protein	nifA	Bradyrhizobium diazoefficiens (strain JCM 10833 / IAM 13628 / NBRC 14792 / USDA 110)	https://www.uniprot.org/uniprot/P05407
GX-01_GM001407	77.7	5.5e-219	A6H119	tRNA-2-methylthio-N(6)-dimethylallyladenosine synthase	miaB	Flavobacterium psychrophilum (strain JIP02/86 / ATCC 49511)	https://www.uniprot.org/uniprot/A6H119
GX-01_GM001408	42.5	2.5e-166	Q87AQ6	DNA topoisomerase 1	topA	Xylella fastidiosa (strain Temecula1 / ATCC 700964)	https://www.uniprot.org/uniprot/Q87AQ6
GX-01_GM001430	51	1e-111	P43885	D-3-phosphoglycerate dehydrogenase	serA	Haemophilus influenzae (strain ATCC 51907 / DSM 11121 / KW20 / Rd)	https://www.uniprot.org/uniprot/P43885
GX-01_GM001432	53	1.6e-109	Q98A07	Histidine decarboxylase	hdc	Mesorhizobium japonicum (strain LMG 29417 / CECT 9101 / MAFF 303099)	https://www.uniprot.org/uniprot/Q98A07
GX-01_GM001472	57.7	2e-97	P44169	Uncharacterized protein HI_1375	HI_1375	Haemophilus influenzae (strain ATCC 51907 / DSM 11121 / KW20 / Rd)	https://www.uniprot.org/uniprot/P44169
GX-01_GM001473	84.4	0	A5FMT0	Glycine dehydrogenase (decarboxylating)	gcvP	Flavobacterium johnsoniae (strain ATCC 17061 / DSM 2064 / UW101)	https://www.uniprot.org/uniprot/A5FMT0
GX-01_GM001488	61.6	8.9e-49	Q9WYS7	N5-carboxyaminoimidazole ribonucleotide mutase	purE	Thermotoga maritima (strain ATCC 43589 / MSB8 / DSM 3109 / JCM 10099)	https://www.uniprot.org/uniprot/Q9WYS7
GX-01_GM001492	45.8	4.2e-31	P0DD40	Hypoxanthine-guanine phosphoribosyltransferase	hpt	Streptococcus pyogenes serotype M3 (strain ATCC BAA-595 / MGAS315)	https://www.uniprot.org/uniprot/P0DD40
GX-01_GM001493	81.1	3.9e-83	A6GZB9	Adenylate kinase	adk	Flavobacterium psychrophilum (strain JIP02/86 / ATCC 49511)	https://www.uniprot.org/uniprot/A6GZB9
GX-01_GM001494	43.4	5.8e-92	P74409	UPF0053 protein sll0260	sll0260	Synechocystis sp. (strain PCC 6803 / Kazusa)	https://www.uniprot.org/uniprot/P74409
GX-01_GM001495	85.8	5.6e-170	A5FMX0	GTPase Obg	obg	Flavobacterium johnsoniae (strain ATCC 17061 / DSM 2064 / UW101)	https://www.uniprot.org/uniprot/A5FMX0
GX-01_GM001502	60	4.9e-256	C2M262	Dipeptidyl-peptidase 7	dpp7	Capnocytophaga gingivalis	https://www.uniprot.org/uniprot/C2M262
GX-01_GM001524	51.1	2.6e-122	Q44740	Alcaligin biosynthesis enzyme	alcA	Bordetella bronchiseptica (strain ATCC BAA-588 / NCTC 13252 / RB50)	https://www.uniprot.org/uniprot/Q44740
GX-01_GM001530	64	5.5e-76	A5FMW5	UPF0758 protein Fjoh_0413	Fjoh_0413	Flavobacterium johnsoniae (strain ATCC 17061 / DSM 2064 / UW101)	https://www.uniprot.org/uniprot/A5FMW5
GX-01_GM001531	40.8	1.1e-33	Q47YG8	Lipoprotein-releasing system ATP-binding protein LolD	lolD	Colwellia psychrerythraea (strain 34H / ATCC BAA-681)	https://www.uniprot.org/uniprot/Q47YG8
GX-01_GM001536	44.4	2.2e-94	P45262	Replication-associated recombination protein A	rarA	Haemophilus influenzae (strain ATCC 51907 / DSM 11121 / KW20 / Rd)	https://www.uniprot.org/uniprot/P45262
GX-01_GM001543	92.9	1.5e-62	A5FMY5	30S ribosomal protein S12	rpsL	Flavobacterium johnsoniae (strain ATCC 17061 / DSM 2064 / UW101)	https://www.uniprot.org/uniprot/A5FMY5
GX-01_GM001544	91.8	1.4e-78	A5FMY4	30S ribosomal protein S7	rpsG	Flavobacterium johnsoniae (strain ATCC 17061 / DSM 2064 / UW101)	https://www.uniprot.org/uniprot/A5FMY4
GX-01_GM001545	74.8	2.0e-310	A0M5A0	Elongation factor G	fusA	Gramella forsetii (strain KT0803)	https://www.uniprot.org/uniprot/A0M5A0
GX-01_GM001546	97	1.4e-47	A0M599	30S ribosomal protein S10	rpsJ	Gramella forsetii (strain KT0803)	https://www.uniprot.org/uniprot/A0M599
GX-01_GM001547	91.2	1.6e-104	A5FMY1	50S ribosomal protein L3	rplC	Flavobacterium johnsoniae (strain ATCC 17061 / DSM 2064 / UW101)	https://www.uniprot.org/uniprot/A5FMY1
GX-01_GM001548	90	1.3e-100	A5FMY0	50S ribosomal protein L4	rplD	Flavobacterium johnsoniae (strain ATCC 17061 / DSM 2064 / UW101)	https://www.uniprot.org/uniprot/A5FMY0
GX-01_GM001549	47.8	5.9e-16	B3QY26	50S ribosomal protein L23	rplW	Chloroherpeton thalassium (strain ATCC 35110 / GB-78)	https://www.uniprot.org/uniprot/B3QY26
GX-01_GM001550	93.8	1.6e-146	A6GZ96	50S ribosomal protein L2	rplB	Flavobacterium psychrophilum (strain JIP02/86 / ATCC 49511)	https://www.uniprot.org/uniprot/A6GZ96
GX-01_GM001551	93.5	2.2e-44	A6GZ95	30S ribosomal protein S19	rpsS	Flavobacterium psychrophilum (strain JIP02/86 / ATCC 49511)	https://www.uniprot.org/uniprot/A6GZ95
GX-01_GM001552	95.6	2.8e-67	A5FMZ5	50S ribosomal protein L22	rplV	Flavobacterium johnsoniae (strain ATCC 17061 / DSM 2064 / UW101)	https://www.uniprot.org/uniprot/A5FMZ5
GX-01_GM001553	90.5	2.4e-125	A6GZ93	30S ribosomal protein S3	rpsC	Flavobacterium psychrophilum (strain JIP02/86 / ATCC 49511)	https://www.uniprot.org/uniprot/A6GZ93
GX-01_GM001554	96.5	2.3e-72	A5FMZ3	50S ribosomal protein L16	rplP	Flavobacterium johnsoniae (strain ATCC 17061 / DSM 2064 / UW101)	https://www.uniprot.org/uniprot/A5FMZ3
GX-01_GM001555	90.3	5.7e-23	A6GZ91	50S ribosomal protein L29	rpmC	Flavobacterium psychrophilum (strain JIP02/86 / ATCC 49511)	https://www.uniprot.org/uniprot/A6GZ91
GX-01_GM001556	76.5	1e-30	Q8A485	30S ribosomal protein S17 1	rpsQ1	Bacteroides thetaiotaomicron (strain ATCC 29148 / DSM 2079 / NCTC 10582 / E50 / VPI-5482)	https://www.uniprot.org/uniprot/Q8A485
GX-01_GM001557	99.2	7.8e-61	A5FMZ0	50S ribosomal protein L14	rplN	Flavobacterium johnsoniae (strain ATCC 17061 / DSM 2064 / UW101)	https://www.uniprot.org/uniprot/A5FMZ0
GX-01_GM001558	78.6	7e-39	A5FMY9	50S ribosomal protein L24	rplX	Flavobacterium johnsoniae (strain ATCC 17061 / DSM 2064 / UW101)	https://www.uniprot.org/uniprot/A5FMY9
GX-01_GM001559	94	4.4e-92	A6GZ87	50S ribosomal protein L5	rplE	Flavobacterium psychrophilum (strain JIP02/86 / ATCC 49511)	https://www.uniprot.org/uniprot/A6GZ87
GX-01_GM001560	91	8.5e-41	A5FN08	30S ribosomal protein S14	rpsN	Flavobacterium johnsoniae (strain ATCC 17061 / DSM 2064 / UW101)	https://www.uniprot.org/uniprot/A5FN08
GX-01_GM001561	87.9	1.9e-60	A5FN07	30S ribosomal protein S8	rpsH	Flavobacterium johnsoniae (strain ATCC 17061 / DSM 2064 / UW101)	https://www.uniprot.org/uniprot/A5FN07
GX-01_GM001562	84	2.8e-83	A6GZ84	50S ribosomal protein L6	rplF	Flavobacterium psychrophilum (strain JIP02/86 / ATCC 49511)	https://www.uniprot.org/uniprot/A6GZ84
GX-01_GM001563	61.1	8.6e-33	Q0TMR2	50S ribosomal protein L18	rplR	Clostridium perfringens (strain ATCC 13124 / DSM 756 / JCM 1290 / NCIMB 6125 / NCTC 8237 / Type A)	https://www.uniprot.org/uniprot/Q0TMR2
GX-01_GM001564	93.1	1.5e-86	A6GZ82	30S ribosomal protein S5	rpsE	Flavobacterium psychrophilum (strain JIP02/86 / ATCC 49511)	https://www.uniprot.org/uniprot/A6GZ82
GX-01_GM001565	78.3	2.1e-19	A5FN03	50S ribosomal protein L30	rpmD	Flavobacterium johnsoniae (strain ATCC 17061 / DSM 2064 / UW101)	https://www.uniprot.org/uniprot/A5FN03
GX-01_GM001566	90	2.5e-72	A6GZ80	50S ribosomal protein L15	rplO	Flavobacterium psychrophilum (strain JIP02/86 / ATCC 49511)	https://www.uniprot.org/uniprot/A6GZ80
GX-01_GM001568	97.2	6.8e-33	A5FN00	Translation initiation factor IF-1	infA	Flavobacterium johnsoniae (strain ATCC 17061 / DSM 2064 / UW101)	https://www.uniprot.org/uniprot/A5FN00
GX-01_GM001569	95.2	9.3e-62	A5FN18	30S ribosomal protein S13	rpsM	Flavobacterium johnsoniae (strain ATCC 17061 / DSM 2064 / UW101)	https://www.uniprot.org/uniprot/A5FN18
GX-01_GM001570	92.9	7.8e-64	A5FN17	30S ribosomal protein S11	rpsK	Flavobacterium johnsoniae (strain ATCC 17061 / DSM 2064 / UW101)	https://www.uniprot.org/uniprot/A5FN17
GX-01_GM001571	89.6	1.8e-102	A5FN16	30S ribosomal protein S4	rpsD	Flavobacterium johnsoniae (strain ATCC 17061 / DSM 2064 / UW101)	https://www.uniprot.org/uniprot/A5FN16
GX-01_GM001572	95.8	2.7e-177	A6GZ73	DNA-directed RNA polymerase subunit alpha	rpoA	Flavobacterium psychrophilum (strain JIP02/86 / ATCC 49511)	https://www.uniprot.org/uniprot/A6GZ73
GX-01_GM001573	91.1	2.3e-76	A5FN14	50S ribosomal protein L17	rplQ	Flavobacterium johnsoniae (strain ATCC 17061 / DSM 2064 / UW101)	https://www.uniprot.org/uniprot/A5FN14
GX-01_GM001574	47.6	2.2e-90	Q3A450	Carbamoyl-phosphate synthase small chain	carA	Pelobacter carbinolicus (strain DSM 2380 / NBRC 103641 / GraBd1)	https://www.uniprot.org/uniprot/Q3A450
GX-01_GM001575	89.5	6.9e-221	A5FN12	Enolase	eno	Flavobacterium johnsoniae (strain ATCC 17061 / DSM 2064 / UW101)	https://www.uniprot.org/uniprot/A5FN12
GX-01_GM001582	42.4	3.4e-08	P55614	Uncharacterized protein y4pE/y4sA	NGR_a02070	Sinorhizobium fredii (strain NBRC 101917 / NGR234)	https://www.uniprot.org/uniprot/P55614
GX-01_GM001635	42.7	6e-36	B8DZX0	Endonuclease V	nfi	Dictyoglomus turgidum (strain Z-1310 / DSM 6724)	https://www.uniprot.org/uniprot/B8DZX0
GX-01_GM001636	52.9	7.3e-130	P9WPD4	Citrate synthase 1	gltA2	Mycobacterium tuberculosis (strain CDC 1551 / Oshkosh)	https://www.uniprot.org/uniprot/P9WPD4
GX-01_GM001644	78.5	4.6e-90	A6GZ60	Recombination protein RecR	recR	Flavobacterium psychrophilum (strain JIP02/86 / ATCC 49511)	https://www.uniprot.org/uniprot/A6GZ60
GX-01_GM001647	52.7	7e-93	Q04973	Vi polysaccharide biosynthesis protein VipB/TviC	vipB	Salmonella typhi	https://www.uniprot.org/uniprot/Q04973
GX-01_GM001648	58.4	3.1e-141	Q04972	Vi polysaccharide biosynthesis protein VipA/TviB	vipA	Salmonella typhi	https://www.uniprot.org/uniprot/Q04972
GX-01_GM001649	60.5	1.1e-160	Q96558	UDP-glucose 6-dehydrogenase 1	UGD1	Glycine max	https://www.uniprot.org/uniprot/Q96558
GX-01_GM001650	58.1	1.2e-114	P26391	dTDP-glucose 4,6-dehydratase	rfbB	Salmonella typhimurium (strain LT2 / SGSC1412 / ATCC 700720)	https://www.uniprot.org/uniprot/P26391
GX-01_GM001651	64.4	4.1e-108	P55254	Glucose-1-phosphate thymidylyltransferase	rmlA	Salmonella anatum	https://www.uniprot.org/uniprot/P55254
GX-01_GM001652	59	1.2e-117	P58600	Probable UDP-N-acetylglucosamine 2-epimerase	epsC	Ralstonia solanacearum (strain GMI1000)	https://www.uniprot.org/uniprot/P58600
GX-01_GM001659	65.1	2.5e-120	Q4UM33	UDP-glucose 4-epimerase	capD	Rickettsia felis (strain ATCC VR-1525 / URRWXCal2)	https://www.uniprot.org/uniprot/Q4UM33
GX-01_GM001665	59.5	1.8e-62	Q0P9D0	Undecaprenyl phosphate N,N'-diacetylbacillosamine 1-phosphate transferase	pglC	Campylobacter jejuni subsp. jejuni serotype O:2 (strain ATCC 700819 / NCTC 11168)	https://www.uniprot.org/uniprot/Q0P9D0
GX-01_GM001667	50.5	7.3e-102	Q795J3	Putative pyridoxal phosphate-dependent aminotransferase EpsN	epsN	Bacillus subtilis (strain 168)	https://www.uniprot.org/uniprot/Q795J3
GX-01_GM001668	40.8	7.7e-91	P71052	Probable polysaccharide biosynthesis protein EpsC	epsC	Bacillus subtilis (strain 168)	https://www.uniprot.org/uniprot/P71052
GX-01_GM001674	41.2	3.6e-52	Q50863	O-antigen export system ATP-binding protein RfbB	rfbB	Myxococcus xanthus	https://www.uniprot.org/uniprot/Q50863
GX-01_GM001676	52.2	7.2e-102	Q8Z388	UDP-N-acetylglucosamine 2-epimerase	wecB	Salmonella typhi	https://www.uniprot.org/uniprot/Q8Z388
GX-01_GM001702	41	4.7e-42	B3FN88	UDP-N-acetylgalactosamine-undecaprenyl-phosphate N-acetylgalactosaminephosphotransferase	wecA	Aeromonas hydrophila	https://www.uniprot.org/uniprot/B3FN88
GX-01_GM001706	40.1	1.3e-37	Q8FFY2	Uncharacterized protein YegX	yegX	Escherichia coli O6:H1 (strain CFT073 / ATCC 700928 / UPEC)	https://www.uniprot.org/uniprot/Q8FFY2
GX-01_GM001713	56.9	4.1e-77	P45073	Lipopolysaccharide export system ATP-binding protein LptB	lptB	Haemophilus influenzae (strain ATCC 51907 / DSM 11121 / KW20 / Rd)	https://www.uniprot.org/uniprot/P45073
GX-01_GM001715	41.5	1.2e-56	D0J948	Sec-independent protein translocase protein TatC	tatC	Blattabacterium sp. subsp. Periplaneta americana (strain BPLAN)	https://www.uniprot.org/uniprot/D0J948
GX-01_GM001716	47.1	1.2e-71	O67500	Uncharacterized phosphosugar isomerase aq_1546	aq_1546	Aquifex aeolicus (strain VF5)	https://www.uniprot.org/uniprot/O67500
GX-01_GM001717	40.4	1.5e-114	Q9CL21	ATP-dependent DNA helicase RecQ	recQ	Pasteurella multocida (strain Pm70)	https://www.uniprot.org/uniprot/Q9CL21
GX-01_GM001719	56	1.4e-46	A5FNY2	Shikimate kinase	aroK	Flavobacterium johnsoniae (strain ATCC 17061 / DSM 2064 / UW101)	https://www.uniprot.org/uniprot/A5FNY2
GX-01_GM001736	47.5	2e-68	P46343	PhoH-like protein	phoH	Bacillus subtilis (strain 168)	https://www.uniprot.org/uniprot/P46343
GX-01_GM001738	46.7	2.3e-98	Q7TTP0	Flavohemoprotein	hmp	Bordetella pertussis (strain Tohama I / ATCC BAA-589 / NCTC 13251)	https://www.uniprot.org/uniprot/Q7TTP0
GX-01_GM001739	83.5	1.8e-154	A6GYJ4	Phosphoribosylaminoimidazole-succinocarboxamide synthase	purC	Flavobacterium psychrophilum (strain JIP02/86 / ATCC 49511)	https://www.uniprot.org/uniprot/A6GYJ4
GX-01_GM001756	50.9	9.7e-168	Q59189	DNA topoisomerase 4 subunit B	parE	Borrelia burgdorferi (strain ATCC 35210 / B31 / CIP 102532 / DSM 4680)	https://www.uniprot.org/uniprot/Q59189
GX-01_GM001761	70.2	1.3e-123	A5FE96	tRNA dimethylallyltransferase	miaA	Flavobacterium johnsoniae (strain ATCC 17061 / DSM 2064 / UW101)	https://www.uniprot.org/uniprot/A5FE96
GX-01_GM001762	53.4	1.6e-53	P26839	Virginiamycin A acetyltransferase	vat	Staphylococcus aureus	https://www.uniprot.org/uniprot/P26839
GX-01_GM001765	40.4	2.5e-25	O94903	Pyridoxal phosphate homeostasis protein	PLPBP	Homo sapiens	https://www.uniprot.org/uniprot/O94903
GX-01_GM001770	54.1	6.9e-79	P77851	3-hydroxybutyryl-CoA dehydrogenase	hbd	Thermoanaerobacterium thermosaccharolyticum (strain ATCC 7956 / DSM 571 / NCIB 9385 / NCA 3814)	https://www.uniprot.org/uniprot/P77851
GX-01_GM001773	44	1.2e-115	Q8XWM7	L-aspartate oxidase 1	nadB1	Ralstonia solanacearum (strain GMI1000)	https://www.uniprot.org/uniprot/Q8XWM7
GX-01_GM001774	63.5	1.8e-107	B7KBV9	Quinolinate synthase A	nadA	Cyanothece sp. (strain PCC 7424)	https://www.uniprot.org/uniprot/B7KBV9
GX-01_GM001775	85.9	3.2e-102	A5FEA5	Protein-L-isoaspartate O-methyltransferase	pcm	Flavobacterium johnsoniae (strain ATCC 17061 / DSM 2064 / UW101)	https://www.uniprot.org/uniprot/A5FEA5
GX-01_GM001776	86	1.5e-69	A6H0S6	SsrA-binding protein	smpB	Flavobacterium psychrophilum (strain JIP02/86 / ATCC 49511)	https://www.uniprot.org/uniprot/A6H0S6
GX-01_GM001779	41.9	1.6e-112	Q797A7	Methylthioribose transporter	mtrA	Bacillus subtilis (strain 168)	https://www.uniprot.org/uniprot/Q797A7
GX-01_GM001783	44.2	5.5e-29	P28369	Putative peptide chain release factor homolog	prfH	Escherichia coli (strain K12)	https://www.uniprot.org/uniprot/P28369
GX-01_GM001791	74.2	3.4e-297	Q59677	Methylmalonyl-CoA mutase large subunit	mutB	Porphyromonas gingivalis (strain ATCC BAA-308 / W83)	https://www.uniprot.org/uniprot/Q59677
GX-01_GM001797	52.5	1.6e-55	Q4L6V8	Uridine kinase	udk	Staphylococcus haemolyticus (strain JCSC1435)	https://www.uniprot.org/uniprot/Q4L6V8
GX-01_GM001798	71.6	1.2e-100	A6GZI2	Triosephosphate isomerase	tpiA	Flavobacterium psychrophilum (strain JIP02/86 / ATCC 49511)	https://www.uniprot.org/uniprot/A6GZI2
GX-01_GM001800	66.7	1.7e-126	Q45FN5	Protein TlpB	tlpB	Flavobacterium psychrophilum	https://www.uniprot.org/uniprot/Q45FN5
GX-01_GM001802	43.8	5.8e-53	P0AC14	Dihydropteroate synthase	folP	Escherichia coli O6:H1 (strain CFT073 / ATCC 700928 / UPEC)	https://www.uniprot.org/uniprot/P0AC14
GX-01_GM001806	53.3	2.4e-70	A6LDA7	tRNA pseudouridine synthase A	truA	Parabacteroides distasonis (strain ATCC 8503 / DSM 20701 / CIP 104284 / JCM 5825 / NCTC 11152)	https://www.uniprot.org/uniprot/A6LDA7
GX-01_GM001809	74.5	7.7e-79	A6GZH5	Maf-like protein FP1422	FP1422	Flavobacterium psychrophilum (strain JIP02/86 / ATCC 49511)	https://www.uniprot.org/uniprot/A6GZH5
GX-01_GM001811	40	2.8e-27	Q8Z3G5	3-deoxy-D-manno-octulosonate 8-phosphate phosphatase KdsC	kdsC	Salmonella typhi	https://www.uniprot.org/uniprot/Q8Z3G5
GX-01_GM001815	52	1.4e-40	Q8CSR9	Glutathione peroxidase homolog BsaA	bsaA	Staphylococcus epidermidis (strain ATCC 12228)	https://www.uniprot.org/uniprot/Q8CSR9
GX-01_GM001816	43.8	3.3e-32	P52035	Glutathione peroxidase homolog BsaA	bsaA	Bacillus subtilis (strain 168)	https://www.uniprot.org/uniprot/P52035
GX-01_GM001825	40.9	2.8e-109	A0A0A1GKA2	Carotenoid 3,4-desaturase	crtD	Haloarcula japonica	https://www.uniprot.org/uniprot/A0A0A1GKA2
GX-01_GM001827	46.3	4e-25	P21688	Beta-carotene hydroxylase	crtZ	Pantoea ananas	https://www.uniprot.org/uniprot/P21688
GX-01_GM001835	50.6	8.8e-174	O07631	GTP-binding protein TypA/BipA homolog	typA	Bacillus subtilis (strain 168)	https://www.uniprot.org/uniprot/O07631
GX-01_GM001838	89.2	8.5e-35	A5FA35	30S ribosomal protein S20	rpsT	Flavobacterium johnsoniae (strain ATCC 17061 / DSM 2064 / UW101)	https://www.uniprot.org/uniprot/A5FA35
GX-01_GM001840	83.1	4.7e-248	A6GZF3	Proline--tRNA ligase	proS	Flavobacterium psychrophilum (strain JIP02/86 / ATCC 49511)	https://www.uniprot.org/uniprot/A6GZF3
GX-01_GM001843	85.6	1.3e-219	A5FA30	Ribosomal protein S12 methylthiotransferase RimO	rimO	Flavobacterium johnsoniae (strain ATCC 17061 / DSM 2064 / UW101)	https://www.uniprot.org/uniprot/A5FA30
GX-01_GM001845	63.4	1.1e-191	A6GZG1	Putative cysteine ligase BshC	bshC	Flavobacterium psychrophilum (strain JIP02/86 / ATCC 49511)	https://www.uniprot.org/uniprot/A6GZG1
GX-01_GM001846	91.4	5.2e-67	A6GZG2	Nucleoside diphosphate kinase	ndk	Flavobacterium psychrophilum (strain JIP02/86 / ATCC 49511)	https://www.uniprot.org/uniprot/A6GZG2
GX-01_GM001850	49.5	3e-68	Q5LEW2	Ribosomal protein L11 methyltransferase	prmA	Bacteroides fragilis (strain ATCC 25285 / DSM 2151 / JCM 11019 / NCTC 9343)	https://www.uniprot.org/uniprot/Q5LEW2
GX-01_GM001851	40.6	1.5e-27	A6VCX3	L-methionine sulfoximine/L-methionine sulfone acetyltransferase	PSPA7_5587	Pseudomonas aeruginosa (strain PA7)	https://www.uniprot.org/uniprot/A6VCX3
GX-01_GM001853	64.8	7.3e-207	A6H070	2-succinyl-5-enolpyruvyl-6-hydroxy-3-cyclohexene-1-carboxylate synthase	menD	Flavobacterium psychrophilum (strain JIP02/86 / ATCC 49511)	https://www.uniprot.org/uniprot/A6H070
GX-01_GM001860	59.2	3.6e-154	Q8AA22	Uncharacterized RNA methyltransferase BT_0643	BT_0643	Bacteroides thetaiotaomicron (strain ATCC 29148 / DSM 2079 / NCTC 10582 / E50 / VPI-5482)	https://www.uniprot.org/uniprot/Q8AA22
GX-01_GM001867	65.2	2.4e-146	P49724	Ornithine aminotransferase, mitochondrial	Oat	Drosophila ananassae	https://www.uniprot.org/uniprot/P49724
GX-01_GM001876	82.7	9.2e-299	A0M353	Chaperone protein DnaK	dnaK	Gramella forsetii (strain KT0803)	https://www.uniprot.org/uniprot/A0M353
GX-01_GM001877	51.6	2.5e-30	O58584	RutC family protein PH0854	PH0854	Pyrococcus horikoshii (strain ATCC 700860 / DSM 12428 / JCM 9974 / NBRC 100139 / OT-3)	https://www.uniprot.org/uniprot/O58584
GX-01_GM001885	45.6	3.5e-88	P42982	N-acetyl-alpha-D-glucosaminyl L-malate synthase	bshA	Bacillus subtilis (strain 168)	https://www.uniprot.org/uniprot/P42982
GX-01_GM001910	83.3	1.6e-136	A6H0M8	4-hydroxy-tetrahydrodipicolinate synthase	dapA	Flavobacterium psychrophilum (strain JIP02/86 / ATCC 49511)	https://www.uniprot.org/uniprot/A6H0M8
GX-01_GM001913	44.6	3.4e-89	O35033	Probable coenzyme A biosynthesis bifunctional protein CoaBC	coaBC	Bacillus subtilis (strain 168)	https://www.uniprot.org/uniprot/O35033
GX-01_GM001916	78.5	1.4e-180	A5FE91	Enoyl-[acyl-carrier-protein] reductase [NADH]	fabV	Flavobacterium johnsoniae (strain ATCC 17061 / DSM 2064 / UW101)	https://www.uniprot.org/uniprot/A5FE91
GX-01_GM001918	41.2	3.5e-34	Q64X24	Dephospho-CoA kinase	coaE	Bacteroides fragilis (strain YCH46)	https://www.uniprot.org/uniprot/Q64X24
GX-01_GM001920	51.3	8.4e-64	Q9AE24	Transcriptional regulatory protein RprY	rprY	Bacteroides fragilis (strain YCH46)	https://www.uniprot.org/uniprot/Q9AE24
GX-01_GM001921	44.2	1.1e-49	P67129	UPF0053 inner membrane protein YgdQ	ygdQ	Escherichia coli O157:H7	https://www.uniprot.org/uniprot/P67129
GX-01_GM001925	64.6	6.9e-94	A0M6M4	N-acetylmuramic acid 6-phosphate etherase	murQ	Gramella forsetii (strain KT0803)	https://www.uniprot.org/uniprot/A0M6M4
GX-01_GM001931	46.1	5.4e-75	O50310	Uncharacterized RNA pseudouridine synthase Cpar_0723	Cpar_0723	Chlorobaculum parvum (strain NCIB 8327)	https://www.uniprot.org/uniprot/O50310
GX-01_GM001933	74.1	4.5e-140	A6GXD5	D-alanine--D-alanine ligase	ddl	Flavobacterium psychrophilum (strain JIP02/86 / ATCC 49511)	https://www.uniprot.org/uniprot/A6GXD5
GX-01_GM001934	82.7	1.6e-66	A6GXD6	Phosphopantetheine adenylyltransferase	coaD	Flavobacterium psychrophilum (strain JIP02/86 / ATCC 49511)	https://www.uniprot.org/uniprot/A6GXD6
GX-01_GM001938	46	5.5e-52	Q8KF76	Lipoprotein-releasing system ATP-binding protein LolD 1	lolD1	Chlorobaculum tepidum (strain ATCC 49652 / DSM 12025 / NBRC 103806 / TLS)	https://www.uniprot.org/uniprot/Q8KF76
GX-01_GM001939	50.5	6.7e-20	P96673	Uncharacterized HTH-type transcriptional regulator YdeP	ydeP	Bacillus subtilis (strain 168)	https://www.uniprot.org/uniprot/P96673
GX-01_GM001942	42.2	1.9e-91	Q9Z6C9	ATP-dependent RNA helicase CshA	cshA	Lactobacillus reuteri	https://www.uniprot.org/uniprot/Q9Z6C9
GX-01_GM001944	61.2	2e-64	Q8A1D5	Orotate phosphoribosyltransferase	pyrE	Bacteroides thetaiotaomicron (strain ATCC 29148 / DSM 2079 / NCTC 10582 / E50 / VPI-5482)	https://www.uniprot.org/uniprot/Q8A1D5
GX-01_GM001946	67.4	5e-224	P22106	Asparagine synthetase B [glutamine-hydrolyzing]	asnB	Escherichia coli (strain K12)	https://www.uniprot.org/uniprot/P22106
GX-01_GM001947	56.6	2.8e-202	P05652	DNA gyrase subunit B	gyrB	Bacillus subtilis (strain 168)	https://www.uniprot.org/uniprot/P05652
GX-01_GM001948	81.9	6.8e-146	Q25QU7	Malate dehydrogenase	mdh	Flavobacterium frigidimaris	https://www.uniprot.org/uniprot/Q25QU7
GX-01_GM001950	62.9	8.4e-30	P37584	Probable chaperone CsaA	csaA	Bacillus subtilis (strain 168)	https://www.uniprot.org/uniprot/P37584
GX-01_GM001955	44.5	1.4e-45	O32037	tRNA threonylcarbamoyladenosine dehydratase	tcdA	Bacillus subtilis (strain 168)	https://www.uniprot.org/uniprot/O32037
GX-01_GM001958	78.6	7.3e-188	A6H0H4	Imidazolonepropionase	hutI	Flavobacterium psychrophilum (strain JIP02/86 / ATCC 49511)	https://www.uniprot.org/uniprot/A6H0H4
GX-01_GM001963	47.4	3.4e-18	P76569	Uncharacterized protein YfgD	yfgD	Escherichia coli (strain K12)	https://www.uniprot.org/uniprot/P76569
GX-01_GM001968	41.3	7.8e-92	P25888	ATP-dependent RNA helicase RhlE	rhlE	Escherichia coli (strain K12)	https://www.uniprot.org/uniprot/P25888
GX-01_GM001973	46.4	1.1e-65	P64431	Uncharacterized protein YpfJ	ypfJ	Escherichia coli O157:H7	https://www.uniprot.org/uniprot/P64431
GX-01_GM001979	70.6	2.2e-137	A0M1X3	tRNA N6-adenosine threonylcarbamoyltransferase	tsaD	Gramella forsetii (strain KT0803)	https://www.uniprot.org/uniprot/A0M1X3
GX-01_GM001981	52.2	2.2e-94	Q8A624	ATP-dependent 6-phosphofructokinase 2	pfkA2	Bacteroides thetaiotaomicron (strain ATCC 29148 / DSM 2079 / NCTC 10582 / E50 / VPI-5482)	https://www.uniprot.org/uniprot/Q8A624
GX-01_GM001982	66.5	7.4e-122	B7LQ20	Glyceraldehyde-3-phosphate dehydrogenase	gapA	Escherichia fergusonii (strain ATCC 35469 / DSM 13698 / CDC 0568-73)	https://www.uniprot.org/uniprot/B7LQ20
GX-01_GM001984	51.7	1.9e-30	B2V099	Methylglyoxal synthase	mgsA	Clostridium botulinum (strain Alaska E43 / Type E3)	https://www.uniprot.org/uniprot/B2V099
GX-01_GM001988	62.2	9.4e-71	Q8A1M1	Lipoprotein-releasing system ATP-binding protein LolD	lolD	Bacteroides thetaiotaomicron (strain ATCC 29148 / DSM 2079 / NCTC 10582 / E50 / VPI-5482)	https://www.uniprot.org/uniprot/Q8A1M1
GX-01_GM001996	40.8	8.5e-51	Q8TL28	Ulilysin	MA_3214	Methanosarcina acetivorans (strain ATCC 35395 / DSM 2834 / JCM 12185 / C2A)	https://www.uniprot.org/uniprot/Q8TL28
GX-01_GM002013	53.8	2.8e-158	D9IA43	Cbb3-type cytochrome c oxidase subunit CcoN1	ccoN1	Pseudomonas stutzeri	https://www.uniprot.org/uniprot/D9IA43
GX-01_GM002030	55.7	1.5e-105	P45867	Acyl-CoA dehydrogenase	acdA	Bacillus subtilis (strain 168)	https://www.uniprot.org/uniprot/P45867
GX-01_GM002034	44.8	3.5e-115	P45049	Competence protein ComM	comM	Haemophilus influenzae (strain ATCC 51907 / DSM 11121 / KW20 / Rd)	https://www.uniprot.org/uniprot/P45049
GX-01_GM002037	85.2	1e-177	A6H0W3	Peptide chain release factor 1	prfA	Flavobacterium psychrophilum (strain JIP02/86 / ATCC 49511)	https://www.uniprot.org/uniprot/A6H0W3
GX-01_GM002040	82.7	1.4e-127	A5FHG4	Orotidine 5'-phosphate decarboxylase	pyrF	Flavobacterium johnsoniae (strain ATCC 17061 / DSM 2064 / UW101)	https://www.uniprot.org/uniprot/A5FHG4
GX-01_GM002067	60.1	5.4e-124	P41338	Acetyl-CoA acetyltransferase	ERG10	Saccharomyces cerevisiae (strain ATCC 204508 / S288c)	https://www.uniprot.org/uniprot/P41338
GX-01_GM002069	83.2	5.7e-221	A5FGE0	tRNA modification GTPase MnmE	mnmE	Flavobacterium johnsoniae (strain ATCC 17061 / DSM 2064 / UW101)	https://www.uniprot.org/uniprot/A5FGE0
GX-01_GM002071	42.5	7.6e-38	Q57594	Type-1 restriction enzyme MjaXIP specificity protein	MJ0130	Methanocaldococcus jannaschii (strain ATCC 43067 / DSM 2661 / JAL-1 / JCM 10045 / NBRC 100440)	https://www.uniprot.org/uniprot/Q57594
GX-01_GM002084	56.1	2.7e-39	Q8DJK9	Peptide methionine sulfoxide reductase MsrB	msrB	Thermosynechococcus elongatus (strain BP-1)	https://www.uniprot.org/uniprot/Q8DJK9
GX-01_GM002085	54.3	2.5e-55	Q97Y45	Peptide methionine sulfoxide reductase MsrA	msrA	Sulfolobus solfataricus (strain ATCC 35092 / DSM 1617 / JCM 11322 / P2)	https://www.uniprot.org/uniprot/Q97Y45
GX-01_GM002088	53.5	2e-242	Q64T65	Phenylalanine--tRNA ligase beta subunit	pheT	Bacteroides fragilis (strain YCH46)	https://www.uniprot.org/uniprot/Q64T65
GX-01_GM002090	53.3	2.6e-127	Q1ZXQ1	Fumarylacetoacetase	fah	Dictyostelium discoideum	https://www.uniprot.org/uniprot/Q1ZXQ1
GX-01_GM002091	86.1	2.3e-216	A6GXG2	Serine hydroxymethyltransferase	glyA	Flavobacterium psychrophilum (strain JIP02/86 / ATCC 49511)	https://www.uniprot.org/uniprot/A6GXG2
GX-01_GM002092	83.5	4.1e-171	A6GXP5	Chorismate synthase	aroC	Flavobacterium psychrophilum (strain JIP02/86 / ATCC 49511)	https://www.uniprot.org/uniprot/A6GXP5
GX-01_GM002093	41.5	1.9e-82	B5ZXG4	C4-dicarboxylate transport protein	dctA	Rhizobium leguminosarum bv. trifolii (strain WSM2304)	https://www.uniprot.org/uniprot/B5ZXG4
GX-01_GM002099	64.3	6.4e-42	P45871	Uncharacterized protein YwkD	ywkD	Bacillus subtilis (strain 168)	https://www.uniprot.org/uniprot/P45871
GX-01_GM002100	75	0	B3PC77	Catalase-peroxidase 1	katG1	Cellvibrio japonicus (strain Ueda107)	https://www.uniprot.org/uniprot/B3PC77
GX-01_GM002104	47.2	2.4e-250	Q5HQW9	UvrABC system protein A	uvrA	Staphylococcus epidermidis (strain ATCC 35984 / RP62A)	https://www.uniprot.org/uniprot/Q5HQW9
GX-01_GM002111	43.8	2e-14	P59527	Thioredoxin	trxA	Buchnera aphidicola subsp. Baizongia pistaciae (strain Bp)	https://www.uniprot.org/uniprot/P59527
GX-01_GM002116	42.1	2.8e-63	P49748	Very long-chain specific acyl-CoA dehydrogenase, mitochondrial	ACADVL	Homo sapiens	https://www.uniprot.org/uniprot/P49748
GX-01_GM002118	53.4	1.2e-107	O32177	3-ketoacyl-CoA thiolase	fadA	Bacillus subtilis (strain 168)	https://www.uniprot.org/uniprot/O32177
GX-01_GM002119	48.6	7.7e-210	O32178	Probable 3-hydroxyacyl-CoA dehydrogenase	fadN	Bacillus subtilis (strain 168)	https://www.uniprot.org/uniprot/O32178
GX-01_GM002125	80.5	7.6e-190	A6H0G9	tRNA-specific 2-thiouridylase MnmA	mnmA	Flavobacterium psychrophilum (strain JIP02/86 / ATCC 49511)	https://www.uniprot.org/uniprot/A6H0G9
GX-01_GM002128	59.3	4.1e-71	Q8A3H9	NAD-dependent protein deacylase	cobB	Bacteroides thetaiotaomicron (strain ATCC 29148 / DSM 2079 / NCTC 10582 / E50 / VPI-5482)	https://www.uniprot.org/uniprot/Q8A3H9
GX-01_GM002132	40.7	4.9e-15	Q9V159	HTH-type transcriptional regulator LrpA	lrpA	Pyrococcus abyssi (strain GE5 / Orsay)	https://www.uniprot.org/uniprot/Q9V159
GX-01_GM002136	60.1	0	Q5KUG0	Fused isobutyryl-CoA mutase	icmF	Geobacillus kaustophilus (strain HTA426)	https://www.uniprot.org/uniprot/Q5KUG0
GX-01_GM002140	87.8	5.4e-265	A6H0T6	GMP synthase [glutamine-hydrolyzing]	guaA	Flavobacterium psychrophilum (strain JIP02/86 / ATCC 49511)	https://www.uniprot.org/uniprot/A6H0T6
GX-01_GM002144	48.6	1.8e-12	P0AD41	Uncharacterized protein YpeB	ypeB	Escherichia coli O157:H7	https://www.uniprot.org/uniprot/P0AD41
GX-01_GM002145	88.2	3.4e-278	A6H0U1	CTP synthase	pyrG	Flavobacterium psychrophilum (strain JIP02/86 / ATCC 49511)	https://www.uniprot.org/uniprot/A6H0U1
GX-01_GM002149	44.3	1e-90	P0ADT7	Putative acid--amine ligase YgiC	ygiC	Escherichia coli O157:H7	https://www.uniprot.org/uniprot/P0ADT7
GX-01_GM002152	45	4e-26	Q6T1W8	TDP-4-oxo-6-deoxy-alpha-D-glucose-3,4-oxoisomerase	fdtA	Aneurinibacillus thermoaerophilus	https://www.uniprot.org/uniprot/Q6T1W8
GX-01_GM002155	87.9	3.2e-75	A5FE53	Ribosomal RNA large subunit methyltransferase H	rlmH	Flavobacterium johnsoniae (strain ATCC 17061 / DSM 2064 / UW101)	https://www.uniprot.org/uniprot/A5FE53
GX-01_GM002156	76.8	2.7e-151	A6H0L5	Dihydroorotate dehydrogenase (quinone)	pyrD	Flavobacterium psychrophilum (strain JIP02/86 / ATCC 49511)	https://www.uniprot.org/uniprot/A6H0L5
GX-01_GM002163	41.3	2.4e-154	Q8DEW2	Polyphosphate kinase	ppk	Vibrio vulnificus (strain CMCP6)	https://www.uniprot.org/uniprot/Q8DEW2
GX-01_GM002166	56.3	3.5e-112	Q6T1W6	dTDP-3-amino-3,6-dideoxy-alpha-D-galactopyranose transaminase	fdtB	Aneurinibacillus thermoaerophilus	https://www.uniprot.org/uniprot/Q6T1W6
GX-01_GM002170	53.5	2.1e-68	P51831	3-oxoacyl-[acyl-carrier-protein] reductase FabG	fabG	Bacillus subtilis (strain 168)	https://www.uniprot.org/uniprot/P51831
GX-01_GM002172	67.1	6.2e-97	A6GXJ8	UPF0246 protein FP0718	FP0718	Flavobacterium psychrophilum (strain JIP02/86 / ATCC 49511)	https://www.uniprot.org/uniprot/A6GXJ8
GX-01_GM002179	55.7	8.5e-179	P45127	Energy-dependent translational throttle protein EttA	ettA	Haemophilus influenzae (strain ATCC 51907 / DSM 11121 / KW20 / Rd)	https://www.uniprot.org/uniprot/P45127
GX-01_GM002185	54	1.1e-31	P0A0V4	Organic hydroperoxide resistance protein	ohr	Xanthomonas axonopodis pv. citri (strain 306)	https://www.uniprot.org/uniprot/P0A0V4
GX-01_GM002190	56	2.8e-157	Q9KRQ1	Catalase	VC_1585	Vibrio cholerae serotype O1 (strain ATCC 39315 / El Tor Inaba N16961)	https://www.uniprot.org/uniprot/Q9KRQ1
GX-01_GM002191	73.4	3.5e-221	P45737	Catalase	katA	Bacteroides fragilis (strain YCH46)	https://www.uniprot.org/uniprot/P45737
GX-01_GM002192	40.8	2.5e-38	P21762	Alkyl hydroperoxide reductase C	ahpC	Helicobacter pylori (strain ATCC 700392 / 26695)	https://www.uniprot.org/uniprot/P21762
GX-01_GM002193	40.3	4.9e-08	Q1ZXE0	Putative thioredoxin-4	trxD	Dictyostelium discoideum	https://www.uniprot.org/uniprot/Q1ZXE0
GX-01_GM002196	60.2	9.1e-50	Q8KED5	Thiol peroxidase	tpx	Chlorobaculum tepidum (strain ATCC 49652 / DSM 12025 / NBRC 103806 / TLS)	https://www.uniprot.org/uniprot/Q8KED5
GX-01_GM002198	41.4	1.3e-135	Q8KBK0	DNA translocase FtsK	ftsK	Chlorobaculum tepidum (strain ATCC 49652 / DSM 12025 / NBRC 103806 / TLS)	https://www.uniprot.org/uniprot/Q8KBK0
GX-01_GM002201	55.7	1.4e-113	Q11WK6	Riboflavin biosynthesis protein RibBA	ribBA	Cytophaga hutchinsonii (strain ATCC 33406 / NCIMB 9469)	https://www.uniprot.org/uniprot/Q11WK6
GX-01_GM002223	49.5	3.1e-57	Q58E95	Adenylyltransferase and sulfurtransferase MOCS3	mocs3	Xenopus laevis	https://www.uniprot.org/uniprot/Q58E95
GX-01_GM002225	42.4	1.5e-25	P0A5K7	Cyclic pyranopterin monophosphate synthase 2	moaC2	Mycobacterium bovis (strain ATCC BAA-935 / AF2122/97)	https://www.uniprot.org/uniprot/P0A5K7
GX-01_GM002226	46.6	3.9e-61	Q9NZB8	Molybdenum cofactor biosynthesis protein 1	MOCS1	Homo sapiens	https://www.uniprot.org/uniprot/Q9NZB8
GX-01_GM002228	49.8	6.8e-69	Q9RA45	Probable nitrate/nitrite antiporter NarK2	narK2	Thermus thermophilus	https://www.uniprot.org/uniprot/Q9RA45
GX-01_GM002230	44.5	1.2e-169	P42434	Assimilatory nitrate reductase catalytic subunit	nasC	Bacillus subtilis (strain 168)	https://www.uniprot.org/uniprot/P42434
GX-01_GM002238	49.4	2.9e-65	Q51664	Protein NorQ	norQ	Paracoccus denitrificans (strain Pd 1222)	https://www.uniprot.org/uniprot/Q51664
GX-01_GM002241	62.1	7.6e-112	Q02219	Copper-containing nitrite reductase	aniA	Neisseria gonorrhoeae	https://www.uniprot.org/uniprot/Q02219
GX-01_GM002243	45.3	3.3e-109	P98008	Nitric oxide reductase subunit B	norB	Pseudomonas stutzeri	https://www.uniprot.org/uniprot/P98008
GX-01_GM002244	40.8	1.4e-23	Q52527	Nitric oxide reductase subunit C	norC	Pseudomonas stutzeri	https://www.uniprot.org/uniprot/Q52527
GX-01_GM002251	45.2	3.4e-69	P9WP50	Putative cystathionine beta-synthase MT1108	cbs	Mycobacterium tuberculosis (strain CDC 1551 / Oshkosh)	https://www.uniprot.org/uniprot/P9WP50
GX-01_GM002252	46.6	1e-178	O07834	Dipeptidyl aminopeptidase BI	dapb1	Pseudoxanthomonas mexicana	https://www.uniprot.org/uniprot/O07834
GX-01_GM002253	75.5	2.1e-41	A0M2C1	Nucleoid-associated protein GFO_1796	GFO_1796	Gramella forsetii (strain KT0803)	https://www.uniprot.org/uniprot/A0M2C1
GX-01_GM002257	41.5	4.7e-142	Q55681	ATP-dependent DNA helicase RecG	recG	Synechocystis sp. (strain PCC 6803 / Kazusa)	https://www.uniprot.org/uniprot/Q55681
GX-01_GM002259	55.9	6e-182	O31716	Uncharacterized ABC transporter ATP-binding protein YkpA	ykpA	Bacillus subtilis (strain 168)	https://www.uniprot.org/uniprot/O31716
GX-01_GM002267	83.6	0	A6GXA1	Probable potassium transport system protein kup	kup	Flavobacterium psychrophilum (strain JIP02/86 / ATCC 49511)	https://www.uniprot.org/uniprot/A6GXA1
GX-01_GM002273	56.4	3.5e-205	A0LG91	Acetyl-coenzyme A synthetase	acsA	Syntrophobacter fumaroxidans (strain DSM 10017 / MPOB)	https://www.uniprot.org/uniprot/A0LG91
GX-01_GM002278	42.5	3.5e-44	O31727	Pyridoxal phosphate homeostasis protein	ylmE	Bacillus subtilis (strain 168)	https://www.uniprot.org/uniprot/O31727
GX-01_GM002288	41.6	7.8e-112	P15288	Cytosol non-specific dipeptidase	pepD	Escherichia coli (strain K12)	https://www.uniprot.org/uniprot/P15288
GX-01_GM002289	41.8	8.7e-66	P37941	2-oxoisovalerate dehydrogenase subunit beta	bfmBAB	Bacillus subtilis (strain 168)	https://www.uniprot.org/uniprot/P37941
GX-01_GM002291	50.8	3.3e-10	Q97BW9	Protein translation factor SUI1 homolog	TV0336	Thermoplasma volcanium (strain ATCC 51530 / DSM 4299 / JCM 9571 / NBRC 15438 / GSS1)	https://www.uniprot.org/uniprot/Q97BW9
GX-01_GM002298	72.9	2.1e-94	A5FFT1	Uracil-DNA glycosylase	ung	Flavobacterium johnsoniae (strain ATCC 17061 / DSM 2064 / UW101)	https://www.uniprot.org/uniprot/A5FFT1
GX-01_GM002304	42.7	1.7e-24	P40761	Uncharacterized protein YuxK	yuxK	Bacillus subtilis (strain 168)	https://www.uniprot.org/uniprot/P40761
GX-01_GM002307	53.1	1.5e-59	O34557	Ribulose-phosphate 3-epimerase	rpe	Bacillus subtilis (strain 168)	https://www.uniprot.org/uniprot/O34557
GX-01_GM002311	43.8	1e-24	Q9I3A4	Putative esterase PA1618	PA1618	Pseudomonas aeruginosa (strain ATCC 15692 / DSM 22644 / CIP 104116 / JCM 14847 / LMG 12228 / 1C / PRS 101 / PAO1)	https://www.uniprot.org/uniprot/Q9I3A4
GX-01_GM002313	59.7	8e-165	Q9KGN8	Inosine-5'-monophosphate dehydrogenase	guaB	Bacillus halodurans (strain ATCC BAA-125 / DSM 18197 / FERM 7344 / JCM 9153 / C-125)	https://www.uniprot.org/uniprot/Q9KGN8
GX-01_GM002320	40.2	3e-20	Q74EB5	UPF0225 protein GSU1048	GSU1048	Geobacter sulfurreducens (strain ATCC 51573 / DSM 12127 / PCA)	https://www.uniprot.org/uniprot/Q74EB5
GX-01_GM002321	46.5	1.4e-64	P0AAT4	Miniconductance mechanosensitive channel YbdG	ybdG	Escherichia coli (strain K12)	https://www.uniprot.org/uniprot/P0AAT4
GX-01_GM002329	41.2	8.6e-09	P00208	Ferredoxin	fdx	Allochromatium vinosum (strain ATCC 17899 / DSM 180 / NBRC 103801 / NCIMB 10441 / D)	https://www.uniprot.org/uniprot/P00208
GX-01_GM002331	79.2	8.8e-162	A6GXC2	Phosphoserine aminotransferase	serC	Flavobacterium psychrophilum (strain JIP02/86 / ATCC 49511)	https://www.uniprot.org/uniprot/A6GXC2
GX-01_GM002334	40	3.1e-115	O52177	GTP pyrophosphokinase	relA	Myxococcus xanthus	https://www.uniprot.org/uniprot/O52177
GX-01_GM002345	58.7	6.6e-248	P15623	Glutamine synthetase	glnA	Bacteroides fragilis (strain YCH46)	https://www.uniprot.org/uniprot/P15623
GX-01_GM002360	79.4	3.1e-100	A5FHM7	GTP cyclohydrolase 1	folE	Flavobacterium johnsoniae (strain ATCC 17061 / DSM 2064 / UW101)	https://www.uniprot.org/uniprot/A5FHM7
GX-01_GM002361	67.3	4.3e-203	A5FHM5	Cysteine--tRNA ligase	cysS	Flavobacterium johnsoniae (strain ATCC 17061 / DSM 2064 / UW101)	https://www.uniprot.org/uniprot/A5FHM5
GX-01_GM002362	67.7	8.5e-23	C1D6H9	Putative membrane protein insertion efficiency factor	LHK_03237	Laribacter hongkongensis (strain HLHK9)	https://www.uniprot.org/uniprot/C1D6H9
GX-01_GM002366	40.1	5.3e-50	P32166	1,4-dihydroxy-2-naphthoate octaprenyltransferase	menA	Escherichia coli (strain K12)	https://www.uniprot.org/uniprot/P32166
GX-01_GM002367	63.3	3.9e-92	P9WNP4	1,4-dihydroxy-2-naphthoyl-CoA synthase	menB	Mycobacterium tuberculosis (strain CDC 1551 / Oshkosh)	https://www.uniprot.org/uniprot/P9WNP4
GX-01_GM002370	61.7	8.8e-149	Q5KZ39	Peptidase T	pepT	Geobacillus kaustophilus (strain HTA426)	https://www.uniprot.org/uniprot/Q5KZ39
GX-01_GM002376	41.3	4.5e-43	P50059	Superoxide dismutase [Mn] 2	sodA2	Leptolyngbya boryana	https://www.uniprot.org/uniprot/P50059
GX-01_GM002378	55.6	9.6e-62	Q11Y69	Phosphatidylserine decarboxylase proenzyme	psd	Cytophaga hutchinsonii (strain ATCC 33406 / NCIMB 9469)	https://www.uniprot.org/uniprot/Q11Y69
GX-01_GM002379	42	5.3e-22	P76091	Uncharacterized protein YnbB	ynbB	Escherichia coli (strain K12)	https://www.uniprot.org/uniprot/P76091
GX-01_GM002381	59.5	1.1e-211	A6LD25	ATP-dependent zinc metalloprotease FtsH	ftsH	Parabacteroides distasonis (strain ATCC 8503 / DSM 20701 / CIP 104284 / JCM 5825 / NCTC 11152)	https://www.uniprot.org/uniprot/A6LD25
GX-01_GM002382	41.2	1.4e-14	P54457	Ribosomal silencing factor RsfS	rsfS	Bacillus subtilis (strain 168)	https://www.uniprot.org/uniprot/P54457
GX-01_GM002387	52.3	1.7e-132	O05940	Dihydrolipoyl dehydrogenase	lpdA	Rhizobium etli (strain CFN 42 / ATCC 51251)	https://www.uniprot.org/uniprot/O05940
GX-01_GM002388	43.4	2e-72	P50401	Exoglucanase A	cbhA	Cellulomonas fimi (strain ATCC 484 / DSM 20113 / JCM 1341 / NBRC 15513 / NCIMB 8980 / NCTC 7547)	https://www.uniprot.org/uniprot/P50401
GX-01_GM002395	49.8	7.8e-69	Q1IKD0	2-dehydro-3-deoxyphosphooctonate aldolase	kdsA	Koribacter versatilis (strain Ellin345)	https://www.uniprot.org/uniprot/Q1IKD0
GX-01_GM002396	56.5	1.5e-71	Q8Z1V3	23S rRNA pseudouridine(2604) synthase	rluF	Salmonella typhi	https://www.uniprot.org/uniprot/Q8Z1V3
GX-01_GM002400	64.3	9.3e-120	A5FNE6	Tetraacyldisaccharide 4'-kinase	lpxK	Flavobacterium johnsoniae (strain ATCC 17061 / DSM 2064 / UW101)	https://www.uniprot.org/uniprot/A5FNE6
GX-01_GM002401	48.7	1.3e-71	P77834	Purine nucleoside phosphorylase 1	punA	Geobacillus stearothermophilus	https://www.uniprot.org/uniprot/P77834
GX-01_GM002403	48.4	6.2e-116	P39616	Putative aldehyde dehydrogenase YwdH	ywdH	Bacillus subtilis (strain 168)	https://www.uniprot.org/uniprot/P39616
GX-01_GM002405	86	5.5e-131	A5FAQ5	3-methyl-2-oxobutanoate hydroxymethyltransferase	panB	Flavobacterium johnsoniae (strain ATCC 17061 / DSM 2064 / UW101)	https://www.uniprot.org/uniprot/A5FAQ5
GX-01_GM002406	58.9	2.3e-36	A5FKC3	Large-conductance mechanosensitive channel	mscL	Flavobacterium johnsoniae (strain ATCC 17061 / DSM 2064 / UW101)	https://www.uniprot.org/uniprot/A5FKC3
GX-01_GM002408	60.5	1.5e-64	A6L1E7	Thymidine kinase	tdk	Bacteroides vulgatus (strain ATCC 8482 / DSM 1447 / JCM 5826 / NBRC 14291 / NCTC 11154)	https://www.uniprot.org/uniprot/A6L1E7
GX-01_GM002411	52.7	6.6e-58	P74038	Ribosomal RNA small subunit methyltransferase I	rsmI	Synechocystis sp. (strain PCC 6803 / Kazusa)	https://www.uniprot.org/uniprot/P74038
GX-01_GM002424	46.5	1.5e-115	P71349	L-serine dehydratase	sdaA	Haemophilus influenzae (strain ATCC 51907 / DSM 11121 / KW20 / Rd)	https://www.uniprot.org/uniprot/P71349
GX-01_GM002434	90.7	9.2e-204	A5FHX8	Succinate--CoA ligase [ADP-forming] subunit beta	sucC	Flavobacterium johnsoniae (strain ATCC 17061 / DSM 2064 / UW101)	https://www.uniprot.org/uniprot/A5FHX8
GX-01_GM002437	72.9	1e-66	A5FFL9	Adenine phosphoribosyltransferase	apt	Flavobacterium johnsoniae (strain ATCC 17061 / DSM 2064 / UW101)	https://www.uniprot.org/uniprot/A5FFL9
GX-01_GM002438	54	5.6e-292	Q890X9	UvrABC system protein A	uvrA	Clostridium tetani (strain Massachusetts / E88)	https://www.uniprot.org/uniprot/Q890X9
GX-01_GM002451	51.7	3e-94	P17721	Glyceraldehyde-3-phosphate dehydrogenase	gap	Thermotoga maritima (strain ATCC 43589 / MSB8 / DSM 3109 / JCM 10099)	https://www.uniprot.org/uniprot/P17721
GX-01_GM002452	85.5	2.6e-147	A6GZL9	Lipoyl synthase	lipA	Flavobacterium psychrophilum (strain JIP02/86 / ATCC 49511)	https://www.uniprot.org/uniprot/A6GZL9
GX-01_GM002454	44.3	4.8e-41	Q7XUS2	Anthranilate synthase beta subunit 1, chloroplastic	ASB1	Oryza sativa subsp. japonica	https://www.uniprot.org/uniprot/Q7XUS2
GX-01_GM002455	75.1	5.1e-139	A6GWZ4	Anthranilate phosphoribosyltransferase	trpD	Flavobacterium psychrophilum (strain JIP02/86 / ATCC 49511)	https://www.uniprot.org/uniprot/A6GWZ4
GX-01_GM002456	52.3	6.7e-62	Q8AAD6	Indole-3-glycerol phosphate synthase	trpC	Bacteroides thetaiotaomicron (strain ATCC 29148 / DSM 2079 / NCTC 10582 / E50 / VPI-5482)	https://www.uniprot.org/uniprot/Q8AAD6
GX-01_GM002457	40.7	6.8e-36	A6L9J9	N-(5'-phosphoribosyl)anthranilate isomerase	trpF	Parabacteroides distasonis (strain ATCC 8503 / DSM 20701 / CIP 104284 / JCM 5825 / NCTC 11152)	https://www.uniprot.org/uniprot/A6L9J9
GX-01_GM002458	67.3	1.9e-156	A6L9K4	Tryptophan synthase beta chain	trpB	Parabacteroides distasonis (strain ATCC 8503 / DSM 20701 / CIP 104284 / JCM 5825 / NCTC 11152)	https://www.uniprot.org/uniprot/A6L9K4
GX-01_GM002459	74.2	5.3e-104	A6GWZ0	Tryptophan synthase alpha chain	trpA	Flavobacterium psychrophilum (strain JIP02/86 / ATCC 49511)	https://www.uniprot.org/uniprot/A6GWZ0
GX-01_GM002461	42	1.5e-31	Q8K9X3	Dihydrofolate synthase/folylpolyglutamate synthase	folC	Buchnera aphidicola subsp. Schizaphis graminum (strain Sg)	https://www.uniprot.org/uniprot/Q8K9X3
GX-01_GM002471	76.1	1.6e-301	A6H0N9	DNA ligase	ligA	Flavobacterium psychrophilum (strain JIP02/86 / ATCC 49511)	https://www.uniprot.org/uniprot/A6H0N9
GX-01_GM002473	84.2	2.2e-65	A5FE75	50S ribosomal protein L9	rplI	Flavobacterium johnsoniae (strain ATCC 17061 / DSM 2064 / UW101)	https://www.uniprot.org/uniprot/A5FE75
GX-01_GM002474	98	1.2e-48	A5FE76	30S ribosomal protein S18	rpsR	Flavobacterium johnsoniae (strain ATCC 17061 / DSM 2064 / UW101)	https://www.uniprot.org/uniprot/A5FE76
GX-01_GM002475	81.4	1.2e-47	A6H0P3	30S ribosomal protein S6	rpsF	Flavobacterium psychrophilum (strain JIP02/86 / ATCC 49511)	https://www.uniprot.org/uniprot/A6H0P3
GX-01_GM002477	40.5	5.5e-102	Q9Z6Y2	Primosomal protein N'	priA	Chlamydia pneumoniae	https://www.uniprot.org/uniprot/Q9Z6Y2
GX-01_GM002480	43.3	2.1e-56	Q9ZU32	Nicotinate-nucleotide pyrophosphorylase [carboxylating], chloroplastic	QPT	Arabidopsis thaliana	https://www.uniprot.org/uniprot/Q9ZU32
GX-01_GM002485	52.5	3.3e-90	O67716	Aspartate-semialdehyde dehydrogenase	asd	Aquifex aeolicus (strain VF5)	https://www.uniprot.org/uniprot/O67716
GX-01_GM002492	40.4	9.8e-40	P45103	Uncharacterized protein HI_1198	HI_1198	Haemophilus influenzae (strain ATCC 51907 / DSM 11121 / KW20 / Rd)	https://www.uniprot.org/uniprot/P45103
GX-01_GM002493	46.9	3e-86	O67695	Peptide chain release factor 2	prfB	Aquifex aeolicus (strain VF5)	https://www.uniprot.org/uniprot/O67695
GX-01_GM002494	44.6	4.4e-62	O07051	L-allo-threonine aldolase	ltaA	Aeromonas jandaei	https://www.uniprot.org/uniprot/O07051
GX-01_GM002495	50.5	1.6e-95	P29937	Protein CobW	cobW	Pseudomonas denitrificans	https://www.uniprot.org/uniprot/P29937
GX-01_GM002496	44	6.9e-306	Q9HZQ3	Aerobic cobaltochelatase subunit CobN	cobN	Pseudomonas aeruginosa (strain ATCC 15692 / DSM 22644 / CIP 104116 / JCM 14847 / LMG 12228 / 1C / PRS 101 / PAO1)	https://www.uniprot.org/uniprot/Q9HZQ3
GX-01_GM002501	43.6	2e-66	P9WPR2	Uncharacterized protein MT2916	MT2916	Mycobacterium tuberculosis (strain CDC 1551 / Oshkosh)	https://www.uniprot.org/uniprot/P9WPR2
GX-01_GM002503	48.3	6.6e-76	C5DAN8	Cobalt-precorrin-5B C(1)-methyltransferase	cbiD	Geobacillus sp. (strain WCH70)	https://www.uniprot.org/uniprot/C5DAN8
GX-01_GM002505	47.2	9.6e-59	Q58973	Cobalt-precorrin-4 C(11)-methyltransferase	cbiF	Methanocaldococcus jannaschii (strain ATCC 43067 / DSM 2661 / JAL-1 / JCM 10045 / NBRC 100440)	https://www.uniprot.org/uniprot/Q58973
GX-01_GM002507	41.7	1.4e-41	Q92PC8	5,6-dimethylbenzimidazole synthase	bluB	Rhizobium meliloti (strain 1021)	https://www.uniprot.org/uniprot/Q92PC8
GX-01_GM002508	44.7	1e-52	O87689	Cobalt-factor III methyltransferase	cbiH60	Bacillus megaterium	https://www.uniprot.org/uniprot/O87689
GX-01_GM002511	41	9.7e-40	O34744	Uroporphyrinogen-III C-methyltransferase	sumT	Bacillus subtilis (strain 168)	https://www.uniprot.org/uniprot/O34744
GX-01_GM002515	42.8	1.3e-59	Q8XLK2	Cobalamin biosynthesis protein CobD	cobD	Clostridium perfringens (strain 13 / Type A)	https://www.uniprot.org/uniprot/Q8XLK2
GX-01_GM002517	62.1	9.5e-174	A6LBQ5	Cobyric acid synthase	cobQ	Parabacteroides distasonis (strain ATCC 8503 / DSM 20701 / CIP 104284 / JCM 5825 / NCTC 11152)	https://www.uniprot.org/uniprot/A6LBQ5
GX-01_GM002529	48.3	5.7e-42	Q6U1I3	dTDP-4-amino-4,6-dideoxy-D-glucose transaminase	vioA	Shigella dysenteriae	https://www.uniprot.org/uniprot/Q6U1I3
GX-01_GM002538	48.1	9.6e-36	O34814	Cell division ATP-binding protein FtsE	ftsE	Bacillus subtilis (strain 168)	https://www.uniprot.org/uniprot/O34814
GX-01_GM002549	53.2	5.1e-55	O66105	Probable peptidyl-prolyl cis-trans isomerase	ppiB	Treponema pallidum (strain Nichols)	https://www.uniprot.org/uniprot/O66105
GX-01_GM002550	41.9	5.1e-160	B2RJX3	Prolyl tripeptidyl peptidase	ptpA	Porphyromonas gingivalis (strain ATCC 33277 / DSM 20709 / CIP 103683 / JCM 12257 / NCTC 11834 / 2561)	https://www.uniprot.org/uniprot/B2RJX3
GX-01_GM002552	52.4	4e-129	P52992	Dihydrolipoyl dehydrogenase	odhL	Cupriavidus necator (strain ATCC 17699 / H16 / DSM 428 / Stanier 337)	https://www.uniprot.org/uniprot/P52992
GX-01_GM002553	91.3	1e-111	A6GYG9	Probable transaldolase	tal	Flavobacterium psychrophilum (strain JIP02/86 / ATCC 49511)	https://www.uniprot.org/uniprot/A6GYG9
GX-01_GM002556	40.2	1.2e-42	Q84WV9	Glutaminyl-peptide cyclotransferase	QCT	Arabidopsis thaliana	https://www.uniprot.org/uniprot/Q84WV9
GX-01_GM002559	59	1.7e-145	Q54J34	Adenylosuccinate lyase	purB	Dictyostelium discoideum	https://www.uniprot.org/uniprot/Q54J34
GX-01_GM002567	47.7	9.1e-124	Q8RBH4	Histidine ammonia-lyase	hutH	Caldanaerobacter subterraneus subsp. tengcongensis (strain DSM 15242 / JCM 11007 / NBRC 100824 / MB4)	https://www.uniprot.org/uniprot/Q8RBH4
GX-01_GM002568	86.1	5.3e-182	A6GXW3	Aminomethyltransferase	gcvT	Flavobacterium psychrophilum (strain JIP02/86 / ATCC 49511)	https://www.uniprot.org/uniprot/A6GXW3
GX-01_GM002573	51.4	5e-49	Q97Y45	Peptide methionine sulfoxide reductase MsrA	msrA	Sulfolobus solfataricus (strain ATCC 35092 / DSM 1617 / JCM 11322 / P2)	https://www.uniprot.org/uniprot/Q97Y45
GX-01_GM002574	53.8	7.6e-38	O26807	Peptide methionine sulfoxide reductase MsrB	msrB	Methanothermobacter thermautotrophicus (strain ATCC 29096 / DSM 1053 / JCM 10044 / NBRC 100330 / Delta H)	https://www.uniprot.org/uniprot/O26807
GX-01_GM002579	43.1	2.9e-31	P45173	Uncharacterized protein HI_1349	HI_1349	Haemophilus influenzae (strain ATCC 51907 / DSM 11121 / KW20 / Rd)	https://www.uniprot.org/uniprot/P45173
GX-01_GM002581	71.9	0	A0M5I5	Valine--tRNA ligase	valS	Gramella forsetii (strain KT0803)	https://www.uniprot.org/uniprot/A0M5I5
GX-01_GM002583	79.7	1.5e-108	A6GYA2	3-deoxy-manno-octulosonate cytidylyltransferase	kdsB	Flavobacterium psychrophilum (strain JIP02/86 / ATCC 49511)	https://www.uniprot.org/uniprot/A6GYA2
GX-01_GM002587	86.9	1.2e-118	A5FGS7	Probable transcriptional regulatory protein Fjoh_2560	Fjoh_2560	Flavobacterium johnsoniae (strain ATCC 17061 / DSM 2064 / UW101)	https://www.uniprot.org/uniprot/A5FGS7
GX-01_GM002592	88.3	0	A5FP01	Threonine--tRNA ligase	thrS	Flavobacterium johnsoniae (strain ATCC 17061 / DSM 2064 / UW101)	https://www.uniprot.org/uniprot/A5FP01
GX-01_GM002593	70.4	3.2e-49	A6L9S3	Translation initiation factor IF-3	infC	Parabacteroides distasonis (strain ATCC 8503 / DSM 20701 / CIP 104284 / JCM 5825 / NCTC 11152)	https://www.uniprot.org/uniprot/A6L9S3
GX-01_GM002594	92.3	3.9e-27	A6GY20	50S ribosomal protein L35	rpmI	Flavobacterium psychrophilum (strain JIP02/86 / ATCC 49511)	https://www.uniprot.org/uniprot/A6GY20
GX-01_GM002595	93	3.9e-54	A5FP04	50S ribosomal protein L20	rplT	Flavobacterium johnsoniae (strain ATCC 17061 / DSM 2064 / UW101)	https://www.uniprot.org/uniprot/A5FP04
GX-01_GM002596	54.6	6.1e-83	A5FHX5	Ribosomal RNA large subunit methyltransferase F	rlmF	Flavobacterium johnsoniae (strain ATCC 17061 / DSM 2064 / UW101)	https://www.uniprot.org/uniprot/A5FHX5
GX-01_GM002598	41.6	2.1e-99	P37469	Replicative DNA helicase	dnaC	Bacillus subtilis (strain 168)	https://www.uniprot.org/uniprot/P37469
GX-01_GM002599	79.5	1.5e-148	A6GX95	Acetyl-coenzyme A carboxylase carboxyl transferase subunit alpha	accA	Flavobacterium psychrophilum (strain JIP02/86 / ATCC 49511)	https://www.uniprot.org/uniprot/A6GX95
GX-01_GM002602	54.4	1e-111	Q8RAM9	Queuine tRNA-ribosyltransferase	tgt	Caldanaerobacter subterraneus subsp. tengcongensis (strain DSM 15242 / JCM 11007 / NBRC 100824 / MB4)	https://www.uniprot.org/uniprot/Q8RAM9
GX-01_GM002603	46.4	2.6e-59	Q58094	Putative transketolase N-terminal section	MJ0681	Methanocaldococcus jannaschii (strain ATCC 43067 / DSM 2661 / JAL-1 / JCM 10045 / NBRC 100440)	https://www.uniprot.org/uniprot/Q58094
GX-01_GM002604	44.7	7.9e-65	Q58092	Putative transketolase C-terminal section	MJ0679	Methanocaldococcus jannaschii (strain ATCC 43067 / DSM 2661 / JAL-1 / JCM 10045 / NBRC 100440)	https://www.uniprot.org/uniprot/Q58092
GX-01_GM002605	42.5	1.1e-08	Q9KDI4	Sec translocon accessory complex subunit YajC	yajC	Bacillus halodurans (strain ATCC BAA-125 / DSM 18197 / FERM 7344 / JCM 9153 / C-125)	https://www.uniprot.org/uniprot/Q9KDI4
GX-01_GM002607	42.4	8.2e-19	Q3B298	Transcription antitermination protein NusB	nusB	Chlorobium luteolum (strain DSM 273 / 2530)	https://www.uniprot.org/uniprot/Q3B298
GX-01_GM002608	55	2.7e-109	Q60030	Leucine dehydrogenase	ldh	Thermoactinomyces intermedius	https://www.uniprot.org/uniprot/Q60030
GX-01_GM002613	53.9	1.7e-255	O50628	DNA gyrase subunit A	gyrA	Bacillus halodurans (strain ATCC BAA-125 / DSM 18197 / FERM 7344 / JCM 9153 / C-125)	https://www.uniprot.org/uniprot/O50628
GX-01_GM002614	50.4	4.1e-241	P37571	Negative regulator of genetic competence ClpC/MecB	clpC	Bacillus subtilis (strain 168)	https://www.uniprot.org/uniprot/P37571
GX-01_GM002615	67.2	1.2e-175	A8H4D4	Probable alpha-L-glutamate ligase	rimK	Shewanella pealeana (strain ATCC 700345 / ANG-SQ1)	https://www.uniprot.org/uniprot/A8H4D4
GX-01_GM002618	63.5	7.6e-198	A5FG48	UPF0061 protein Fjoh_2793	Fjoh_2793	Flavobacterium johnsoniae (strain ATCC 17061 / DSM 2064 / UW101)	https://www.uniprot.org/uniprot/A5FG48
GX-01_GM002625	40.8	2.3e-73	P39576	Branched-chain-amino-acid aminotransferase 2	ilvK	Bacillus subtilis (strain 168)	https://www.uniprot.org/uniprot/P39576
GX-01_GM002632	42.9	3.9e-91	O07576	Uncharacterized amino acid permease YhdG	yhdG	Bacillus subtilis (strain 168)	https://www.uniprot.org/uniprot/O07576
GX-01_GM002636	45.1	1.9e-32	P0AE54	Putative peroxiredoxin bcp	bcp	Escherichia coli O157:H7	https://www.uniprot.org/uniprot/P0AE54
GX-01_GM002637	40	5e-34	P39788	Endonuclease III	nth	Bacillus subtilis (strain 168)	https://www.uniprot.org/uniprot/P39788
GX-01_GM002640	55.3	4.7e-70	Q9X1E3	Probable glycerol uptake facilitator protein	glpF	Thermotoga maritima (strain ATCC 43589 / MSB8 / DSM 3109 / JCM 10099)	https://www.uniprot.org/uniprot/Q9X1E3
GX-01_GM002642	65	2.7e-192	Q7P1G2	Glycerol kinase	glpK	Chromobacterium violaceum (strain ATCC 12472 / DSM 30191 / JCM 1249 / NBRC 12614 / NCIMB 9131 / NCTC 9757)	https://www.uniprot.org/uniprot/Q7P1G2
GX-01_GM002644	68.2	0	Q89YY3	Chaperone protein ClpB	clpB	Bacteroides thetaiotaomicron (strain ATCC 29148 / DSM 2079 / NCTC 10582 / E50 / VPI-5482)	https://www.uniprot.org/uniprot/Q89YY3
GX-01_GM002648	74.3	3.6e-93	A6H098	Pyridoxine/pyridoxamine 5'-phosphate oxidase	pdxH	Flavobacterium psychrophilum (strain JIP02/86 / ATCC 49511)	https://www.uniprot.org/uniprot/A6H098
GX-01_GM002649	43.6	2.9e-69	A6LFA6	Ribonuclease Z	rnz	Parabacteroides distasonis (strain ATCC 8503 / DSM 20701 / CIP 104284 / JCM 5825 / NCTC 11152)	https://www.uniprot.org/uniprot/A6LFA6
GX-01_GM002652	42.9	4.7e-74	A6LEZ7	3-dehydroquinate synthase	aroB	Parabacteroides distasonis (strain ATCC 8503 / DSM 20701 / CIP 104284 / JCM 5825 / NCTC 11152)	https://www.uniprot.org/uniprot/A6LEZ7
GX-01_GM002658	91.2	6.6e-157	A6H0I8	Aspartate carbamoyltransferase	pyrB	Flavobacterium psychrophilum (strain JIP02/86 / ATCC 49511)	https://www.uniprot.org/uniprot/A6H0I8
GX-01_GM002659	43.9	3.2e-31	B7KKJ9	Bifunctional protein PyrR	pyrR	Cyanothece sp. (strain PCC 7424)	https://www.uniprot.org/uniprot/B7KKJ9
GX-01_GM002660	42.8	4.9e-129	P38016	30S ribosomal protein S1	rpsA	Chlamydia muridarum (strain MoPn / Nigg)	https://www.uniprot.org/uniprot/P38016
GX-01_GM002661	50.2	6e-121	P0AFF4	Nucleoside permease NupG	nupG	Escherichia coli (strain K12)	https://www.uniprot.org/uniprot/P0AFF4
GX-01_GM002662	70.4	2.4e-84	A5FG91	Cytidylate kinase	cmk	Flavobacterium johnsoniae (strain ATCC 17061 / DSM 2064 / UW101)	https://www.uniprot.org/uniprot/A5FG91
GX-01_GM002664	79	0	A5FG89	Lon protease	lon	Flavobacterium johnsoniae (strain ATCC 17061 / DSM 2064 / UW101)	https://www.uniprot.org/uniprot/A5FG89
GX-01_GM002669	57.4	2.3e-95	Q4ULQ8	Succinate--CoA ligase [ADP-forming] subunit alpha	sucD	Rickettsia felis (strain ATCC VR-1525 / URRWXCal2)	https://www.uniprot.org/uniprot/Q4ULQ8
GX-01_GM002670	41.1	5.6e-39	B1ZLC2	UDP-3-O-acylglucosamine N-acyltransferase	lpxD	Methylobacterium populi (strain ATCC BAA-705 / NCIMB 13946 / BJ001)	https://www.uniprot.org/uniprot/B1ZLC2
GX-01_GM002671	89.4	4.8e-94	A5FFT9	Elongation factor P	efp	Flavobacterium johnsoniae (strain ATCC 17061 / DSM 2064 / UW101)	https://www.uniprot.org/uniprot/A5FFT9
GX-01_GM002672	47.6	1.8e-62	A1BIY4	Acyl-[acyl-carrier-protein]--UDP-N-acetylglucosamine O-acyltransferase	lpxA	Chlorobium phaeobacteroides (strain DSM 266)	https://www.uniprot.org/uniprot/A1BIY4
GX-01_GM002673	51.5	1.2e-138	Q8A015	Bifunctional enzyme LpxC/FabZ	lpxC/fabZ	Bacteroides thetaiotaomicron (strain ATCC 29148 / DSM 2079 / NCTC 10582 / E50 / VPI-5482)	https://www.uniprot.org/uniprot/Q8A015
GX-01_GM002674	63.8	6e-127	A0M2A1	UDP-3-O-acylglucosamine N-acyltransferase	lpxD	Gramella forsetii (strain KT0803)	https://www.uniprot.org/uniprot/A0M2A1
GX-01_GM002678	41.8	3.9e-16	Q92JQ4	tRNA threonylcarbamoyladenosine biosynthesis protein TsaE	tsaE	Rickettsia conorii (strain ATCC VR-613 / Malish 7)	https://www.uniprot.org/uniprot/Q92JQ4
GX-01_GM002683	88.9	3.6e-144	A6GZM5	Bifunctional protein FolD	folD	Flavobacterium psychrophilum (strain JIP02/86 / ATCC 49511)	https://www.uniprot.org/uniprot/A6GZM5
GX-01_GM002684	53.7	2.9e-129	P37105	Signal recognition particle protein	ffh	Bacillus subtilis (strain 168)	https://www.uniprot.org/uniprot/P37105
GX-01_GM002685	61.8	2.6e-257	P27028	Prolyl endopeptidase	f1pep1	Elizabethkingia meningoseptica	https://www.uniprot.org/uniprot/P27028
GX-01_GM002689	40.3	6.7e-150	O34580	ATP-dependent DNA helicase PcrA	pcrA	Bacillus subtilis (strain 168)	https://www.uniprot.org/uniprot/O34580
GX-01_GM002690	66.5	7.4e-66	A5FH89	dITP/XTP pyrophosphatase	Fjoh_2403	Flavobacterium johnsoniae (strain ATCC 17061 / DSM 2064 / UW101)	https://www.uniprot.org/uniprot/A5FH89
GX-01_GM002696	56.8	1.3e-87	P19769	Putative transposase InsK for insertion sequence element IS150	insK	Escherichia coli (strain K12)	https://www.uniprot.org/uniprot/P19769
GX-01_GM002706	46.9	4.5e-09	P33355	Uncharacterized protein YehS	yehS	Escherichia coli (strain K12)	https://www.uniprot.org/uniprot/P33355
GX-01_GM002711	47.3	2.9e-139	Q9HCC0	Methylcrotonoyl-CoA carboxylase beta chain, mitochondrial	MCCC2	Homo sapiens	https://www.uniprot.org/uniprot/Q9HCC0
GX-01_GM002721	44.8	7.4e-61	P37556	Uncharacterized protein YabN	yabN	Bacillus subtilis (strain 168)	https://www.uniprot.org/uniprot/P37556
GX-01_GM002723	80.3	1.4e-85	A6H0E7	Peptide deformylase	def	Flavobacterium psychrophilum (strain JIP02/86 / ATCC 49511)	https://www.uniprot.org/uniprot/A6H0E7
GX-01_GM002724	76.6	6.7e-228	A6H0E6	Probable malate:quinone oxidoreductase	mqo	Flavobacterium psychrophilum (strain JIP02/86 / ATCC 49511)	https://www.uniprot.org/uniprot/A6H0E6
GX-01_GM002725	75.9	2e-52	A6H0E5	Putative pre-16S rRNA nuclease	FP1751	Flavobacterium psychrophilum (strain JIP02/86 / ATCC 49511)	https://www.uniprot.org/uniprot/A6H0E5
GX-01_GM002726	54	2e-69	A1K717	2,3,4,5-tetrahydropyridine-2,6-dicarboxylate N-succinyltransferase	dapD	Azoarcus sp. (strain BH72)	https://www.uniprot.org/uniprot/A1K717
GX-01_GM002734	45.6	1.3e-74	Q606L3	3-oxoacyl-[acyl-carrier-protein] synthase 3	fabH	Methylococcus capsulatus (strain ATCC 33009 / NCIMB 11132 / Bath)	https://www.uniprot.org/uniprot/Q606L3
GX-01_GM002739	45.3	4.5e-17	Q05146	Outer membrane protein A	ompA	Bordetella avium	https://www.uniprot.org/uniprot/Q05146
GX-01_GM002741	57.2	7.8e-189	Q8A9B8	Chaperone protein HtpG	htpG	Bacteroides thetaiotaomicron (strain ATCC 29148 / DSM 2079 / NCTC 10582 / E50 / VPI-5482)	https://www.uniprot.org/uniprot/Q8A9B8
GX-01_GM002742	50.8	8.6e-08	Q9S1B7	Cold shock-like protein CspA	cspA	Shewanella violacea (strain JCM 10179 / CIP 106290 / LMG 19151 / DSS12)	https://www.uniprot.org/uniprot/Q9S1B7
GX-01_GM002751	43.1	1.2e-34	Q32L00	Alpha-ketoglutarate-dependent dioxygenase alkB homolog 3	ALKBH3	Bos taurus	https://www.uniprot.org/uniprot/Q32L00
GX-01_GM002756	46.1	7.9e-77	P27254	GTPase ArgK	argK	Escherichia coli (strain K12)	https://www.uniprot.org/uniprot/P27254
GX-01_GM002758	40.7	3.8e-62	P96554	Uncharacterized membrane protein STKORF319	3 SV	Myxococcus xanthus	https://www.uniprot.org/uniprot/P96554
GX-01_GM002761	42.4	3.4e-105	P76481	Uncharacterized protein YfbK	yfbK	Escherichia coli (strain K12)	https://www.uniprot.org/uniprot/P76481
GX-01_GM002764	45.1	4.2e-125	P18956	Glutathione hydrolase proenzyme	ggt	Escherichia coli (strain K12)	https://www.uniprot.org/uniprot/P18956
GX-01_GM002767	44.9	8.1e-88	P14375	Transcriptional regulatory protein ZraR	zraR	Escherichia coli (strain K12)	https://www.uniprot.org/uniprot/P14375
GX-01_GM002769	42.1	3.3e-60	C0SPB4	Uncharacterized ABC transporter ATP-binding protein YhaQ	yhaQ	Bacillus subtilis (strain 168)	https://www.uniprot.org/uniprot/C0SPB4
GX-01_GM002770	51.9	1e-111	Q8A8C3	Chaperone protein DnaJ	dnaJ	Bacteroides thetaiotaomicron (strain ATCC 29148 / DSM 2079 / NCTC 10582 / E50 / VPI-5482)	https://www.uniprot.org/uniprot/Q8A8C3
GX-01_GM002771	43.3	1.3e-32	Q8A8C4	Protein GrpE	grpE	Bacteroides thetaiotaomicron (strain ATCC 29148 / DSM 2079 / NCTC 10582 / E50 / VPI-5482)	https://www.uniprot.org/uniprot/Q8A8C4
GX-01_GM002777	43.4	6.4e-14	C0H3Y4	Putative DNA-binding protein YizB	yizB	Bacillus subtilis (strain 168)	https://www.uniprot.org/uniprot/C0H3Y4
GX-01_GM002785	53.1	2.1e-86	Q1RJD8	Thioredoxin reductase	trxB	Rickettsia bellii (strain RML369-C)	https://www.uniprot.org/uniprot/Q1RJD8
GX-01_GM002787	48.6	1.1e-79	P51835	Signal recognition particle receptor FtsY	ftsY	Bacillus subtilis (strain 168)	https://www.uniprot.org/uniprot/P51835
GX-01_GM002789	100	4.3e-28	A5F9Z0	50S ribosomal protein L33	rpmG	Flavobacterium johnsoniae (strain ATCC 17061 / DSM 2064 / UW101)	https://www.uniprot.org/uniprot/A5F9Z0
GX-01_GM002790	93.6	3.6e-35	A6GZI6	50S ribosomal protein L28	rpmB	Flavobacterium psychrophilum (strain JIP02/86 / ATCC 49511)	https://www.uniprot.org/uniprot/A6GZI6
GX-01_GM002791	67.4	4.4e-164	A6GZI7	CinA-like protein	FP1434	Flavobacterium psychrophilum (strain JIP02/86 / ATCC 49511)	https://www.uniprot.org/uniprot/A6GZI7
GX-01_GM002793	41.8	1.5e-37	Q86I22	Acylpyruvase FAHD1, mitochondrial	fahd1	Dictyostelium discoideum	https://www.uniprot.org/uniprot/Q86I22
GX-01_GM002798	42.9	8e-141	O06476	Uncharacterized ABC transporter ATP-binding protein YfmR	yfmR	Bacillus subtilis (strain 168)	https://www.uniprot.org/uniprot/O06476
GX-01_GM002803	57.5	3.1e-71	O31711	Uncharacterized ABC transporter ATP-binding protein YknY	yknY	Bacillus subtilis (strain 168)	https://www.uniprot.org/uniprot/O31711
GX-01_GM002805	46	7.6e-31	O34899	Cob(I)yrinic acid a,c-diamide adenosyltransferase	yvqK	Bacillus subtilis (strain 168)	https://www.uniprot.org/uniprot/O34899
GX-01_GM002807	82.5	0	A6GX63	Protein translocase subunit SecA	secA	Flavobacterium psychrophilum (strain JIP02/86 / ATCC 49511)	https://www.uniprot.org/uniprot/A6GX63
GX-01_GM002813	42.6	3e-120	Q9KJX5	Alkaline phosphatase PafA	pafA	Elizabethkingia meningoseptica	https://www.uniprot.org/uniprot/Q9KJX5
GX-01_GM002815	42	1.9e-78	P77806	Methionine aminotransferase	ybdL	Escherichia coli (strain K12)	https://www.uniprot.org/uniprot/P77806
GX-01_GM002816	61.4	1.1e-77	P37522	Sporulation initiation inhibitor protein Soj	soj	Bacillus subtilis (strain 168)	https://www.uniprot.org/uniprot/P37522
GX-01_GM002817	41.9	1.9e-52	P0A151	Probable chromosome-partitioning protein ParB	parB	Pseudomonas putida (strain ATCC 47054 / DSM 6125 / NCIMB 11950 / KT2440)	https://www.uniprot.org/uniprot/P0A151
GX-01_GM002819	59	4.9e-72	A0LZI4	4-hydroxy-tetrahydrodipicolinate reductase	dapB	Gramella forsetii (strain KT0803)	https://www.uniprot.org/uniprot/A0LZI4
GX-01_GM002825	78.8	9.8e-285	A6GYR1	DNA mismatch repair protein MutL	mutL	Flavobacterium psychrophilum (strain JIP02/86 / ATCC 49511)	https://www.uniprot.org/uniprot/A6GYR1
GX-01_GM002826	78.3	1.3e-68	A6H143	6,7-dimethyl-8-ribityllumazine synthase	ribH	Flavobacterium psychrophilum (strain JIP02/86 / ATCC 49511)	https://www.uniprot.org/uniprot/A6H143
GX-01_GM002828	78.8	4.2e-163	A6H141	DNA replication and repair protein RecF	recF	Flavobacterium psychrophilum (strain JIP02/86 / ATCC 49511)	https://www.uniprot.org/uniprot/A6H141
GX-01_GM002829	40	8.4e-16	P80579	Thioredoxin	trxA	Alicyclobacillus acidocaldarius	https://www.uniprot.org/uniprot/P80579
GX-01_GM002832	74.5	6.7e-147	A5FNG4	UDP-N-acetylenolpyruvoylglucosamine reductase	murB	Flavobacterium johnsoniae (strain ATCC 17061 / DSM 2064 / UW101)	https://www.uniprot.org/uniprot/A5FNG4
GX-01_GM002838	61	5.4e-92	P28638	DNA adenine methyltransferase YhdJ	yhdJ	Escherichia coli (strain K12)	https://www.uniprot.org/uniprot/P28638
GX-01_GM002845	58.2	5.8e-52	O66105	Probable peptidyl-prolyl cis-trans isomerase	ppiB	Treponema pallidum (strain Nichols)	https://www.uniprot.org/uniprot/O66105
GX-01_GM002849	82.7	1.1e-105	A5FHV7	tRNA (guanine-N(1)-)-methyltransferase	trmD	Flavobacterium johnsoniae (strain ATCC 17061 / DSM 2064 / UW101)	https://www.uniprot.org/uniprot/A5FHV7
GX-01_GM002850	43.4	1.2e-48	A5JYX5	Protein dhs-3	dhs-3	Caenorhabditis elegans	https://www.uniprot.org/uniprot/A5JYX5
GX-01_GM002853	81.9	1.3e-49	A5FHV5	50S ribosomal protein L19	rplS	Flavobacterium johnsoniae (strain ATCC 17061 / DSM 2064 / UW101)	https://www.uniprot.org/uniprot/A5FHV5
GX-01_GM002855	64.6	1.1e-274	P16100	Isocitrate dehydrogenase [NADP]	icd	Azotobacter vinelandii	https://www.uniprot.org/uniprot/P16100
GX-01_GM002860	71.8	9.3e-141	P00472	Modification methylase EcoRI	ecoRIM	Escherichia coli	https://www.uniprot.org/uniprot/P00472
GX-01_GM002861	74.5	3.3e-115	P00642	Type-2 restriction enzyme EcoRI	ecoRIR	Escherichia coli	https://www.uniprot.org/uniprot/P00642
GX-01_GM002863	64.6	1.1e-252	Q5LC24	UvrABC system protein B	uvrB	Bacteroides fragilis (strain ATCC 25285 / DSM 2151 / JCM 11019 / NCTC 9343)	https://www.uniprot.org/uniprot/Q5LC24
GX-01_GM002865	75.7	1e-270	A5FND6	Arginine--tRNA ligase	argS	Flavobacterium johnsoniae (strain ATCC 17061 / DSM 2064 / UW101)	https://www.uniprot.org/uniprot/A5FND6
GX-01_GM002871	53.1	9.8e-37	Q9LU86	Peroxiredoxin Q, chloroplastic	PRXQ	Arabidopsis thaliana	https://www.uniprot.org/uniprot/Q9LU86
GX-01_GM002872	49.6	4.4e-33	Q03393	6-pyruvoyl tetrahydrobiopterin synthase	PTS	Homo sapiens	https://www.uniprot.org/uniprot/Q03393
GX-01_GM002873	45.2	2.9e-40	Q6D3F5	Isopentenyl-diphosphate Delta-isomerase	idi	Pectobacterium atrosepticum (strain SCRI 1043 / ATCC BAA-672)	https://www.uniprot.org/uniprot/Q6D3F5
GX-01_GM002874	41.3	6.4e-96	Q05627	Uncharacterized protein Cbei_0202	Cbei_0202	Clostridium beijerinckii (strain ATCC 51743 / NCIMB 8052)	https://www.uniprot.org/uniprot/Q05627
GX-01_GM002881	49.2	5.7e-44	P77368	UPF0098 protein YbcL	ybcL	Escherichia coli (strain K12)	https://www.uniprot.org/uniprot/P77368
GX-01_GM002888	46.2	7.3e-54	Q086T5	Adenosylcobinamide-GDP ribazoletransferase	cobS	Shewanella frigidimarina (strain NCIMB 400)	https://www.uniprot.org/uniprot/Q086T5
GX-01_GM002889	51.6	3.6e-92	Q8EYK9	Nicotinate-nucleotide--dimethylbenzimidazole phosphoribosyltransferase	cobT	Leptospira interrogans serogroup Icterohaemorrhagiae serovar Lai (strain 56601)	https://www.uniprot.org/uniprot/Q8EYK9
GX-01_GM002899	43.7	1e-27	P75966	Ribosomal large subunit pseudouridine synthase E	rluE	Escherichia coli (strain K12)	https://www.uniprot.org/uniprot/P75966
GX-01_GM002905	42.1	3.5e-98	Q9KVQ7	DNA recombination protein RmuC homolog	rmuC	Vibrio cholerae serotype O1 (strain ATCC 39315 / El Tor Inaba N16961)	https://www.uniprot.org/uniprot/Q9KVQ7
GX-01_GM002908	42	9.2e-26	P0A0Q8	Protein VdlD	vdlD	Helicobacter pylori (strain J99 / ATCC 700824)	https://www.uniprot.org/uniprot/P0A0Q8
GX-01_GM002913	65.7	6.4e-138	A6H0G8	Na(+)/H(+) antiporter NhaA	nhaA	Flavobacterium psychrophilum (strain JIP02/86 / ATCC 49511)	https://www.uniprot.org/uniprot/A6H0G8
GX-01_GM002917	53.5	1.9e-287	O28994	Carbamoyl-phosphate synthase large chain	carB	Archaeoglobus fulgidus (strain ATCC 49558 / VC-16 / DSM 4304 / JCM 9628 / NBRC 100126)	https://www.uniprot.org/uniprot/O28994
GX-01_GM002918	90	2.1e-18	A0M0A2	50S ribosomal protein L34	rpmH	Gramella forsetii (strain KT0803)	https://www.uniprot.org/uniprot/A0M0A2
GX-01_GM002927	40.5	8.3e-89	P54462	Threonylcarbamoyladenosine tRNA methylthiotransferase MtaB	mtaB	Bacillus subtilis (strain 168)	https://www.uniprot.org/uniprot/P54462
GX-01_GM002929	62.1	1.6e-159	P07346	Aspartate ammonia-lyase	aspA	Pseudomonas fluorescens	https://www.uniprot.org/uniprot/P07346
GX-01_GM002931	73.5	4.8e-30	A6LDB6	50S ribosomal protein L31 type B	rpmE2	Parabacteroides distasonis (strain ATCC 8503 / DSM 20701 / CIP 104284 / JCM 5825 / NCTC 11152)	https://www.uniprot.org/uniprot/A6LDB6
GX-01_GM002934	42.5	1.4e-120	P18159	Phosphoglucomutase	pgcA	Bacillus subtilis (strain 168)	https://www.uniprot.org/uniprot/P18159
GX-01_GM002941	86.7	6.5e-258	A6GYR0	Ribonuclease Y	rny	Flavobacterium psychrophilum (strain JIP02/86 / ATCC 49511)	https://www.uniprot.org/uniprot/A6GYR0
GX-01_GM002945	40.5	5e-35	Q64UM6	UPF0301 protein BF2056	BF2056	Bacteroides fragilis (strain YCH46)	https://www.uniprot.org/uniprot/Q64UM6
GX-01_GM002946	55.6	1.4e-19	Q9KQS9	DNA-binding protein HU-beta	hupB	Vibrio cholerae serotype O1 (strain ATCC 39315 / El Tor Inaba N16961)	https://www.uniprot.org/uniprot/Q9KQS9
GX-01_GM002947	72.3	2.9e-128	A6H148	Methionyl-tRNA formyltransferase	fmt	Flavobacterium psychrophilum (strain JIP02/86 / ATCC 49511)	https://www.uniprot.org/uniprot/A6H148
GX-01_GM002948	42.3	6.8e-76	P15043	ATP-dependent DNA helicase RecQ	recQ	Escherichia coli (strain K12)	https://www.uniprot.org/uniprot/P15043
GX-01_GM002952	69	7.8e-172	Q8A681	UDP-N-acetylglucosamine 1-carboxyvinyltransferase	murA	Bacteroides thetaiotaomicron (strain ATCC 29148 / DSM 2079 / NCTC 10582 / E50 / VPI-5482)	https://www.uniprot.org/uniprot/Q8A681
GX-01_GM002954	54.4	4.7e-36	Q46H25	3-dehydroquinate dehydratase	aroQ	Prochlorococcus marinus (strain NATL2A)	https://www.uniprot.org/uniprot/Q46H25
GX-01_GM002957	41	1.8e-63	Q5HP53	Tyrosine recombinase XerD	xerD	Staphylococcus epidermidis (strain ATCC 35984 / RP62A)	https://www.uniprot.org/uniprot/Q5HP53
GX-01_GM002958	79.6	8.1e-215	A5F9R5	Histidine--tRNA ligase	hisS	Flavobacterium johnsoniae (strain ATCC 17061 / DSM 2064 / UW101)	https://www.uniprot.org/uniprot/A5F9R5
GX-01_GM002960	63.2	4.9e-98	A6H162	Release factor glutamine methyltransferase	prmC	Flavobacterium psychrophilum (strain JIP02/86 / ATCC 49511)	https://www.uniprot.org/uniprot/A6H162
GX-01_GM002961	43.9	1.4e-30	Q08021	Uncharacterized N-acetyltransferase YjgM	yjgM	Salmonella typhimurium (strain LT2 / SGSC1412 / ATCC 700720)	https://www.uniprot.org/uniprot/Q08021
GX-01_GM002962	52.9	3.8e-33	Q8K9A4	Diaminohydroxyphosphoribosylamino-pyrimidine deaminase	ribD1	Buchnera aphidicola subsp. Schizaphis graminum (strain Sg)	https://www.uniprot.org/uniprot/Q8K9A4
GX-01_GM002964	43.4	2.4e-13	P32438	IMPACT family member in pol 5'region (Fragment)	3 SV	Thermus thermophilus	https://www.uniprot.org/uniprot/P32438
GX-01_GM002965	41.2	1.9e-20	Q45061	Putative acyl-CoA thioesterase YneP	yneP	Bacillus subtilis (strain 168)	https://www.uniprot.org/uniprot/Q45061
